# Supplementary material for: Barriers and facilitators to physical activity among children, adolescents, and young adults with cystic fibrosis: a systematic review and thematic synthesis of qualitative research
Source: PubMed Central journal article supplement — BMJ Open. 2020 Feb 20;10(2):e035261. doi: 10.1136/bmjopen-2019-035261 (PMC7045130; doi:10.1136/bmjopen-2019-035261), 2020-02-20
Supplement: bmjopen-2019-035261.draft_revisions.pdf [file bmjopen-2019-035261.draft_revisions.pdf]

# BMJ Open

BMJ Open is committed to open peer review. As part of this commitment we make the peer review history of every article we publish publicly available.

When an article is published we post the peer reviewers' comments and the authors' responses online. We also post the versions of the paper that were used during peer review. These are the versions that the peer review comments apply to.

The versions of the paper that follow are the versions that were submitted during the peer review process. They are not the versions of record or the final published versions. They should not be cited or distributed as the published version of this manuscript.

BMJ Open is an open access journal and the full, final, typeset and author-corrected version of record of the manuscript is available on our site with no access controls, subscription charges or pay-per-view fees (<http://bmjopen.bmj.com>).

If you have any questions on BMJ Open's open peer review process please email [info.bmjopen@bmj.com](mailto:info.bmjopen@bmj.com)

# BMJ Open

## Barriers and facilitators to physical activity among young people with cystic fibrosis: A systematic review and thematic synthesis of qualitative of research

|                               |                                                                                                                                                                                                                                                                                                                                                                                                   |
|-------------------------------|---------------------------------------------------------------------------------------------------------------------------------------------------------------------------------------------------------------------------------------------------------------------------------------------------------------------------------------------------------------------------------------------------|
| Journal:                      | <i>BMJ Open</i>                                                                                                                                                                                                                                                                                                                                                                                   |
| Manuscript ID                 | bmjopen-2019-035261                                                                                                                                                                                                                                                                                                                                                                               |
| Article Type:                 | Original research                                                                                                                                                                                                                                                                                                                                                                                 |
| Date Submitted by the Author: | 24-Oct-2019                                                                                                                                                                                                                                                                                                                                                                                       |
| Complete List of Authors:     | Denford, Sarah; University of Exeter, Children's Health & Exercise Research Centre, Sport and Health Sciences<br>van Beurden, Samantha; University of Exeter, Children's Health & Exercise Research Centre, Sport and Health Sciences<br>O'Halloran, Paul; La Trobe University,<br>Williams, Craig; University of Exeter, Children's Health & Exercise Research Centre, Sport and Health Sciences |
| Keywords:                     | QUALITATIVE RESEARCH, RESPIRATORY MEDICINE (see Thoracic Medicine), SPORTS MEDICINE, Cystic fibrosis < THORACIC MEDICINE, Paediatric thoracic medicine < PAEDIATRICS                                                                                                                                                                                                                              |
|                               |                                                                                                                                                                                                                                                                                                                                                                                                   |

SCHOLARONE™  
Manuscripts

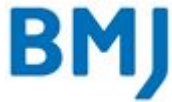

I, the Submitting Author has the right to grant and does grant on behalf of all authors of the Work (as defined in the below author licence), an exclusive licence and/or a non-exclusive licence for contributions from authors who are: i) UK Crown employees; ii) where BMJ has agreed a CC-BY licence shall apply, and/or iii) in accordance with the terms applicable for US Federal Government officers or employees acting as part of their official duties; on a worldwide, perpetual, irrevocable, royalty-free basis to BMJ Publishing Group Ltd ("BMJ") its licensees and where the relevant Journal is co-owned by BMJ to the co-owners of the Journal, to publish the Work in this journal and any other BMJ products and to exploit all rights, as set out in our [licence](#).

The Submitting Author accepts and understands that any supply made under these terms is made by BMJ to the Submitting Author unless you are acting as an employee on behalf of your employer or a postgraduate student of an affiliated institution which is paying any applicable article publishing charge ("APC") for Open Access articles. Where the Submitting Author wishes to make the Work available on an Open Access basis (and intends to pay the relevant APC), the terms of reuse of such Open Access shall be governed by a Creative Commons licence – details of these licences and which [Creative Commons](#) licence will apply to this Work are set out in our licence referred to above.

Other than as permitted in any relevant BMJ Author's Self Archiving Policies, I confirm this Work has not been accepted for publication elsewhere, is not being considered for publication elsewhere and does not duplicate material already published. I confirm all authors consent to publication of this Work and authorise the granting of this licence.

1  
2  
3 Barriers and facilitators to physical activity among young people with  
4  
5  
6 cystic fibrosis: A systematic review and thematic synthesis of  
7  
8  
9  
10 qualitative of research  
11  
12  
13  
14  
15

16 Denford, S., van Beurden, SB., O'Halloran, P., Williams, CA.  
17  
18  
19  
20  
21

22 **Corresponding author:**  
23  
24

25 Sarah Denford,  
26  
27

28 Children's Health and Exercise Research Centre,  
29  
30

31 Sport and Health Sciences, University of Exeter,  
32  
33

34 St. Luke's Campus,  
35  
36

37 Heavitree Road,  
38  
39

40 Exeter, EX1 2LU, UK.  
41  
42

43 Email: [S.Denford@exeter.ac.uk](mailto:S.Denford@exeter.ac.uk)  
44  
45  
46  
47

48 Samantha B van Beurden,  
49  
50

51 Children's Health and Exercise Research Centre,  
52  
53

54 Sport and Health Sciences,  
55  
56

57 University of Exeter,  
58  
59  
60

1  
2  
3 St. Luke's Campus,  
4

5  
6 Heavitree Road,  
7

8  
9 Exeter, EX1 2LU, UK.  
10

11  
12 Email: [S.Van-Beurden@exeter.ac.uk](mailto:S.Van-Beurden@exeter.ac.uk)  
13  
14

15  
16  
17 Paul O'Halloran,  
18

19  
20 School of Psychology and Public Health,  
21

22  
23 La Trobe University,  
24

25  
26 Bundoora Victoria 3086  
27

28  
29 Email: [P.OHalloran@latrobe.edu.au](mailto:P.OHalloran@latrobe.edu.au)  
30  
31

32  
33  
34  
35 Craig A Williams,  
36

37  
38 Children's Health and Exercise Research Centre,  
39

40  
41 Sport and Health Sciences,  
42

43  
44 University of Exeter, St. Luke's Campus,  
45

46  
47 Heavitree Road,  
48

49  
50 Exeter, EX1 2LU, UK.  
51

52  
53 Email: [C.A.Williams@Exeter.ac.uk](mailto:C.A.Williams@Exeter.ac.uk)  
54  
55  
56  
57  
58  
59  
60

1  
2  
3  
4  
5  
6 **Word count: 5886**  
7  
8

9 **Key words:** Respiratory, Exercise, Self-determination theory, Intrinsic motivation, Family.  
10  
11  
12  
13  
14  
15  
16  
17  
18  
19  
20  
21  
22  
23  
24  
25  
26  
27  
28  
29  
30  
31  
32  
33  
34  
35  
36  
37  
38  
39  
40  
41  
42  
43  
44  
45  
46  
47  
48  
49  
50  
51  
52  
53  
54  
55  
56  
57  
58  
59  
60

For peer review only

## Abstract

Objectives: Physical activity is widely recommended in the treatment and management of cystic fibrosis (CF). Despite the numerous physical and psychological benefits, many young people with CF are not achieving the recommended levels of physical activity. The aim of this systematic review was to identify and synthesise available qualitative investigations exploring the motives for, barriers to and facilitators of physical activity among young people with CF.

Methods: Electronic bibliographies were searched systematically to identify qualitative research that explored engagement in physical activity among young people with CF. Titles and abstracts were screened by two independent reviewers, and potentially relevant articles were retrieved in full. Articles were eligible for inclusion if they employed any qualitative method and recruited participants under the age of 24 years with CF. Risk of bias of included studies were assessed via the Critical Appraisal Skills Program.

Results: Results were synthesised using a thematic approach. Eight studies met our inclusion criteria and were included in the review. Overall, studies were of moderate to high quality. Thematic synthesis identified nine main themes that encompass motives for, barriers to and facilitators of physical activity among young people with CF. These were 1) perceptions of physical activity, 2) value attributed to physical activity, 3) social influences, 4) competing priorities, 5) fluctuating health, 6) normality, 7) control beliefs, 8) coping strategies, and 9) availability of facilities. Previous reviews have been unable to identify intervention characteristics that influence physical activity behaviour.

Conclusions: This review provides detailed information on the physical (biological – clinical), psychological, social, and environmental influences on physical activity behaviour, thus

1  
2  
3 providing numerous targets for future interventions. This in turn could facilitate promotion  
4  
5 of physical activity among young people with CF.  
6  
7

## 8 **Article summary**

9

### 10 **Strengths and limitations of this study**

11

- 12 • This is the first synthesis of qualitative work that has explored barriers and  
13  
14  
15  
16  
17  
18  
19  
20  
21  
22  
23  
24  
25  
26  
27  
28  
29  
30  
31  
32  
33  
34  
35  
36  
37  
38  
39  
40  
41  
42  
43  
44  
45  
46  
47  
48  
49  
50  
51  
52  
53  
54  
55  
56  
57  
58  
59  
60
- We present in depth qualitative data on the physical (biological – clinical),  
psychological, social, and environmental influences on physical activity behaviour.
- We were not able to include data from 16 potentially relevant abstracts as no full  
text were available.
- Three of the studies included in the review were authored by one research team,  
this may reflect a smaller distribution of participants, potentially reducing the  
transferability of findings.



1  
2  
3 **Declarations of conflicting interests**  
4

5  
6 The authors declare that there is no conflict of interest.  
7

8  
9 **Ethics approval and consent to participate**  
10

11  
12 Not applicable  
13

14  
15 **Consent for publication**  
16

17  
18 Not applicable  
19

20  
21 **Availability of data and material**  
22

23  
24 Not applicable  
25

26  
27 **Funding**  
28

29 The following work was supported by the Cystic Fibrosis Trust Strategic Research Centre:  
30  
31 grant number 008. The funders had no involvement in the research.  
32  
33

34  
35 **Author contributions**  
36

37 This study was designed by SD with considerable input from SvB, CW and PO. Studies were  
38 identified by SD with input from colleagues with expertise in systematic reviewing. Data  
39 were extracted and analysed by SD and SvB with input from PO and CW. The manuscript  
40 was prepared by SD with considerable input from SvB, CW and PO. All authors approved the  
41 final manuscript prior to publication.  
42  
43  
44  
45  
46  
47  
48  
49  
50  
51  
52  
53  
54  
55  
56  
57  
58  
59  
60

## Background

Cystic fibrosis (CF) is a progressive, genetic condition affecting more than 10,400 people in the United Kingdom, and more than 70,000 worldwide [1]. Mutations in the cystic fibrosis transmembrane (CFTR) affect the regulation of salt and water movement across cell membranes, resulting in abnormally thick mucus in the lungs and digestive system. This leads to bronchiectasis, inflammation, recurrent infections and eventually respiratory failure. There is no cure for CF, but advances in treatment mean that people with CF have a greater life expectancy than previous generations [2]. However, treatment is demanding; comprising a complex regime of pharmacological treatments, physiotherapy and airway clearance, high calorie diets and physical activity [3].

Physical activity, inclusive of sport, exercise, and recreational activities are widely recommended in the management of CF [4] due to the beneficial impact on aerobic capacity and lung function [5, 6], as well as improvements in cardiovascular endurance [7], muscular strength [8], and mucus clearance [9]. Physical activity also has a positive impact on health-related quality of life [6], fatigue [10], and psychological wellbeing [11]. The role of physical activity in the management of CF is viewed favourably by both healthcare professionals [12, 13] and people with CF [14, 15]. Despite this, like their healthy peers, many children with CF are failing to achieve the national (UK) recommended 60 minutes of daily moderate to vigorous activity [16, 17], with levels reducing further throughout adolescence [18]. Not only does this have implications for physical health [19], it also has a detrimental impact on psychological health, as well as reducing opportunities for social interaction.

The impact of physical activity on the physical and psychological health of individuals with cystic fibrosis has been well established. However, in contrast to the literature regarding the

1  
2  
3 benefits of physical activity, there is a paucity of literature regarding how best to support  
4  
5 young people with CF to be more physically active. One quantitative review, of interventions  
6  
7 for promoting physical activity among individuals with CF [20], found little evidence to  
8  
9 support the effectiveness of any approach to promote physical activity. However, in order to  
10  
11 successfully change behaviour, it is necessary to identify and target determinants of the  
12  
13 behaviour in question [21]. However, the quantitative review did not consider the  
14  
15 modifiable determinants of physical activity and is therefore not able to explain what these  
16  
17 approaches were targeting (i.e., mechanisms of action) and why they may have failed to  
18  
19 promote physical activity.  
20  
21  
22  
23  
24

25 Identification of potentially modifiable psychological, social, environmental and behavioural  
26  
27 determinants of physical activity for young people with CF would be able to inform the  
28  
29 selection of approaches to effectively support changes in physical activity for this population  
30  
31 [22]. As qualitative methods provide in-depth, rich and detailed information about a topic as  
32  
33 experienced by target populations they are well placed to explore this topic. Whilst research  
34  
35 relating to motives, barriers and facilitators of physical activity among young people with CF  
36  
37 has been conducted [23-25], as yet, no review has comprehensively and systematically  
38  
39 synthesised this literature.  
40  
41  
42  
43  
44

## 45 **Aims**

46  
47  
48 This systematic review aimed to identify and synthesise the qualitative literature on the  
49  
50 motives for, barriers to, and facilitators of physical activity among young people with CF.  
51  
52 Specifically, we were interested in understanding: 1) What motivates young people with CF  
53  
54 to be active; 2) What are the barriers to being physically active among young people with  
55  
56 CF; 3) What facilitates physical active among young people with CF.  
57  
58  
59  
60

## Methods

The review was conducted and reported in accordance with the Preferred Reporting Items for Systematic Reviews and Meta-analyses (PRISMA) statement [26].

### Search strategy

Backward searches: Relevant sources were searched using key word such as: Cystic Fibrosis; Physical activity; Exercise; Sport; Recreation (See full Search Strategy in Appendix 1). Search terms were adapted for each database. Reference lists of existing reviews were also searched.

Forward searching: To identify any unpublished or ongoing work, key authors and experts in the field were contacted.

### Study selection

All titles and abstracts of identified records were reviewed by the lead author and ten per cent of these records were reviewed independently by a second reviewer. Conflicts at this stage were resolved via discussion and potentially relevant articles were retrieved in full and all were assessed independently by both reviewers against the inclusion criteria and quality assessment (as below).

### Inclusion criteria

#### *Types of studies to be included*

Any study using qualitative methods to identify motivators, barriers or facilitators to physical activity among young people with CF. We did not limit the search by date or location, but inclusion was limited to studies written in English.

### ***Participants / population***

Our population of interest were children and young people with CF under the age of 24 years. Studies including adults were also eligible for inclusion if the majority of participants fell between the relevant age bracket.

Studies including participants with multiple conditions (e.g., those studying people with chronic disease) were included as long as data provided by individuals with CF were clearly indicated.

### ***Intervention / exposure***

Any study describing motives for or barriers or facilitators to physical activity among young people with CF.

### **Exclusion criteria**

We excluded studies that: 1) did not include individuals with CF; 2) promote physical activity or exercise without consideration of barriers or facilitators; 3) are not reported in enough detail to identify barriers or facilitators to PA; 4) do not primarily target young people (under the age of 24); 5) are not published in English; 6) do not use qualitative methods.

### **Primary outcome**

1. Motives for physical activity participation among young people with CF.
2. Barriers to physical activity participation among young people with CF.
3. Facilitators of physical activity participation among young people with CF.

### **Data extraction**

Data were extracted by the first and second author using a data extraction template developed for this purpose.

1  
2  
3 Data were extracted on:  
4  
5

- 6 1. Author and year and location of publication
- 7
- 8 2. Study design
- 9
- 10 3. Sample size and characteristics
- 11
- 12 4. Data collection methods
- 13
- 14 5. Method of analysis
- 15
- 16 6. Barriers and facilitators identified or targeted
- 17
- 18 7. Overall conclusions
- 19
- 20
- 21
- 22

### 23 **Risk of bias**

24  
25  
26 Risk of bias were assessed independently by the first and second author using the Critical  
27 Appraisal Skills Program (CASP) tool for qualitative and observational studies [27].  
28

29 Disagreements were resolved via discussion. The CASP is a 10-item checklist comprising  
30 questions relating to the research design, data collection and analysis, reflexivity, ethics,  
31 implications of the research. We adopted a three-point rating system as used by a number  
32 of authors [28, 29], in which a rating point from 1-3 is given to each article for each of the  
33 CASP's questions. Studies receive a score of 1 for issues that are not mentioned or poorly  
34 justified; a score of 2 for little elaboration of an issue; and a score of 3 for issues that are  
35 well justified. This results in a quality score of between 8 and 24. Those scoring less than 15  
36 were categorised as weak. Those scoring between 16 and 23 were considered moderate,  
37 and those scoring 24 points were considered strong. In this review, the CASP was used to  
38 describe the quality of the studies for contextual purposes. No exclusions were made on the  
39 basis on CASP scores.  
40  
41  
42  
43  
44  
45  
46  
47  
48  
49  
50  
51  
52  
53  
54  
55  
56  
57  
58  
59  
60

## Strategy for data synthesis

Data from qualitative studies were synthesised using a thematic method [30] in which common themes from each study are highlighted and discussed. First, the results and discussion sections of the manuscripts were read by two reviewers, and relevant data were extracted and entered into Nvivo for analysis. Thematic analysis followed three stages as recommended by Thomas and Harden [31]. First, initial codes were created to describe or summarise relevant text. In the second stage, codes were organised into descriptive themes, and finally into analytical themes (stage 3).

## Patient and public involvement

A patient and public involvement group was established to inform the development and direction of our research. The group met regularly (via skype) and consisted of young people with cystic fibrosis, physiotherapists, technicians, and paediatricians. In the first instance, the group were asked to suggest research topics and questions they would like to be answered. Later, the group met to support the development of the protocol. Finally, the group were very much involved in disseminating the results of the review through the development and production of short animations.

## Results

### Study selection

The search results (Fig. 1) identified 10,673 records, of which 2631 were duplicates. After application of the exclusion criteria, eight studies were included in the thematic analysis.

## Overview of studies

The included studies were published between 2008 and 2018. One study was conducted in Australia [32], three in Canada [33-35], two in the United States of America [36, 37], and two in the United Kingdom [38, 39]. All studies reported the use of semi-structured interviews. One study used a multifaceted approach to data collection; also utilizing focus groups, mapping, photo-elicitation and traffic light posters [32]. One study reported the use of telephone interviews [37]. Methods of analysis included interpretive phenomenology [32, 38, 39], thematic analysis [34, 36, 37], grounded theory [35] and case study analysis [33].

The rationale for the conduct of the work was to increase understanding of physical activity among children with CF [32, 38], promote children's participation in research [32] and to inform the development of interventions to promote physical activity [34-37].

Participants were between the ages of 12 and 24 years; although one study included participants that were over the age of 24 years [38]. All had a confirmed diagnosis of CF, although two studies included participants with other chronic conditions; including coronary heart disease [34] asthma [32] and type one diabetes [32]. Three studies also included parents of young people with CF alongside the perspective of the young person with CF [32, 34, 36], and one study included the views of healthcare professionals [39]. Three of the included studies were written by the same lead author [34, 35]. See Table 1 for an overview of included studies.

## Risk of bias

An overview of the quality of the included studies is presented in Table 2. Seven of the studies were considered to be of moderate quality, and one of the studies was considered to be of high quality.



## Thematic synthesis

Thematic synthesis identified nine main themes that encompass motives for physical activity, and barriers to and facilitators of physical activity. These main themes were: 1) perceptions of physical activity, 2) value for physical activity, 3) social influences, 4) competing priorities, 5) fluctuating health, 6) normality, 7) control beliefs, 8) coping strategies, and 9) availability of facilities. The data provided below are quotes from the participants who had taken part in the primary studies and were reported by the authors of the included studies to illustrate their findings.

### *Perceptions of Physical activity*

Within the eight papers, positive and negative perceptions of physical activity were considered to be influential in engagement with physical activity [33, 36, 37, 39]. Positive perceptions included enjoyment, mastery, and autonomy; and appeared to be highly influenced by previous experiences of physical activity, the health of the individual, and the social environment in which physical activity was performed. A sense of “fun” and “enjoyment” appeared to be important for sustained physical activity [35, 37]; as evidenced by one participant in the study by Swisher et al who states; *“I want to exercise because I like doing the activities... they are fun... I feel good after”* (p110). Likewise, perceptions of “energy” versus “work” were influential; with individuals who report feeling “energetic” and “empowered” after activity more likely to report continued physical activity [37].

Participants who had positive perceptions of physical activity also often reported mastery experiences; mentioning the building of a sense of competence and achievement [35]. One participant in the study by Moola et al [35] describes how her preferred activity (dance) *“is really exciting. There is a lot of anticipation leading up to it. I like working hard to achieve*

1  
2  
3 *things*" (P52). In contrast, negative perceptions of physical activity appeared to decrease  
4  
5 motivation for physical activity. Unpleasant sensations such as discomfort, muscle soreness,  
6  
7 fatigue, joint pain and breathlessness [36, 39], and a lack of enjoyment or boredom [37]  
8  
9 were reported. As an example, one participant in the study by Shelley et al [39] dislikes the  
10  
11 way exercise *"gives you the pains the next day. Like you're dragging your legs up the stairs*  
12  
13 *the next day"* (P340). Feelings of self-consciousness resulted in young people feeling  
14  
15 exposed and vulnerable [38], despondent [43], and anxious to avoid physical activity [38].  
16  
17 Negative perceptions of physical activity appeared to be exacerbated by CF and symptoms  
18  
19 of CF (e.g., tiredness, breathlessness) [35, 39]; as highlighted by a quote from a participant  
20  
21 in Moola et al's [35] study: *"I know enough times from being sick and trying to run on the*  
22  
23 *treadmill... so then I say, 'if I am going to be tired, then why do it?'"* (P54).  
24  
25  
26  
27  
28  
29

### 30 ***Value attributed to physical activity***

31  
32  
33 Included studies presented individuals as placing high or low value on physical activity.  
34  
35 Physical activity was considered to be important for improving general health for both  
36  
37 young people with CF [36, 37] and their families [34]. It was also viewed as critical for the  
38  
39 management of CF; both in terms of preventing or delaying deterioration and in managing  
40  
41 symptoms [34, 36, 37, 39]. As an example, one participant in Swisher's [37] study described  
42  
43 how physical activity *"helps my lungs and stuff...it helps me breathe better...it keeps me*  
44  
45 *active so I could always run around"* (P110). However, this only appeared to be the case for  
46  
47 those who enjoyed physical activity; and found they felt better after activity. For those who  
48  
49 did not enjoy PA, the unpleasantness associated with physical activity appeared to outweigh  
50  
51 any positive associations.  
52  
53  
54  
55  
56  
57  
58  
59  
60

1  
2  
3 The role of physical activity in psychological health was not mentioned as frequently as its  
4 contribution to physical health; only being noted as important in one study [37]. Despite  
5 being aware of the benefits of physical activity, some young people with CF placed no value  
6 on physical activity – particularly if it was perceived to be unpleasant [35]. Indeed, health  
7 improvement and CF management were not sufficiently motivational for those who were  
8 not active; with one participant in the study by Moola et al [35] acknowledging that:

9  
10  
11  
12  
13  
14  
15  
16  
17  
18 *“[physical activity] should be higher on the priority list.... But because I know that it is hard, I*  
19 *do not want to make myself work hard” (P54).*

### 22 **Social influences**

23  
24 All studies included in the review highlighted the role of the parents /care providers in  
25 influencing physical activity behaviour. Parents were described as knowledgeable about the  
26 role played by physical activity in the health of their child [32, 35], and appeared to play a  
27 key role in acting as strong physical activity role models [34-36]. This included providing  
28 children with the skills they need to be active [36] providing tangible support [32, 39],  
29 planning, structuring activities and overcoming barriers [32, 35, 36] providing opportunities  
30 for physical activity, and providing encouragement and motivation [35, 36, 39]. For example,  
31 one parent in Fereday’s study [32] describing a willingness to drive her daughter to a dance  
32 class (an hour round trip) five nights a week because *“we are relieved she loves dancing so*  
33 *much because it is something she can do all year round, it's indoors, dry and warm” (P6).*

34  
35  
36  
37  
38  
39  
40  
41  
42  
43  
44  
45  
46  
47  
48  
49  
50  
51  
52  
53  
54  
55  
56  
57  
58  
59  
60  
61  
62  
63  
64  
65  
66  
67  
68  
69  
70  
71  
72  
73  
74  
75  
76  
77  
78  
79  
80  
81  
82  
83  
84  
85  
86  
87  
88  
89  
90  
91  
92  
93  
94  
95  
96  
97  
98  
99  
100  
101  
102  
103  
104  
105  
106  
107  
108  
109  
110  
111  
112  
113  
114  
115  
116  
117  
118  
119  
120  
121  
122  
123  
124  
125  
126  
127  
128  
129  
130  
131  
132  
133  
134  
135  
136  
137  
138  
139  
140  
141  
142  
143  
144  
145  
146  
147  
148  
149  
150  
151  
152  
153  
154  
155  
156  
157  
158  
159  
160  
161  
162  
163  
164  
165  
166  
167  
168  
169  
170  
171  
172  
173  
174  
175  
176  
177  
178  
179  
180  
181  
182  
183  
184  
185  
186  
187  
188  
189  
190  
191  
192  
193  
194  
195  
196  
197  
198  
199  
200  
201  
202  
203  
204  
205  
206  
207  
208  
209  
210  
211  
212  
213  
214  
215  
216  
217  
218  
219  
220  
221  
222  
223  
224  
225  
226  
227  
228  
229  
230  
231  
232  
233  
234  
235  
236  
237  
238  
239  
240  
241  
242  
243  
244  
245  
246  
247  
248  
249  
250  
251  
252  
253  
254  
255  
256  
257  
258  
259  
260  
261  
262  
263  
264  
265  
266  
267  
268  
269  
270  
271  
272  
273  
274  
275  
276  
277  
278  
279  
280  
281  
282  
283  
284  
285  
286  
287  
288  
289  
290  
291  
292  
293  
294  
295  
296  
297  
298  
299  
300  
301  
302  
303  
304  
305  
306  
307  
308  
309  
310  
311  
312  
313  
314  
315  
316  
317  
318  
319  
320  
321  
322  
323  
324  
325  
326  
327  
328  
329  
330  
331  
332  
333  
334  
335  
336  
337  
338  
339  
340  
341  
342  
343  
344  
345  
346  
347  
348  
349  
350  
351  
352  
353  
354  
355  
356  
357  
358  
359  
360  
361  
362  
363  
364  
365  
366  
367  
368  
369  
370  
371  
372  
373  
374  
375  
376  
377  
378  
379  
380  
381  
382  
383  
384  
385  
386  
387  
388  
389  
390  
391  
392  
393  
394  
395  
396  
397  
398  
399  
400  
401  
402  
403  
404  
405  
406  
407  
408  
409  
410  
411  
412  
413  
414  
415  
416  
417  
418  
419  
420  
421  
422  
423  
424  
425  
426  
427  
428  
429  
430  
431  
432  
433  
434  
435  
436  
437  
438  
439  
440  
441  
442  
443  
444  
445  
446  
447  
448  
449  
450  
451  
452  
453  
454  
455  
456  
457  
458  
459  
460  
461  
462  
463  
464  
465  
466  
467  
468  
469  
470  
471  
472  
473  
474  
475  
476  
477  
478  
479  
480  
481  
482  
483  
484  
485  
486  
487  
488  
489  
490  
491  
492  
493  
494  
495  
496  
497  
498  
499  
500  
501  
502  
503  
504  
505  
506  
507  
508  
509  
510  
511  
512  
513  
514  
515  
516  
517  
518  
519  
520  
521  
522  
523  
524  
525  
526  
527  
528  
529  
530  
531  
532  
533  
534  
535  
536  
537  
538  
539  
540  
541  
542  
543  
544  
545  
546  
547  
548  
549  
550  
551  
552  
553  
554  
555  
556  
557  
558  
559  
560  
561  
562  
563  
564  
565  
566  
567  
568  
569  
570  
571  
572  
573  
574  
575  
576  
577  
578  
579  
580  
581  
582  
583  
584  
585  
586  
587  
588  
589  
590  
591  
592  
593  
594  
595  
596  
597  
598  
599  
600  
601  
602  
603  
604  
605  
606  
607  
608  
609  
610  
611  
612  
613  
614  
615  
616  
617  
618  
619  
620  
621  
622  
623  
624  
625  
626  
627  
628  
629  
630  
631  
632  
633  
634  
635  
636  
637  
638  
639  
640  
641  
642  
643  
644  
645  
646  
647  
648  
649  
650  
651  
652  
653  
654  
655  
656  
657  
658  
659  
660  
661  
662  
663  
664  
665  
666  
667  
668  
669  
670  
671  
672  
673  
674  
675  
676  
677  
678  
679  
680  
681  
682  
683  
684  
685  
686  
687  
688  
689  
690  
691  
692  
693  
694  
695  
696  
697  
698  
699  
700  
701  
702  
703  
704  
705  
706  
707  
708  
709  
710  
711  
712  
713  
714  
715  
716  
717  
718  
719  
720  
721  
722  
723  
724  
725  
726  
727  
728  
729  
730  
731  
732  
733  
734  
735  
736  
737  
738  
739  
740  
741  
742  
743  
744  
745  
746  
747  
748  
749  
750  
751  
752  
753  
754  
755  
756  
757  
758  
759  
760  
761  
762  
763  
764  
765  
766  
767  
768  
769  
770  
771  
772  
773  
774  
775  
776  
777  
778  
779  
780  
781  
782  
783  
784  
785  
786  
787  
788  
789  
790  
791  
792  
793  
794  
795  
796  
797  
798  
799  
800  
801  
802  
803  
804  
805  
806  
807  
808  
809  
810  
811  
812  
813  
814  
815  
816  
817  
818  
819  
820  
821  
822  
823  
824  
825  
826  
827  
828  
829  
830  
831  
832  
833  
834  
835  
836  
837  
838  
839  
840  
841  
842  
843  
844  
845  
846  
847  
848  
849  
850  
851  
852  
853  
854  
855  
856  
857  
858  
859  
860  
861  
862  
863  
864  
865  
866  
867  
868  
869  
870  
871  
872  
873  
874  
875  
876  
877  
878  
879  
880  
881  
882  
883  
884  
885  
886  
887  
888  
889  
890  
891  
892  
893  
894  
895  
896  
897  
898  
899  
900  
901  
902  
903  
904  
905  
906  
907  
908  
909  
910  
911  
912  
913  
914  
915  
916  
917  
918  
919  
920  
921  
922  
923  
924  
925  
926  
927  
928  
929  
930  
931  
932  
933  
934  
935  
936  
937  
938  
939  
940  
941  
942  
943  
944  
945  
946  
947  
948  
949  
950  
951  
952  
953  
954  
955  
956  
957  
958  
959  
960  
961  
962  
963  
964  
965  
966  
967  
968  
969  
970  
971  
972  
973  
974  
975  
976  
977  
978  
979  
980  
981  
982  
983  
984  
985  
986  
987  
988  
989  
990  
991  
992  
993  
994  
995  
996  
997  
998  
999  
1000

Parental support could be detrimental to physical activity behaviour if parents were  
sedentary [34-36] or overbearing [39]. This is demonstrated by a quote from a participant in  
Shelley’s study [39] in which the participant states *“I did a mile on the treadmill the other  
day, and Dad was like, ‘No, you’re going to do another one... (I feel like) I’m going to slap*

1  
2  
3 *him. Push him off his bike. You do another mile”* (P340). Parents themselves were aware of  
4  
5 the impact of their physical activity on their child’s physical activity behaviour; although  
6  
7 often struggled to motivate themselves and their child to be active, with one parent  
8  
9 participant in Happ’s study [36] reporting that *“It is hard for me to make him exercise just*  
10  
11 *because I don’t, I guess”* (P309).  
12  
13  
14  
15

16 The role of social comparison was strongly noted by two of the eight studies [38, 39].  
17  
18 Interestingly, social comparison could be motivational; with young people reporting  
19  
20 increased efforts to ensure that they were able to “keep up” with their peers [39]. For  
21  
22 example, one participant in Shelley’s study [39] describes how *“When I can do what my*  
23  
24 *mates are doing I just feel better, because I know that it doesn’t show that it’s affecting me,*  
25  
26 *and I can keep up with my mates and just do all the exercise”* (P340). In contrast, not being  
27  
28 able to keep up with peers [34, 38] and / or needing to take regular breaks [38] could lead  
29  
30 to embarrassment [38], anger and frustration [39]; making adolescents ‘stand out’ –  
31  
32 something they appear motivated to avoid [38]. This was exacerbated by negative  
33  
34 comments or treatment by others; including teachers and coaches [32, 34] and members of  
35  
36 the public [38]. Indeed, one participant in Moola’s study [35] describes feeling that CF  
37  
38 precludes him from sport:  
39  
40  
41  
42  
43  
44

45 *“I feel small, I feel skinny. I do not feel like I fit in with other kids... and they think that I am*  
46  
47 *bad and that I have some disease . . . they talk rudely about me to themselves . . . if it (sports*  
48  
49 *programs) is for kids that are not sick—there is no point in going. It is all healthy kids, and*  
50  
51 *they are active, and it is a place for them”* (P55).  
52  
53  
54

55 Four of the eight studies reported a beneficial effect of positive friendship groups on  
56  
57 physical activity behaviour [32, 34, 35, 39]; either through providing support [32, 39], or  
58  
59  
60

1  
2  
3 making activity more enjoyable [35, 39]. One study reported how participation in physical  
4 activity could even extend the young persons' social group [32]; with participants describing  
5 how they had made friends through various activities. Shelley et al [39] present a quote  
6 from a young person with CF who uses humour when her CF prevents her from being as  
7 active as her friends:  
8  
9

10  
11 *"Like one of us wins a race or wins a game or something, I can go, 'Oh yes, well, I've got CF',*  
12 *and then it's like pulling a CF card...I just find it funny, because they're like, 'aaaaaah! She's*  
13 *done it again'...we have a laugh about it...." (P370).*  
14  
15

### 16 **Competing priorities**

17  
18 Of the eight included studies, a lack of time for physical activity due to competing priorities  
19 was mentioned in three [34-36]. Busy schedules were reported as a barrier, particularly  
20 when taking into account an already burdensome treatment regime [36]. Participants in the  
21 study by Moola et al [35] described how physiotherapy "robbed them of time" that would  
22 otherwise have been used for physical activity; *"I know that I need to do physical activity,*  
23 *but it is just sometimes hard when things interfere, like medicine or PEP" (P556).*  
24  
25

26  
27 For others, limited time prohibited physical activity because they would rather spend the  
28 time doing something meaningful and enjoyable for them (such as seeing friends) [35]. As a  
29 lack of time due to treatment, one study described how participants alluded to a lack of  
30 time in a symbolic sense [35]. Within this study, participants presented concerns that "time  
31 was running out" due to a shortened lifespan. This increased the pressure to achieve  
32 significant milestones (e.g., attaining a career, getting married etc) within a shortened  
33 lifespan [35].  
34  
35  
36  
37  
38  
39  
40  
41  
42  
43  
44  
45  
46  
47  
48  
49  
50  
51  
52  
53  
54  
55  
56  
57  
58  
59  
60

### ***Fluctuating health***

Ill health could prevent physical activity either through illness exacerbations, or exacerbations of symptoms [32, 33, 35, 37, 39]. Indeed, serious or disruptive events such as hospitalisation and infections could deter even the most motivated of people [32, 33]; with a participant in Moola et al's study [35] describing how draining physical activity can be when sick: *"when I am really sick, I even find brushing my teeth difficult"* (P54).

Symptoms, such as breathlessness, fatigue, and coughing exacerbated the perceived unpleasantness associated with physical activity; leading to avoidance of activity whenever possible [34, 37, 39]. In contrast, relative "wellness" appeared to inspire some to be more active [39], with one participant from Shelley's study [39] describing that he is active because: *"I am generally quite well, I can do it... I tend to have quite a high lung function, and I don't really get ill a lot..."*(P340). Depression, although not a strong theme, was an issue raised in two studies [33, 35] as potentially having a detrimental impact on physical activity. In particular, Moola et al [33] presents a quote from a participant describing how her decline in activity signifies a decline in her health:

*"I also know that I am not going to live as long as everybody else so that is hard. I feel like it is out of my control, I feel helpless, how I used to be able to do it (physical activity), and now I can't. It is kind of depressing. It makes me think that it is a progressive disease, and it make me think that it is getting worse . . . it makes me worried"* (P55).

### ***Normality***

The concept of normality was highlighted in four of the eight studies [34, 35, 38, 39].

Normality appeared to be both a motive for physical activity [38, 39], as well as a barrier to physical activity [33, 34]. For some, physical activity was used to provide an opportunity for

1  
2  
3 the young people to feel normal. It provided a window within which they considered  
4 themselves to be 'just like everyone else' [38, 39]. Physical activity appeared to minimise  
5 differences between themselves and those without CF. For example, Street et al [38]  
6 present a quote from one participant who states: *"If anything, it makes me feel more  
7 normal because everyone should do exercise... yeah, makes me feel normal"* (P266).

8  
9  
10 Interestingly, whilst some were of the opinion that physical activity was something that  
11 everyone should be doing [38], others felt that having CF singled them out as having to be  
12 active in a way that others did not [33]. Feelings of abnormality appeared to be particularly  
13 related to feelings of self-consciousness [33, 34, 38]. Physical activity appeared to  
14 accentuate the extent to which some young people felt thin, or body conscious, or "not  
15 good at sport" compared with their peers [33, 34, 38]. Indeed, one parent participant in  
16 Moola et al's study [34] describes how her son: *"wonders if he is different... He avoids team  
17 sports where you need a big size... but he does care"* (P606).

### 18 **Control beliefs**

19 Individual differences in perceptions relating their ability to control or manage their  
20 condition appeared to influence participants' use of active or passive coping strategies.  
21 Whilst CF is a chronic condition that cannot be cured, individuals varied in the extent to  
22 which they viewed CF as something that could be controlled and managed. Those who  
23 adopted a fatalistic approach; i.e., were of the opinion that there was nothing that they  
24 could do to *cure* CF, were less motivated to adopt positive self-care behaviours such as  
25 physical activity [33, 35]. For example, one participant in Moola et al's study [33] describes  
26 how her inability to cure her CF makes her unwilling to adopt certain selfcare behaviours:  
27  
28  
29  
30  
31  
32  
33  
34  
35  
36  
37  
38  
39  
40  
41  
42  
43  
44  
45  
46  
47  
48  
49  
50  
51  
52  
53  
54  
55  
56  
57  
58  
59  
60

1  
2  
3 *“If there was something that would get rid of CF, I would do it all the time [laughing]! It is*  
4 *not like that.... It’s like ‘I have to do this for the rest of my life? Screw it! Who cares! I am not*  
5 *going to do it anymore” (P36).*  
6  
7  
8  
9

10  
11 In contrast, a second group of participants were of the opinion that they were in control of  
12 their CF, and reported that having CF did not need to stop them or prevent them from doing  
13 anything [32, 35, 39], provided they put their minds to it. In particular, one participant in  
14 Shelley’s study [39] states that: *“I know just because I’ve got CF doesn’t mean I can’t do it”*  
15 *(P340).*  
16  
17  
18  
19  
20  
21  
22

### 23 ***Coping Strategies***

24  
25 Strategies for overcoming barriers to physical activity included both functional and  
26 dysfunctional coping strategies. Studies discussed how participants had integrated  
27 strategies for dealing with symptoms, such as slowing down, or resting when necessary [32].  
28  
29 To deal with structural barriers, people with CF [38] and their parents [32] had a variety of  
30 strategies; often involving elaborate planning [32]. For those who were self-conscious of  
31 symptoms reported tactics such as avoiding physical activity in public places [38]. One  
32 participant in the study by Street et al [38] describes avoiding exercise in public places  
33 because: *“we obviously have to push ourselves, to the point we are coughing a lot and I*  
34 *don’t want to cough it up in front people ... they’ll think she’s going to keel over or*  
35 *something. So nah, I’d rather keep myself to myself with exercise” (P267).*  
36  
37  
38  
39  
40  
41  
42  
43  
44  
45  
46  
47  
48  
49

50  
51 Others had strategies for dealing with difficult emotions [38], such as fear and  
52 embarrassment [38]. In particular, Street et al [38] present a quote from a participant  
53 describing their approach to dealing with embarrassing situations:  
54  
55  
56  
57  
58  
59  
60



1  
2  
3 *“If you’re in the gym, if you aren’t feeling too well and you start coughing... it can be a bit*  
4 *embarrassing, but just go to the changing room, cough it out there, and then come back in*  
5 *and carry on. And, you know, the gym’s pretty all right ... everyone is there to be exercising;*  
6 *don’t really take much notice of anybody else, to be honest” (P267).*  
7  
8  
9  
10  
11  
12

13 However, for some, avoidance of physical activity was the preferred method of coping with  
14 any negative consequences of physical activity [38]. Indeed, one participant in Street et al’s  
15 [38] study describes how the embarrassment she feels during activities prevents her from  
16 persevering: *“... Just embarrassment really that I can’t do it. I can’t do as much as other*  
17 *people can. That’s it really. If I was perfectly healthy, I think I probably would, because I*  
18 *enjoy going swimming and stuff and I enjoy sort of dancing but it’s just that I can’t do it. So, I*  
19 *just don’t even try” (P266).*  
20  
21  
22  
23  
24  
25  
26  
27  
28  
29  
30

### 31 ***Facilities and opportunities***

32  
33 Finally, availability of facilities was considered to have an impact on physical activity  
34 behaviour [36, 39, 42]. Good access to local community facilities (e.g., swimming pools,  
35 sports centres) and private clubs were reported to increase physical activity among young  
36 people with CF [39]. Having the opportunity to walk to school was also considered to  
37 promote autonomy for physical activity [39]. In contrast, lack of access to “different”  
38 facilities, or opportunities to try new and exciting activities were mentioned as barriers to  
39 physical activity [39]. The emphasis here appeared to be not on the availability per se, but  
40 on the availability of facilities that were not considered to be boring; for example, one  
41 participant in Shelley’s study [39] described a limited range of facilities for different sports:  
42 *“A few more different clubs that do different sports that are around, because there isn’t*  
43 *many” (P340).* However, facilities and opportunities for physical activity appeared to be  
44  
45  
46  
47  
48  
49  
50  
51  
52  
53  
54  
55  
56  
57  
58  
59  
60

1  
2  
3 influenced by seasonal variation; with more young people reportedly being more active in  
4  
5 the summer months [36].  
6  
7

## 8 **Discussion**

9  
10  
11 The aim of this systematic review was to examine and synthesize the qualitative literature  
12  
13 on the barriers of and facilitators to physical activity among young people with CF. In  
14  
15 contrast to previous reviews, the current review used systematic methods to identify and  
16  
17 retrieve all relevant research. Our analysis highlights multiple influences on physical activity  
18  
19 behaviour; including how physical activity and cystic fibrosis are viewed by young people  
20  
21 with CF, the value placed on physical activity by young people and their families, and the  
22  
23 physical environment in which activity occurs. Highly valuing and/or enjoying physical  
24  
25 activity, having an active family, having relatively stable health- or the perception that CF  
26  
27 does not need to prevent physical activity, and using physical activity as a vehicle to  
28  
29 normality, appeared to facilitate engagement with physical activity. Fluctuating health  
30  
31 status increased the potential for negative perceptions of physical activity, alongside low  
32  
33 value for physical activity, sedentary or overbearing families, low perception of control over  
34  
35 CF, and use of passive coping strategies appeared to hinder engagement in physical activity.  
36  
37 Systematic reviews have shown that beliefs relating to the extent to which conditions (and  
38  
39 associated symptoms) can be cured or control influence behaviour among multiple  
40  
41 populations [40] including individuals with CF [41, 42]. The current review provides evidence  
42  
43 to show that such beliefs are also influential in physical activity CF behaviour. CF cannot be  
44  
45 cured, and this at times led to reports of despondency and feelings of hopelessness. In these  
46  
47 circumstances, engagement in physical activity was viewed as “pointless” given that it could  
48  
49 not cure the condition. Beliefs relating to the controllability of symptoms during physical  
50  
51  
52  
53  
54  
55  
56  
57  
58  
59  
60

1  
2  
3 activity could also lead to avoidance of physical activity. In contrast, individuals who felt in  
4 control of their CF and able to prevent or manage their symptoms – even during activity –  
5  
6 were more likely to have reported developing strategies to enable them to be active. These  
7  
8 findings indicate that identifying and modifying beliefs about the controllability of CF may  
9  
10 facilitate attempts to promote physical activity.  
11  
12  
13  
14

15  
16 The concept of “normality” is often used to explain the extent to which people adapt to or  
17  
18 accept life with a chronic condition [43-45]. The term is most frequently used to describe  
19  
20 the process of adjustment following a diagnosis of a chronic condition (e.g., cancer) [43],  
21  
22 and numerous typologies of normality have been proposed [46, 47]. For example,  
23  
24 individuals may develop a “normality” in which the condition is integrated and accepted  
25  
26 [46]. At the other end of the spectrum, individuals accept a disrupted normality in which  
27  
28 maintaining a normal life is rejected due to the overwhelming disruptions caused by the  
29  
30 condition. Situated between these extremes are a group of individuals who strive to present  
31  
32 a “normal life” despite the severity of symptoms or disruption [44]. Whilst this literature is  
33  
34 usually referring to individuals with a biographical disruption [46], the concept still appears  
35  
36 to be relevant to individuals with CF. The eight studies included in this review provide  
37  
38 examples of individuals for whom normality includes their CF. Such individuals were able to  
39  
40 partake in physical activity through adaptations when necessary (e.g., resting, or slowing the  
41  
42 pace of the activity). There were also examples of individuals who, in an attempt to appear  
43  
44 normal, would avoid activity due to its potential to accentuate differences between the  
45  
46 young person with CF and their peers. However, within the current review there were a  
47  
48 group of individuals who used physical activity as a way of enabling normality; engaging in  
49  
50 physical activity because it made them feel normal. Whilst this review has highlighted the  
51  
52  
53  
54  
55  
56  
57  
58  
59  
60

1  
2  
3 influence of perceptions of normality in physical activity behaviour, further exploration of  
4 this concept in relation to individuals with CF is clearly needed.  
5  
6  
7

8 Perceiving physical activity as fun, enjoyable, and enhancing autonomy appeared to be  
9 more important for long term engagement in physical activity, than the associated health  
10 benefits. This is consistent with self-determination theory [48]; which suggests that  
11 motivation for a particular activity can be either intrinsic or extrinsic. Intrinsic motivation  
12 describes engagement in activities for the pleasure or satisfaction it provides. Extrinsic  
13 motivation, in contrast, describes motivation for activities for an external outcome; for  
14 example, avoiding ill health, or pressure from healthcare professionals. Whilst intrinsic  
15 motivation is the most autonomous form of motivation, extrinsic motivation may be more  
16 or less autonomous. Motivation that is not autonomous is less likely to be sustained over  
17 time [49]. Self-determination theory has informed the development of a multitude of  
18 successful interventions aiming to promote physical activity among a wide range of  
19 populations [50-52], and the current research highlights that use of this theory in informing  
20 interventions to support physical activity among individuals with CF may also be beneficial.  
21  
22  
23  
24  
25  
26  
27  
28  
29  
30  
31  
32  
33  
34  
35  
36  
37  
38  
39

40 The role of the family in influencing perceptions of physical activity and physical activity  
41 behaviour among young people is widely accepted [53]. Studies included in the present  
42 review provide additional support for the role of the family in acting as role models and  
43 providing tangible and emotional support to promote and maintain physical activity.  
44  
45  
46  
47  
48  
49

50 However, in order to support young people to be active, families must have the necessary  
51 knowledge regarding the importance of physical activity, in addition to knowing how to  
52 support young people to be active. They must also have the physical and psychological  
53 capacity to be able to support young people to be active; and this could be a challenge when  
54  
55  
56  
57  
58  
59  
60

1  
2  
3 taking into consideration the stress and emotional consequences of having a young child  
4  
5 with a chronic condition. Indeed, some parents reported using physical activity to manage  
6  
7 their own stress and anxiety. This strongly supports a strategy that involving families in  
8  
9 attempts to promote physical activity among young people with CF is critical.  
10  
11

### 12 13 **Strengths and limitations**

14  
15  
16 The main strength of this work is that it brings together the qualitative literature that has  
17  
18 provided an in-depth account of the barriers and facilitators to physical activity among  
19  
20 young people with CF. To our knowledge, this is the first systematic review and meta-  
21  
22 synthesis to do so for this population. Through synthesising this work, we have presented  
23  
24 barriers and facilitators to physical activity among a wider sample of young people with CF  
25  
26 than could be obtained through individual qualitative studies alone, and with greater depth  
27  
28 than can be obtained through quantitative studies.  
29  
30  
31

32  
33  
34 Sixteen potentially relevant studies were only reported in abstract format. Although we  
35  
36 contacted authors to request full unpublished reports where available, none had plans to  
37  
38 develop manuscripts of their work in time for the work to be included in this review. Whilst  
39  
40 the included studies were of moderate to high quality, reflexivity was often poorly  
41  
42 described. Future studies should provide greater detail about the relationship between the  
43  
44 researcher and the research process. As three of the studies included in the review were  
45  
46 authored by one research team, this may reflect a smaller distribution of participants,  
47  
48 potentially reducing the transferability of findings.  
49  
50  
51  
52  
53

### 54 **Implications for research and practice**

55  
56  
57 This review provides further support for the idea that individuals with CF are likely to  
58  
59 engage with activities that are fun and enjoyable rather than focusing exclusively on the  
60

1  
2  
3 health benefits of physical activity. In order to promote long-term, sustainable engagement  
4  
5 with physical activity, healthcare professionals should encourage young people to support  
6  
7 young people to identify activities that they find enjoyable, rather than focusing exclusively  
8  
9 on the health benefits associated with physical activity. Involving families in the process  
10  
11 could also be beneficial; as families are able to provide tangible and emotional support, as  
12  
13 well as dealing with organisational demands. However, this review also identified a range of  
14  
15 psychosocial issues, such as stress and poor coping skills that may hinder physical activity  
16  
17 among young people and their families. Engagement in physical activity is likely to increase  
18  
19 if healthcare professionals can facilitate a supportive environment in which physical activity  
20  
21 can occur. This could necessitate dealing with psychological issues (e.g., stress or coping  
22  
23 skills) before attempting to promote physical activity.  
24  
25  
26  
27  
28

29  
30 The number of potentially relevant articles identified through our search strategy implies  
31  
32 that promotion of physical activity is an important topic and of interest to clinical care  
33  
34 teams. We had to reject sixteen potentially relevant documents as they were only available  
35  
36 in abstract form. Developing methods for sharing or disseminating this data would be  
37  
38 beneficial as it would ensure that researchers do not duplicate work that has already been  
39  
40 completed and would also allow completed work to be included in systematic reviews or  
41  
42 synthesis so that they may be used to inform clinical practice.  
43  
44  
45  
46  
47

## 48 **Conclusions**

49  
50  
51 In summary, this is the first synthesis of qualitative work that has explored barriers and  
52  
53 facilitators to physical activity among young people with CF. Previous reviews have been  
54  
55 unable to identify intervention characteristics that influence physical activity behaviour. It is  
56  
57 therefore unclear how best to support physical activity among this population. This review  
58  
59  
60

1  
2  
3 provides detailed information on the physical, psychological and social influences of physical  
4  
5 activity behaviour, thus providing numerous targets for future interventions. Identifying and  
6  
7 targeting issues at any of these levels could facilitate promotion of physical activity among  
8  
9 this population.  
10  
11  
12  
13  
14  
15  
16  
17  
18  
19  
20  
21  
22  
23  
24  
25  
26  
27  
28  
29  
30  
31  
32  
33  
34  
35  
36  
37  
38  
39  
40  
41  
42  
43  
44  
45  
46  
47  
48  
49  
50  
51  
52  
53  
54  
55  
56  
57  
58  
59  
60

For peer review only

## References

1. The Cystic Fibrosis Foundation. About Cystic Fibrosis. 2017. Available from <https://www.cff.org/What-is-CF/About-Cystic-Fibrosis/>
2. The Cystic Fibrosis Trust. UK Cystic Fibrosis Registry 2016 Annual Data Report. London. The Cystic Fibrosis Trust; 2017.
3. The Cystic Fibrosis Trust. Cystic Fibrosis Insight Survey - Report on the 2017 and 2018 surveys. London. The Cystic Fibrosis Trust; 2018.
4. The Cystic Fibrosis Trust. Standards of care and good clinical practice for the physiotherapy management of cystic fibrosis. Third edition. London, The Cystic Fibrosis Trust; 2017.
5. Pianosi, P., Leblanc, J., and Almudevar, A. Peak oxygen uptake and mortality in children with cystic fibrosis. *Thorax*, 2005. **60**(1): p. 50-4.
6. Radtke, T., Nolan, S., Hebestreit, H., and Kriemler, S. Physical exercise training for cystic fibrosis. *Cochrane Database of Systematic Reviews*, 2017. **11**: p. CD002768.
7. Gulmans, V.A., de Meer, K., Brackel, H.J., Faber, J.A., Berger, R., Helders, P.J. Outpatient exercise training in children with cystic fibrosis: physiological effects, perceived competence, and acceptability. *Pediatric Pulmonology*, 1999. **28**(1): p. 39-46.
8. Orenstein, D.M., Hovell, M.F., Mulvihill, M., Keating, K.K., Hofstetter, C.R., Kelsey, S., Morris, K., Nixon, P.A. Strength vs aerobic training in children with cystic fibrosis: a randomized controlled trial. *Chest*, 2004. **126**(4): p. 1204-14.



- 1  
2  
3 9. Barak, A., Wexler, I.D., Efrati, O., Bentur, L., Augarten, A., Mussaffi, H., Avital, A.,  
4  
5 Rivlin, J., Aviram, M., Yahav, Y., Kerem, E. Trampoline use as physiotherapy for  
6  
7 cystic fibrosis patients. *Pediatric Pulmonology*, 2005. **39**(1): p. 70-3.  
8  
9
- 10  
11 10. Orava, C., Fitzgerald, J., Figliomeni, S., Lam, D., Naccarato, A., Szego, E., Yoshida,  
12  
13 K., Fox, P., Sykes, J., Wu, K. Relationship between Physical Activity and Fatigue in  
14  
15 Adults with Cystic Fibrosis. *Physiotherapy Canada*, 2018. **70**(1): p. 42-48.  
16  
17
- 18  
19 11. Backstrom-Eriksson, L., Bergsten-Brucefors, A., Hjelte, L., Melin, B., Sorjonen, K.  
20  
21 Associations between genetics, medical status, physical exercise and  
22  
23 psychological well-being in adults with cystic fibrosis. *BMJ open respiratory*  
24  
25 research, 2016. **3**(1): p. e000141.  
26  
27
- 28  
29 12. Denford S; MackIntosh K; McNarry M, Barker, A., Williams C, Promotion of  
30  
31 physical activity for adolescents with cystic fibrosis: A qualitative study of UK  
32  
33 multi-disciplinary cystic fibrosis teams. *Physiotherapy* 2019.  
34  
35
- 36  
37 13. Stevens, D., et al., Oades, P., Armstrong, N., Williams, C. A survey of exercise  
38  
39 testing and training in UK cystic fibrosis clinics. *Journal of Cystic Fibrosis*, 2010.  
40  
41 **9**(5): p. 302-6.  
42  
43
- 44  
45 14. Rowbotham, N. Question CF: A James Lind Alliance Priority Setting Partnership in  
46  
47 cystic fibrosis. *Journal of Cystic Fibrosis*, 2017. **16**(Supplement 1): p. S38.  
48  
49
- 50  
51 15. Rowbotham, N., Smith, S., Leighton, P.A., Raynor, O.C., Gathercole, K., Elliot, Z.C.,  
52  
53 Nash, E.F., Daniels, T., Duff, A.J.A., Collins, S, Chandran, S., People, U., Hurley,  
54  
55 M.N., Brownlee, K., Smyth, A. The top 10 research priorities in cystic fibrosis  
56  
57 developed by a partnership between people with CF and healthcare providers.  
58  
59 *Thorax*, 2018. **73**(4): p. 388-390.  
60

- 1  
2  
3 16. Nixon, P.A., D.M. Orenstein, and S.F. Kelsey, Habitual physical activity in children  
4 and adolescents with cystic fibrosis. *Medicine and Science in Sports and Exercise*,  
5  
6 2001. **33**(1): p. 30-35.  
7  
8  
9
- 10  
11 17. Guthold, R., Stevens, G.A., Riley, L.M., Bull, F.C. Worldwide trends in insufficient  
12  
13 physical activity from 2001 to 2016: a pooled analysis of 358 population-based  
14  
15 surveys with 1.9 millions participants. *The Lancet Global Health*, 2018. **6**(10).  
16  
17
- 18  
19 18. Selvadurai, H.C., Blimkie, C.J., Cooper, P.J., Mellis, C.M., Van Asperen, P.P. Gender  
20  
21 differences in habitual activity in children with cystic fibrosis. *Archives of Disease*  
22  
23 in Childhood, 2004. **89**(10): p. 928-33.  
24  
25
- 26  
27 19. Nixon, P.A., Orenstein, D.M., Kelsey, S.F., Doershuk, C.F. The Prognostic Value of  
28  
29 Exercise Testing in Patients with Cystic-Fibrosis. *New England Journal of*  
30  
31 *Medicine*, 1992. **327**(25): p. 1785-1788.  
32  
33
- 34  
35 20. Cox, N.S., Alison, J.A., Holland, A.E. Interventions to promote physical activity in  
36  
37 people with cystic fibrosis. *Paediatric Respiratory Reviews*, 2014. **15**(3): p. 237-9.  
38  
39
- 40  
41 21. Craig, P., Petticrew, M. Developing and evaluating complex interventions:  
42  
43 Reflections on the 2008 MRC guidance. *International Journal of Nursing Studies*,  
44  
45 2013. **50**(5): p. 585-592.  
46  
47
- 48  
49 22. Michie, S., Johnston, M., Francis, J., Hardeman, W., Eccles, M. From Theory to  
50  
51 Intervention: Mapping Theoretical Derived Behavioural Determinants to  
52  
53 Behaviour Change Techniques. *Applied Psychology*, 2008. **57**(4): p. 660-680.  
54  
55  
56  
57  
58  
59  
60

- 1  
2  
3  
4  
5  
6  
7  
8  
9  
10  
11  
12  
13  
14  
15  
16  
17  
18  
19  
20  
21  
22  
23  
24  
25  
26  
27  
28  
29  
30  
31  
32  
33  
34  
35  
36  
37  
38  
39  
40  
41  
42  
43  
44  
45  
46  
47  
48  
49  
50  
51  
52  
53  
54  
55  
56  
57  
58  
59  
60
23. Prasad, S.A., & Cerny, F.J. Factors that influence adherence to exercise and their effectiveness: application to cystic fibrosis. *Pediatr Pulmonol*, 2002. **34**(1): p. 66-72.
24. Moran, F. and J. Bradley, Incorporating exercise into the routine care of individuals with cystic fibrosis: is the time right? *Expert Rev Respir Med*, 2010. **4**(2): p. 139-42.
25. Rand, S.P., & Prasad, S.A. Exercise as part of a cystic fibrosis therapeutic routine. *Expert Review of Respiratory Medicine*, 2012. **6**(3): p. 341-51.
26. Moher, D., Liberati, A., Tetzlaff, J., Douglas, G., Altman, D.S. Preferred reporting items for systematic reviews and meta-analyses: The PRISMA statement. *Annals of Internal Medicine*, 2009. **151**(4): p. 264-269.
27. Critical Appraisal Skills Programme: Making sense of evidence; 1993. Available from <https://casp-uk.net/>
28. Moolchaem, P., Liamputtong, P., O'Halloran, P., Muhamad, R. The Lived Experience of Transgender Persons: A Meta-Synthesis. *Journal of Gay & Lesbian Social Services*, 2015. **27**(2): p. 143-171.
29. Duggleby, W., Holtslander, L., Kylma, J., Hammond, C., Williams, A. Meta-synthesis of the Hope Experience of Family Caregivers of Persons With Chronic Illness. *Qualitative Health Research*, 2010. **20**(2): p. 148-58.
30. Barnett-Page, E., & Thomas, J. Methods for the synthesis of qualitative research: a critical review. *BMC medical research methodology*, 2009. **9**(1): p. 1.

- 1  
2  
3 31. Thomas, J., & Harden, A. Methods for the thematic synthesis of qualitative  
4 research in systematic reviews. *BMC Medical Research Methodology*, 2008.  
5  
6  
7  
8 **8(45)**.  
9  
10  
11 32. Fereday, J., macDougal, C., Spizzo, M., Darbyshire, P., Schiller, W. "There's  
12 nothing I can't do--I just put my mind to anything and I can do it": a qualitative  
13 analysis of how children with chronic disease and their parents account for and  
14 manage physical activity. *BMC Pediatrics*, 2009. **9**: p. 1.  
15  
16  
17  
18  
19  
20  
21 33. Moola, F.J., & Faulkner, G.E. 'A tale of two cases:' the health, illness, and physical  
22 activity stories of two children living with cystic fibrosis. *Clinical Child Psychology*  
23 & *Psychiatry*, 2014. **19(1)**: p. 24-42.  
24  
25  
26  
27  
28  
29 34. Moola, F.J., Faulkner, G.R., Kirsh, J.A., Schneiderman, J. Developing physical  
30 activity interventions for youth with cystic fibrosis and congenital heart disease:  
31 Learning from their parents. *Psychology of Sport and Exercise*, 2011. **12(6)**: p.  
32 599-608.  
33  
34  
35  
36  
37  
38  
39 35. Moola, F.J., Faulkner, G.E., Schneiderman, J.E. "No time to play": perceptions  
40 toward physical activity in youth with cystic fibrosis. *Adapted Physical Activity*  
41 *Quarterly*, 2012. **29(1)**: p. 44-62.  
42  
43  
44  
45  
46  
47 36. Happ, M.B., Hoffman, L.A., Higgins, L.W., Divirgilio, D., Orenstein, D.M. Parent  
48 and child perceptions of a self-regulated, home-based exercise program for  
49 children with cystic fibrosis. *Nursing Research*, 2013. **62(5)**: p. 305-314.  
50  
51  
52  
53  
54  
55 37. Swisher, A.K., & Erickson, M. Perceptions of physical activity in a group of  
56 adolescents with cystic fibrosis. *Cardiopulmonary Physical Therapy Journal*, 2008.  
57  
58  
59  
60 **19(4)**: p. 107-13.

- 1  
2  
3 38. Street, R., et al., Mercer, J., Mills-Bennett, R., O'Leary, C., Thirlaway, K.  
4  
5 Experiences of physical activity: A phenomenological study of individuals with  
6  
7 cystic fibrosis. *Journal of Health Psychology*, 2016. **21**(2): p. 261-70.  
8  
9  
10  
11 39. Shelley, J., Fairclough, S.J., Knowles, Z.R., Southern, K.W., McCormack, P.,  
12  
13 Dawson, E.A., Graves, L.E.F., Hanlon, C. A formative study exploring perceptions  
14  
15 of physical activity monitoring among children and young people with cystic  
16  
17 fibrosis and health care professionals. *BMC Pediatrics*, 2018. **18**: p. 335.  
18  
19  
20  
21 40. Hagger, M., & Orbell, M. A Meta-Analytic Review of the Common-Sense Model of  
22  
23 Illness Representations. *Psychology & Health*, 2003. **18**(2): p. 141-184.  
24  
25  
26  
27 41. Sylvain, C., Iamothe, L., Berthiaume, Y., Rabasa-Lhoret, R. How patients'  
28  
29 representations of cystic fibrosis-related diabetes inform their health behaviours.  
30  
31 *Psychology & Health*, 2016. **31**(10): p. 1129-1144.  
32  
33  
34  
35 42. Bucks, R.S., Hawkins, K., Skinner, T.C., Horn, S., Seddon, P., Horne, R. Adherence  
36  
37 to treatment in adolescents with cystic fibrosis: The role of illness perceptions  
38  
39 and treatment beliefs. *Journal of Pediatric Psychology*, 2009. **34**(8): p. 893-902.  
40  
41  
42  
43 43. Bury, M. Chronic illness as a biographical disruption. *Sociology of Health and*  
44  
45 *Illness*, 1982. **4**: p. 167-182.  
46  
47  
48 44. Knafl, K., & Deatrick, J. How families manage chronic conditions: An analysis of  
49  
50 the concept of normalisation *Research in Nursing and Health*, 1986. **9**: p. 215.  
51  
52  
53  
54 45. Taylor, M., Gibson, F., Franck, L. The experience of living with a chronic illness  
55  
56 during adolescence: a critical review of the literature *Journal of clinical nursing*,  
57  
58 2008. **17**(23): p. 3083.  
59  
60

- 1  
2  
3  
4  
5  
6  
7  
8  
9  
10  
11  
12  
13  
14  
15  
16  
17  
18  
19  
20  
21  
22  
23  
24  
25  
26  
27  
28  
29  
30  
31  
32  
33  
34  
35  
36  
37  
38  
39  
40  
41  
42  
43  
44  
45  
46  
47  
48  
49  
50  
51  
52  
53  
54  
55  
56  
57  
58  
59  
60
46. Sanderson, T., Calnan, M., Morris, M., Richards, P, Hewlett, S. Shifting normalities: interactions of changing conceptions of a normal life and the normalisation of symptoms in rheumatoid arthritis. *Sociology of Health and Illness*, 2011. **4**: p. 618-33.
47. Frank, A. *The Wounded Story Teller: Body, Illness and Ethics*. 1997, Chicago, IL: Chicago University Press.
48. Deci, E.L., & Ryan, R.M. Intrinsic motivation and self-determination in human behavior. *Perspectives in social psychology*. 1985, New York: Plenum. xv, 371 p.
49. Deci, E., & Ryan, R. Self-determination theory: A macrotheory of human motivation, development and health. *Canadian Psychology/Psychologie canadienne*, 2008. **49**(3): p. 182-185.
50. Russell, K.L., & Bray, S.R. Promoting self-determined motivation for exercise in cardiac rehabilitation: the role of autonomy support. *Rehabil Psychol*, 2010. **55**(1): p. 74-80.
51. Silva, M.N., Vieira, P.N., Coutinho, S.R., Minderico, C.S., Matos, M.G., Sardinha, L.B., Teixeira, P.J. Using self-determination theory to promote physical activity and weight control: a randomized controlled trial in women. *J Behav Med*, 2010. **33**(2): p. 110-22.
52. Sweet, S.N., Fortia, M.S., Strachan, S.M., Blanchard, C.M., Boulay, P. Testing a Longitudinal Integrated Self-Efficacy and Self-Determination Theory Model for Physical Activity Post-Cardiac Rehabilitation. *Health Psychol Res*, 2014. **2**(1): p. 1008.

- 1  
2  
3 53. Brown, H., Atkin, A.J., Panter, J., Wong, G., Chinapaw, M.J., van Sluijs, E.M. Family  
4 based interventions to increase physical activity in children: A systematic review,  
5  
6 based interventions to increase physical activity in children: A systematic review,  
7  
8 meta-analysis and realist synthesis. *Obesity Reviews*, 2016. **17**.  
9  
10  
11  
12  
13  
14  
15  
16  
17  
18  
19  
20  
21  
22  
23  
24  
25  
26  
27  
28  
29  
30  
31  
32  
33  
34  
35  
36  
37  
38  
39  
40  
41  
42  
43  
44  
45  
46  
47  
48  
49  
50  
51  
52  
53  
54  
55  
56  
57  
58  
59  
60

For peer review only

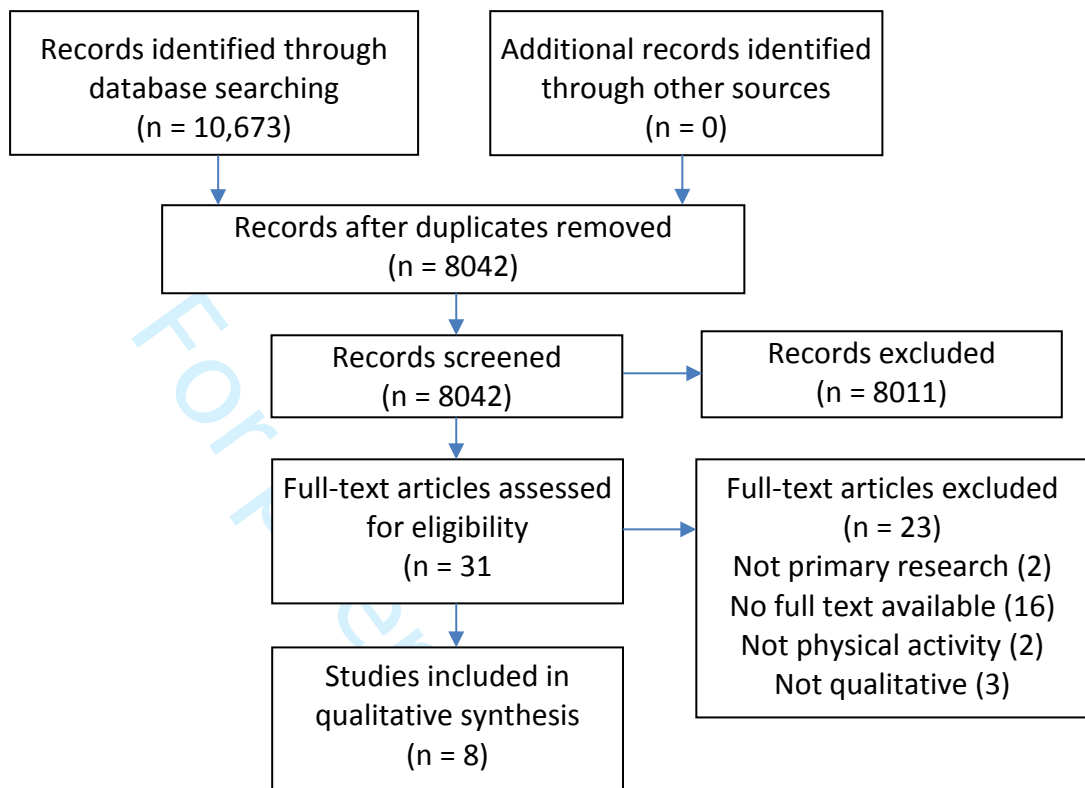

Figure 1. PRISMA flow diagram



1  
2  
3  
4  
5  
6  
7  
8  
9  
10  
11  
12  
13  
14  
15  
16  
17  
18  
19  
20  
21  
22  
23  
24  
25  
26  
27  
28  
29  
30  
31  
32  
33  
34  
35  
36  
37  
38  
39  
40  
41  
42  
43  
44  
45  
46  
47  
48  
49  
50  
51  
52  
53  
54  
55  
56  
57  
58  
59  
60

For peer review only

Table 1: Characteristics of included studies

| Reference       | Location  | Participants                                                                                                          | Data collection                                                                                    | Data analysis                          | Summary of findings                                                                                                                                                                                                                                                                                                                                                                                         |
|-----------------|-----------|-----------------------------------------------------------------------------------------------------------------------|----------------------------------------------------------------------------------------------------|----------------------------------------|-------------------------------------------------------------------------------------------------------------------------------------------------------------------------------------------------------------------------------------------------------------------------------------------------------------------------------------------------------------------------------------------------------------|
| Fereday<br>2009 | Australia | 25 participants (aged 4 to 16 years).<br>Fourteen had a diagnosis of type 1 diabetes, 6 asthma and 5 cystic fibrosis. | A combination of focus groups, interviews, drawing maps, taking photos, and traffic light posters. | Interpretive phenomenological analysis | Children and young people described their active participation in a wide variety of physical activities including organised sports and play but made very little mention of any negative influence or impact due to their disease. Their parents' stories described the diligent background planning and management undertaken to enable their child to participate in a wide range of physical activities. |
| Happ<br>2013    | USA       | Eleven child-parent pairs.<br>Five girls, six boys (aged 10-16 years). All had a                                      | Individual child and parent                                                                        | Thematic analysis                      | Five major thematic categories describing child and parent perceptions and experience of the bicycle exercise program were identified in the transcripts:                                                                                                                                                                                                                                                   |

1  
2  
3  
4  
5  
6  
7  
8  
9  
10  
11  
12  
13  
14  
15  
16  
17  
18  
19  
20  
21  
22  
23  
24  
25  
26  
27  
28  
29  
30  
31  
32  
33  
34  
35  
36  
37  
38  
39  
40  
41  
42  
43  
44  
45  
46

---

diagnosis of CF. interviews, (a) motivators; (b) barriers; (c) effort/work; (d)

Six children were from conducted at exercise routine; (e) sustaining exercise. Research

the experimental group, two months participation, parent-family participation, health

and five from the into the benefits, and the child’s personality traits were

attention-control group. exercise primary motivators. Competing activities, priorities

Parent interview program and and responsibilities were the major barriers to

participants were nine again at six implementing the exercise program as prescribed.

mothers and four months Motivation waned and the novelty wore off for

fathers, ages 29–51 several (approximately half) parent-child dyads,

years. who planned to decrease or stop the exercise

All participants were program after the study ended.

Caucasian.

---

|       |        |                         |            |                     |                                                      |
|-------|--------|-------------------------|------------|---------------------|------------------------------------------------------|
| Moola | Canada | Two children. One male, | Semi       | Case study analysis | The findings beg researchers to consider (a) how     |
| 2014  |        | one female.             | structured |                     | children with life-limiting diseases borrow multiple |

---

1  
2  
3  
4  
5  
6  
7  
8  
9  
10  
11  
12  
13  
14  
15  
16  
17  
18  
19  
20  
21  
22  
23  
24  
25  
26  
27  
28  
29  
30  
31  
32  
33  
34  
35  
36  
37  
38  
39  
40  
41  
42  
43  
44  
45  
46

---

Participants were interviews and illness narrative types, (b) the role of development randomly selected from field notes in influencing the kinds of stories that children can tell, and (c) the impact of illness narratives on an ongoing trial physical activity. By rendering the tales of two CF youth in this study, we respond to Aurthur Frank’s call; taking a multiple narrative turn, we listen to stories of a different kind of suffering.

---

|       |        |                                                                                                                                                   |                            |                 |                                                                                                                                                                                                                                                                                                                                                    |
|-------|--------|---------------------------------------------------------------------------------------------------------------------------------------------------|----------------------------|-----------------|----------------------------------------------------------------------------------------------------------------------------------------------------------------------------------------------------------------------------------------------------------------------------------------------------------------------------------------------------|
| Moola | Canada | Fourteen participants. Ten males, five females (aged 11 to 17). All had a diagnosis of CF. Although the majority of the sample was Caucasian, one | Semi structured interviews | Grounded theory | The participants demonstrated positive or negative perceptions toward physical activity and different experiences—such as parental support and illness narratives—influenced youths’ perceptions. In addition, the participants experienced physical activity within the context of reduced time. Recommendations for developing physical activity |
|-------|--------|---------------------------------------------------------------------------------------------------------------------------------------------------|----------------------------|-----------------|----------------------------------------------------------------------------------------------------------------------------------------------------------------------------------------------------------------------------------------------------------------------------------------------------------------------------------------------------|

---

1  
2  
3  
4  
5  
6  
7  
8  
9  
10  
11  
12  
13  
14  
15  
16  
17  
18  
19  
20  
21  
22  
23  
24  
25  
26  
27  
28  
29  
30  
31  
32  
33  
34  
35  
36  
37  
38  
39  
40  
41  
42  
43  
44  
45  
46

---

participant self-identified  
as Black and the other as  
East Indian.

interventions, including the particular need to  
ensure that such interventions are not perceived as  
wasteful of time, are provided.

---

Moola  
2011

Canada

Twenty-nine parents  
who provided care to a  
CF or CHD child between  
the ages of 10 and 18,  
participated (16 parents  
from the CF clinic and 13  
parents from the CHD  
centre).  
Parents were from a  
range of urban and rural  
locations across Ontario

Semi

structured  
interviews

Thematic analysis

Parents discussed the numerous benefits and  
barriers associated with physical activity for both  
child and self. Role modelling was a critical social  
process to overcoming barriers. Parents  
experiences were situated within the broader  
family context characterized by a prevailing sense  
of stress and complexity.

and Quebec and access

to physical activity

opportunities varied

|         |    |                                                                                                                   |                            |                                        |                                                                                                                                                                                                                                                                                                                                                                                                                                                                                                                                          |
|---------|----|-------------------------------------------------------------------------------------------------------------------|----------------------------|----------------------------------------|------------------------------------------------------------------------------------------------------------------------------------------------------------------------------------------------------------------------------------------------------------------------------------------------------------------------------------------------------------------------------------------------------------------------------------------------------------------------------------------------------------------------------------------|
| Shelley | UK | Nine participants, five female, four male (aged 8 to 16 years). All participants had a confirmed diagnosis of CF. | Semi structured interviews | Interpretive phenomenological analysis | Findings suggest that experiences of PA in children and young people with CF are largely comparable to their non-CF peers, with individuals engaging in a variety of activities. CF was not perceived as a barrier per se, although participants acknowledged that they could be limited by their symptoms. Maintenance of health emerged as a key facilitator, in some cases PA offered patients the opportunity to 'normalise' their condition. Participants reported enjoying wearing the monitoring devices and had good compliance. |
|---------|----|-------------------------------------------------------------------------------------------------------------------|----------------------------|----------------------------------------|------------------------------------------------------------------------------------------------------------------------------------------------------------------------------------------------------------------------------------------------------------------------------------------------------------------------------------------------------------------------------------------------------------------------------------------------------------------------------------------------------------------------------------------|

1  
2  
3  
4  
5  
6  
7  
8  
9  
10  
11  
12  
13  
14  
15  
16  
17  
18  
19  
20  
21  
22  
23  
24  
25

Wrist-worn devices and devices providing feedback were preferred. HCPs recognised the potential benefits of the devices in clinical practice. Recommendations based on these findings are that interventions to promote PA in children and young people with CF should be individualised and involve families to promote PA as part of an active lifestyle. Patients should receive support alongside the PA data obtained from monitoring devices.

26  
27  
28  
29  
30  
31  
32  
33  
34  
35  
36  
37  
38  
39  
40  
41  
42  
43  
44  
45  
46

|        |    |                                                              |                            |                                        |                                                                                                                                                                                                                                                   |
|--------|----|--------------------------------------------------------------|----------------------------|----------------------------------------|---------------------------------------------------------------------------------------------------------------------------------------------------------------------------------------------------------------------------------------------------|
| Street | UK | Twelve participants. Six males and six females (aged 18-46). | Semi structured interviews | Interpretive phenomenological analysis | Three super-ordinate themes were identified: 'self-awareness of CF during physical activity', 'social comparison as a facilitator or constrainer of physical activity' and 'strategies to remain physically active'. Participants were grouped as |
|--------|----|--------------------------------------------------------------|----------------------------|----------------------------------------|---------------------------------------------------------------------------------------------------------------------------------------------------------------------------------------------------------------------------------------------------|

1  
2  
3  
4  
5  
6  
7  
8  
9  
10  
11  
12  
13  
14  
15  
16  
17  
18  
19  
20  
21  
22  
23  
24  
25  
26  
27  
28  
29  
30  
31  
32  
33  
34  
35  
36  
37  
38  
39  
40  
41  
42  
43  
44  
45  
46

either high self-monitors who appeared more responsive to social and interpersonal cues and reported monitoring and regulating their behaviours (eight individuals were labelled as this) or low self-monitors. Low self-monitors did not display the same concern for social appropriateness, and their behaviours seemed less affected by those around them (four individuals were placed in this group).

---

|                 |     |                                                                                 |                                      |                                                                                 |                                                                                                                                                                                                                                                               |
|-----------------|-----|---------------------------------------------------------------------------------|--------------------------------------|---------------------------------------------------------------------------------|---------------------------------------------------------------------------------------------------------------------------------------------------------------------------------------------------------------------------------------------------------------|
| Swisher<br>2008 | USA | Ten participants (aged 13 to 17 years). All participants had a diagnosis of CF. | Semi structured telephone interviews | Verbatim and transcripts were coded using the line-by-line coding process; thus | All participants articulated understanding the importance of participating in physical activity for health benefits. Factors that served as facilitators to participation in physical activity included improving general or lung specific health, as well as |
|-----------------|-----|---------------------------------------------------------------------------------|--------------------------------------|---------------------------------------------------------------------------------|---------------------------------------------------------------------------------------------------------------------------------------------------------------------------------------------------------------------------------------------------------------|

---



1  
2  
3  
4 allowing the mental health. Barriers included general  
5  
6 researcher to discomfort, increased lung symptoms, and  
7  
8 deconstruct the disinterest.  
9  
10 data into discrete  
11  
12 pieces of  
13  
14 information that  
15  
16 could be compared  
17  
18 and grouped into  
19  
20 categories. In order  
21  
22 for a code to be  
23  
24 assigned to a  
25  
26 response, the code  
27  
28 had to be identified  
29  
30 by both principal  
31  
32 investigators and  
33  
34  
35  
36  
37  
38  
39  
40

---

the graduate  
student.

---

For peer review only

1  
2  
3  
4  
5  
6  
7  
8  
9  
10  
11  
12  
13  
14  
15  
16  
17  
18  
19  
20  
21  
22  
23  
24  
25  
26  
27  
28  
29  
30  
31  
32  
33  
34  
35  
36  
37  
38  
39  
40  
41  
42  
43  
44  
45  
46

Table 2. Quality assessment

| Article         | Clear Aim | Appropriate methodology | Appropriate research design | Appropriate recruitment strategy | Data collection addressed the research issues | Adequate consideration of reflexivity | Ethical issues | Sufficient rigor of data analysis | Clear statements of findings | Valuable research | Total |
|-----------------|-----------|-------------------------|-----------------------------|----------------------------------|-----------------------------------------------|---------------------------------------|----------------|-----------------------------------|------------------------------|-------------------|-------|
| Fereday         | Yes       | Yes                     | 3                           | 2                                | 3                                             | 1                                     | 3              | 3                                 | 3                            | 3                 | 21    |
| Happ            | Yes       | Yes                     | 3                           | 2                                | 3                                             | 1                                     | 3              | 3                                 | 3                            | 3                 | 21    |
| Moola<br>(2014) | Yes       | Yes                     | 3                           | 3                                | 3                                             | 2                                     | 3              | 3                                 | 3                            | 3                 | 23    |
| Moola<br>(2012) | Yes       | Yes                     | 3                           | 2                                | 3                                             | 2                                     | 3              | 3                                 | 3                            | 3                 | 22    |

1  
2  
3  
4  
5  
6  
7  
8  
9  
10  
11  
12  
13  
14  
15  
16  
17  
18  
19  
20  
21  
22  
23  
24  
25  
26  
27  
28  
29  
30  
31  
32  
33  
34  
35  
36  
37  
38  
39  
40  
41  
42  
43  
44  
45  
46

|         |     |     |   |   |   |   |   |   |   |   |    |
|---------|-----|-----|---|---|---|---|---|---|---|---|----|
| Moola   | Yes | Yes | 3 | 3 | 3 | 2 | 3 | 3 | 3 | 3 | 23 |
| (2011)  |     |     |   |   |   |   |   |   |   |   |    |
| Shelley | Yes | Yes | 3 | 3 | 3 | 1 | 3 | 3 | 2 | 3 | 21 |
| Street  | yes | yes | 3 | 3 | 3 | 3 | 3 | 3 | 3 | 3 | 24 |
| Swisher | Yes | Yes | 3 | 2 | 3 | 2 | 3 | 3 | 3 | 3 | 22 |

1  
2  
3  
4  
5  
6  
7  
8  
9  
10  
11  
12  
13  
14  
15  
16  
17  
18  
19  
20  
21  
22  
23  
24  
25  
26  
27  
28  
29  
30  
31  
32  
33  
34  
35  
36  
37  
38  
39  
40  
41  
42  
43  
44  
45  
46  
47

| Section/topic       | # | Checklist item                                                                                                                                                                                                                                                                                              | Reported on page # |
|---------------------|---|-------------------------------------------------------------------------------------------------------------------------------------------------------------------------------------------------------------------------------------------------------------------------------------------------------------|--------------------|
| <b>TITLE</b>        |   |                                                                                                                                                                                                                                                                                                             |                    |
| Title               | 1 | Identify the report as a systematic review, meta-analysis, or both.                                                                                                                                                                                                                                         |                    |
| <b>ABSTRACT</b>     |   |                                                                                                                                                                                                                                                                                                             |                    |
| Structured summary  | 2 | Provide a structured summary including, as applicable: background; objectives; data sources; study eligibility criteria, participants, and interventions; study appraisal and synthesis methods; results; limitations; conclusions and implications of key findings; systematic review registration number. |                    |
| <b>INTRODUCTION</b> |   |                                                                                                                                                                                                                                                                                                             |                    |
| Rationale           | 3 | Describe the rationale for the review in the context of what is already known.                                                                                                                                                                                                                              |                    |
| Objectives          | 4 | Provide an explicit statement of questions being addressed with reference to participants, interventions, comparisons, outcomes, and study design (PICOS).                                                                                                                                                  |                    |
| <b>METHODS</b>      |   |                                                                                                                                                                                                                                                                                                             |                    |
| Protocol and        | 5 | Indicate if a review protocol exists, if and where it can be accessed (e.g., Web address), and, if                                                                                                                                                                                                          |                    |

1  
2  
3  
4  
5  
6  
7  
8  
9  
10  
11  
12  
13  
14  
15  
16  
17  
18  
19  
20  
21  
22  
23  
24  
25  
26  
27  
28  
29  
30  
31  
32  
33  
34  
35  
36  
37  
38  
39  
40  
41  
42  
43  
44  
45  
46  
47

|                                    |    |                                                                                                                                                                                                        |  |
|------------------------------------|----|--------------------------------------------------------------------------------------------------------------------------------------------------------------------------------------------------------|--|
| registration                       |    | available, provide registration information including registration number.                                                                                                                             |  |
| Eligibility criteria               | 6  | Specify study characteristics (e.g., PICOS, length of follow-up) and report characteristics (e.g., years considered, language, publication status) used as criteria for eligibility, giving rationale. |  |
| Information sources                | 7  | Describe all information sources (e.g., databases with dates of coverage, contact with study authors to identify additional studies) in the search and date last searched.                             |  |
| Search                             | 8  | Present full electronic search strategy for at least one database, including any limits used, such that it could be repeated.                                                                          |  |
| Study selection                    | 9  | State the process for selecting studies (i.e., screening, eligibility, included in systematic review, and, if applicable, included in the meta-analysis).                                              |  |
| Data collection process            | 10 | Describe method of data extraction from reports (e.g., piloted forms, independently, in duplicate) and any processes for obtaining and confirming data from investigators.                             |  |
| Data items                         | 11 | List and define all variables for which data were sought (e.g., PICOS, funding sources) and any assumptions and simplifications made.                                                                  |  |
| Risk of bias in individual studies | 12 | Describe methods used for assessing risk of bias of individual studies (including specification of whether this was done at the study or outcome level), and how this information is to be used in     |  |

1  
2  
3  
4  
5  
6  
7  
8  
9  
10  
11  
12  
13  
14  
15  
16  
17  
18  
19  
20  
21  
22  
23  
24  
25  
26  
27  
28  
29  
30  
31  
32  
33  
34  
35  
36  
37  
38  
39  
40  
41  
42  
43  
44  
45  
46  
47

|                      |    |                                                                                                                                                                    |  |
|----------------------|----|--------------------------------------------------------------------------------------------------------------------------------------------------------------------|--|
|                      |    | any data synthesis.                                                                                                                                                |  |
| Summary measures     | 13 | State the principal summary measures (e.g., risk ratio, difference in means).                                                                                      |  |
| Synthesis of results | 14 | Describe the methods of handling data and combining results of studies, if done, including measures of consistency (e.g., I <sup>2</sup> ) for each meta-analysis. |  |

Page 1 of 2

| Section/topic               | #  | Checklist item                                                                                                                                   | Reported on page # |
|-----------------------------|----|--------------------------------------------------------------------------------------------------------------------------------------------------|--------------------|
| Risk of bias across studies | 15 | Specify any assessment of risk of bias that may affect the cumulative evidence (e.g., publication bias, selective reporting within studies).     |                    |
| Additional analyses         | 16 | Describe methods of additional analyses (e.g., sensitivity or subgroup analyses, meta-regression), if done, indicating which were pre-specified. |                    |
| <b>RESULTS</b>              |    |                                                                                                                                                  |                    |
| Study selection             | 17 | Give numbers of studies screened, assessed for eligibility, and included in the review, with                                                     |                    |

1  
2  
3  
4  
5  
6  
7  
8  
9  
10  
11  
12  
13  
14  
15  
16  
17  
18  
19  
20  
21  
22  
23  
24  
25  
26  
27  
28  
29  
30  
31  
32  
33  
34  
35  
36  
37  
38  
39  
40  
41  
42  
43  
44  
45  
46  
47

|                               |    |                                                                                                                                                                                                          |  |
|-------------------------------|----|----------------------------------------------------------------------------------------------------------------------------------------------------------------------------------------------------------|--|
|                               |    | reasons for exclusions at each stage, ideally with a flow diagram.                                                                                                                                       |  |
| Study characteristics         | 18 | For each study, present characteristics for which data were extracted (e.g., study size, PICOS, follow-up period) and provide the citations.                                                             |  |
| Risk of bias within studies   | 19 | Present data on risk of bias of each study and, if available, any outcome level assessment (see item 12).                                                                                                |  |
| Results of individual studies | 20 | For all outcomes considered (benefits or harms), present, for each study: (a) simple summary data for each intervention group (b) effect estimates and confidence intervals, ideally with a forest plot. |  |
| Synthesis of results          | 21 | Present results of each meta-analysis done, including confidence intervals and measures of consistency.                                                                                                  |  |
| Risk of bias across studies   | 22 | Present results of any assessment of risk of bias across studies (see Item 15).                                                                                                                          |  |
| Additional analysis           | 23 | Give results of additional analyses, if done (e.g., sensitivity or subgroup analyses, meta-regression [see Item 16]).                                                                                    |  |
| <b>DISCUSSION</b>             |    |                                                                                                                                                                                                          |  |



1  
2  
3  
4  
5  
6  
7  
8  
9  
10  
11  
12  
13  
14  
15  
16  
17  
18  
19  
20  
21  
22  
23  
24  
25  
26  
27  
28  
29  
30  
31  
32  
33  
34  
35  
36  
37  
38  
39  
40  
41  
42  
43  
44  
45  
46  
47

|                     |    |                                                                                                                                                                                      |  |
|---------------------|----|--------------------------------------------------------------------------------------------------------------------------------------------------------------------------------------|--|
| Summary of evidence | 24 | Summarize the main findings including the strength of evidence for each main outcome; consider their relevance to key groups (e.g., healthcare providers, users, and policy makers). |  |
| Limitations         | 25 | Discuss limitations at study and outcome level (e.g., risk of bias), and at review-level (e.g., incomplete retrieval of identified research, reporting bias).                        |  |
| Conclusions         | 26 | Provide a general interpretation of the results in the context of other evidence, and implications for future research.                                                              |  |
| <b>FUNDING</b>      |    |                                                                                                                                                                                      |  |
| Funding             | 27 | Describe sources of funding for the systematic review and other support (e.g., supply of data); role of funders for the systematic review.                                           |  |

## Search strategy

1. Exp Cystic Fibrosis/
2. Cystic fibrosis.[tiab]
3. CF.[tiab]
4. Or/1-3
5. Exp Physical Activity/
6. Exp Exercise /
7. Exp Sport /
8. Active\*
9. Fitness
10. Training
11. Exercise\*
12. Movement\*
13. Physical\*
14. Sport\*
15. Yoga
16. "Active minutes"
17. "Leisure time"
18. "Resistance training"
19. "Strength training"
20. Cardiovascular
21. Or/5-20

1  
2  
3  
4  
5  
6  
7  
8  
9  
10  
11  
12  
13  
14  
15  
16  
17  
18  
19  
20  
21  
22  
23  
24  
25  
26  
27  
28  
29  
30  
31  
32  
33  
34  
35  
36  
37  
38  
39  
40  
41  
42  
43  
44  
45  
46  
47  
48  
49  
50  
51  
52  
53  
54  
55  
56  
57  
58  
59  
60

ASSIA on ProQuest

CINAHL on EBSCOHost

EMBASE on OVIDSP,

MEDLINE on OVIDSP

MEDLINE-in-process on OVIDSP

PsycINFO on OVIDSP

For peer review only

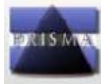

# PRISMA 2009 Checklist

| Section/topic                      | #  | Checklist item                                                                                                                                                                                                                                                                                              | Reported on page # |
|------------------------------------|----|-------------------------------------------------------------------------------------------------------------------------------------------------------------------------------------------------------------------------------------------------------------------------------------------------------------|--------------------|
| <b>TITLE</b>                       |    |                                                                                                                                                                                                                                                                                                             |                    |
| Title                              | 1  | Identify the report as a systematic review, meta-analysis, or both.                                                                                                                                                                                                                                         | 1                  |
| <b>ABSTRACT</b>                    |    |                                                                                                                                                                                                                                                                                                             |                    |
| Structured summary                 | 2  | Provide a structured summary including, as applicable: background; objectives; data sources; study eligibility criteria, participants, and interventions; study appraisal and synthesis methods; results; limitations; conclusions and implications of key findings; systematic review registration number. | 3                  |
| <b>INTRODUCTION</b>                |    |                                                                                                                                                                                                                                                                                                             |                    |
| Rationale                          | 3  | Describe the rationale for the review in the context of what is already known.                                                                                                                                                                                                                              | 6                  |
| Objectives                         | 4  | Provide an explicit statement of questions being addressed with reference to participants, interventions, comparisons, outcomes, and study design (PICOS).                                                                                                                                                  | 7                  |
| <b>METHODS</b>                     |    |                                                                                                                                                                                                                                                                                                             |                    |
| Protocol and registration          | 5  | Indicate if a review protocol exists, if and where it can be accessed (e.g., Web address), and, if available, provide registration information including registration number.                                                                                                                               |                    |
| Eligibility criteria               | 6  | Specify study characteristics (e.g., PICOS, length of follow-up) and report characteristics (e.g., years considered, language, publication status) used as criteria for eligibility, giving rationale.                                                                                                      | 8                  |
| Information sources                | 7  | Describe all information sources (e.g., databases with dates of coverage, contact with study authors to identify additional studies) in the search and date last searched.                                                                                                                                  | 8                  |
| Search                             | 8  | Present full electronic search strategy for at least one database, including any limits used, such that it could be repeated.                                                                                                                                                                               | Appendix           |
| Study selection                    | 9  | State the process for selecting studies (i.e., screening, eligibility, included in systematic review, and, if applicable, included in the meta-analysis).                                                                                                                                                   | 8/9                |
| Data collection process            | 10 | Describe method of data extraction from reports (e.g., piloted forms, independently, in duplicate) and any processes for obtaining and confirming data from investigators.                                                                                                                                  | 8/9                |
| Data items                         | 11 | List and define all variables for which data were sought (e.g., PICOS, funding sources) and any assumptions and simplifications made.                                                                                                                                                                       | 8/9                |
| Risk of bias in individual studies | 12 | Describe methods used for assessing risk of bias of individual studies (including specification of whether this was done at the study or outcome level), and how this information is to be used in any data synthesis.                                                                                      | 10                 |
| Summary measures                   | 13 | State the principal summary measures (e.g., risk ratio, difference in means).                                                                                                                                                                                                                               | 10                 |
| Synthesis of results               | 14 | Describe the methods of handling data and combining results of studies, if done, including measures of consistency (e.g., $I^2$ ) for each meta-analysis.                                                                                                                                                   | 10                 |

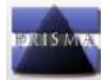

# PRISMA 2009 Checklist

| Section/topic                 | #  | Checklist item                                                                                                                                                                                           | Reported on page # |
|-------------------------------|----|----------------------------------------------------------------------------------------------------------------------------------------------------------------------------------------------------------|--------------------|
| Risk of bias across studies   | 15 | Specify any assessment of risk of bias that may affect the cumulative evidence (e.g., publication bias, selective reporting within studies).                                                             | 11 and Table 2     |
| Additional analyses           | 16 | Describe methods of additional analyses (e.g., sensitivity or subgroup analyses, meta-regression), if done, indicating which were pre-specified.                                                         | NA                 |
| <b>RESULTS</b>                |    |                                                                                                                                                                                                          |                    |
| Study selection               | 17 | Give numbers of studies screened, assessed for eligibility, and included in the review, with reasons for exclusions at each stage, ideally with a flow diagram.                                          | Figure 1           |
| Study characteristics         | 18 | For each study, present characteristics for which data were extracted (e.g., study size, PICOS, follow-up period) and provide the citations.                                                             | Table 1            |
| Risk of bias within studies   | 19 | Present data on risk of bias of each study and, if available, any outcome level assessment (see item 12).                                                                                                | Table 2            |
| Results of individual studies | 20 | For all outcomes considered (benefits or harms), present, for each study: (a) simple summary data for each intervention group (b) effect estimates and confidence intervals, ideally with a forest plot. | NA                 |
| Synthesis of results          | 21 | Present results of each meta-analysis done, including confidence intervals and measures of consistency.                                                                                                  | NA                 |
| Risk of bias across studies   | 22 | Present results of any assessment of risk of bias across studies (see Item 15).                                                                                                                          | 11                 |
| Additional analysis           | 23 | Give results of additional analyses, if done (e.g., sensitivity or subgroup analyses, meta-regression [see Item 16]).                                                                                    | NA                 |
| <b>DISCUSSION</b>             |    |                                                                                                                                                                                                          |                    |
| Summary of evidence           | 24 | Summarize the main findings including the strength of evidence for each main outcome; consider their relevance to key groups (e.g., healthcare providers, users, and policy makers).                     | 19/20              |
| Limitations                   | 25 | Discuss limitations at study and outcome level (e.g., risk of bias), and at review-level (e.g., incomplete retrieval of identified research, reporting bias).                                            | 21                 |
| Conclusions                   | 26 | Provide a general interpretation of the results in the context of other evidence, and implications for future research.                                                                                  | 22                 |
| <b>FUNDING</b>                |    |                                                                                                                                                                                                          |                    |
| Funding                       | 27 | Describe sources of funding for the systematic review and other support (e.g., supply of data); role of funders for the systematic review.                                                               | 5                  |

From: Moher D, Liberati A, Tetzlaff J, Altman DG, The PRISMA Group (2009). Preferred Reporting Items for Systematic Reviews and Meta-Analyses: The PRISMA Statement. PLoS Med 6(7): e1000097. doi:10.1371/journal.pmed1000097

For more information, visit: [www.prisma-statement.org](http://www.prisma-statement.org).

# BMJ Open

## Barriers and facilitators to physical activity among children, adolescents, and young adults with cystic fibrosis: A systematic review and thematic synthesis of qualitative of research

|                                 |                                                                                                                                                                                                                                                                                                                                                                                                   |
|---------------------------------|---------------------------------------------------------------------------------------------------------------------------------------------------------------------------------------------------------------------------------------------------------------------------------------------------------------------------------------------------------------------------------------------------|
| Journal:                        | <i>BMJ Open</i>                                                                                                                                                                                                                                                                                                                                                                                   |
| Manuscript ID                   | bmjopen-2019-035261.R1                                                                                                                                                                                                                                                                                                                                                                            |
| Article Type:                   | Original research                                                                                                                                                                                                                                                                                                                                                                                 |
| Date Submitted by the Author:   | 08-Jan-2020                                                                                                                                                                                                                                                                                                                                                                                       |
| Complete List of Authors:       | Denford, Sarah; University of Exeter, Children's Health & Exercise Research Centre, Sport and Health Sciences<br>van Beurden, Samantha; University of Exeter, Children's Health & Exercise Research Centre, Sport and Health Sciences<br>O'Halloran, Paul; La Trobe University,<br>Williams, Craig; University of Exeter, Children's Health & Exercise Research Centre, Sport and Health Sciences |
| <b>Primary Subject Heading</b>: | Respiratory medicine                                                                                                                                                                                                                                                                                                                                                                              |
| Secondary Subject Heading:      | Qualitative research, Paediatrics, Respiratory medicine                                                                                                                                                                                                                                                                                                                                           |
| Keywords:                       | QUALITATIVE RESEARCH, RESPIRATORY MEDICINE (see Thoracic Medicine), SPORTS MEDICINE, Cystic fibrosis < THORACIC MEDICINE, Paediatric thoracic medicine < PAEDIATRICS                                                                                                                                                                                                                              |
|                                 |                                                                                                                                                                                                                                                                                                                                                                                                   |

SCHOLARONE™  
Manuscripts

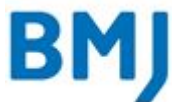

I, the Submitting Author has the right to grant and does grant on behalf of all authors of the Work (as defined in the below author licence), an exclusive licence and/or a non-exclusive licence for contributions from authors who are: i) UK Crown employees; ii) where BMJ has agreed a CC-BY licence shall apply, and/or iii) in accordance with the terms applicable for US Federal Government officers or employees acting as part of their official duties; on a worldwide, perpetual, irrevocable, royalty-free basis to BMJ Publishing Group Ltd ("BMJ") its licensees and where the relevant Journal is co-owned by BMJ to the co-owners of the Journal, to publish the Work in this journal and any other BMJ products and to exploit all rights, as set out in our [licence](#).

The Submitting Author accepts and understands that any supply made under these terms is made by BMJ to the Submitting Author unless you are acting as an employee on behalf of your employer or a postgraduate student of an affiliated institution which is paying any applicable article publishing charge ("APC") for Open Access articles. Where the Submitting Author wishes to make the Work available on an Open Access basis (and intends to pay the relevant APC), the terms of reuse of such Open Access shall be governed by a Creative Commons licence – details of these licences and which [Creative Commons](#) licence will apply to this Work are set out in our licence referred to above.

Other than as permitted in any relevant BMJ Author's Self Archiving Policies, I confirm this Work has not been accepted for publication elsewhere, is not being considered for publication elsewhere and does not duplicate material already published. I confirm all authors consent to publication of this Work and authorise the granting of this licence.

1  
2  
3 Barriers and facilitators to physical activity among children,  
4  
5  
6 adolescents, and young adults with cystic fibrosis: A systematic review  
7  
8  
9 and thematic synthesis of qualitative of research  
10  
11  
12  
13  
14  
15

16 Denford, S., van Beurden, SB., O'Halloran, P., Williams, CA.  
17  
18  
19  
20  
21

22 **Corresponding author:**  
23  
24

25 Sarah Denford,  
26  
27

28 Children's Health and Exercise Research Centre,  
29  
30

31 Sport and Health Sciences, University of Exeter,  
32  
33

34 St. Luke's Campus,  
35  
36

37 Heavitree Road,  
38  
39

40 Exeter, EX1 2LU, UK.  
41  
42

43 Email: [S.Denford@exeter.ac.uk](mailto:S.Denford@exeter.ac.uk)  
44  
45  
46  
47  
48

49 Samantha B van Beurden,  
50  
51

52 Children's Health and Exercise Research Centre,  
53  
54

55 Sport and Health Sciences,  
56  
57

58 University of Exeter,  
59  
60



1  
2  
3 St. Luke's Campus,  
4

5  
6 Heavitree Road,  
7

8  
9 Exeter, EX1 2LU, UK.  
10

11  
12 Email: [S.Van-Beurden@exeter.ac.uk](mailto:S.Van-Beurden@exeter.ac.uk)  
13  
14

15  
16  
17 Paul O'Halloran,  
18

19  
20 School of Psychology and Public Health,  
21

22  
23 La Trobe University,  
24

25  
26 Bundoora Victoria 3086  
27

28  
29 Email: [P.OHalloran@latrobe.edu.au](mailto:P.OHalloran@latrobe.edu.au)  
30  
31

32  
33  
34  
35 Craig A Williams,  
36

37  
38 Children's Health and Exercise Research Centre,  
39

40  
41 Sport and Health Sciences,  
42

43  
44 University of Exeter, St. Luke's Campus,  
45

46  
47 Heavitree Road,  
48

49  
50 Exeter, EX1 2LU, UK.  
51

52  
53 Email: [C.A.Williams@Exeter.ac.uk](mailto:C.A.Williams@Exeter.ac.uk)  
54  
55  
56  
57  
58  
59  
60

1  
2  
3  
4  
5  
6 **Word count: 5886**  
7  
8

9 **Key words:** Respiratory, Exercise, Self-determination theory, Intrinsic motivation, Family.  
10  
11  
12  
13  
14  
15  
16  
17  
18  
19  
20  
21  
22  
23  
24  
25  
26  
27  
28  
29  
30  
31  
32  
33  
34  
35  
36  
37  
38  
39  
40  
41  
42  
43  
44  
45  
46  
47  
48  
49  
50  
51  
52  
53  
54  
55  
56  
57  
58  
59  
60

For peer review only

## Abstract

Objectives: Physical activity is widely recommended in the treatment and management of cystic fibrosis (CF). Despite the numerous physical and psychological benefits, many young people with CF are not achieving the recommended levels of physical activity. The aim of this systematic review was to identify and synthesise available qualitative investigations exploring the motives for, barriers to and facilitators of physical activity among young people with CF.

Methods: The following six electronic databases were systematically searched: ASSIA, CINAHL, EMBASE, MEDLINE, MEDLINE-in-process, PsycINFO up to August 2019. Keywords were used to identify qualitative research that explored engagement in physical activity among young people with CF. Titles and abstracts were screened by two independent reviewers, and potentially relevant articles were retrieved in full. Articles were eligible for inclusion if they employed any qualitative method and recruited participants under the age of 24 years with CF. Risk of bias of included studies were assessed via the Critical Appraisal Skills Program. Results were synthesised using a thematic approach.

Results: Seven studies met our inclusion criteria and were included in the review. Overall, studies were of moderate to high quality. Thematic synthesis identified nine main themes that encompass motives for, barriers to and facilitators of physical activity among young people with CF. These were 1) perceptions of physical activity, 2) value attributed to physical activity, 3) social influences, 4) competing priorities, 5) fluctuating health, 6) normality, 7) control beliefs, 8) coping strategies, and 9) availability of facilities. Previous reviews have been unable to identify intervention characteristics that influence physical activity behaviour.

1  
2  
3 Conclusions: This review provides detailed information on the physical (biological – clinical),  
4  
5 psychological, social, and environmental influences on physical activity behaviour, thus  
6  
7 providing numerous targets for future interventions. This in turn could facilitate promotion  
8  
9 of physical activity among young people with CF.  
10  
11  
12

### 13 **Article summary**

#### 14 **Strengths and limitations of this study**

- 15  
16  
17 • This is the first synthesis of qualitative work that has explored barriers and  
18  
19 facilitators to physical activity among young people with CF.  
20  
21
- 22  
23 • This study can be used to inform the development of intervention targeting physical  
24  
25 activity among young people with CF.  
26  
27
- 28  
29 • We were not able to include data from 16 potentially relevant abstracts as no full  
30  
31 text were available.  
32  
33
- 34  
35 • Three of the studies included in the review were authored by one research team,  
36  
37 this may reflect a smaller distribution of participants, potentially reducing the  
38  
39 transferability of findings.  
40  
41  
42  
43  
44  
45  
46  
47  
48  
49  
50  
51  
52  
53  
54  
55  
56  
57  
58  
59  
60

**Declarations of conflicting interests**

The authors declare that there is no conflict of interest.

**Ethics approval and consent to participate**

Not applicable

**Consent for publication**

Not applicable

**Availability of data and material**

All data relevant to the study are included in the article or uploaded as supplementary information.

**Funding**

The following work was supported by the Cystic Fibrosis Trust Strategic Research Centre: grant number 008. The funders had no involvement in the research.

**Author contributions**

This study was designed by SD with considerable input from SvB, CW and PO. Studies were identified by SD with input from colleagues with expertise in systematic reviewing. Data were extracted and analysed by SD and SvB with input from PO and CW. The manuscript was prepared by SD with considerable input from SvB, CW and PO. All authors approved the final manuscript prior to publication.

## Background

Cystic fibrosis (CF) is a progressive, genetic condition affecting more than 10,400 people in the United Kingdom, and more than 70,000 worldwide [1]. Mutations in the cystic fibrosis transmembrane (CFTR) affect the regulation of salt and water movement across cell membranes, resulting in abnormally thick mucus in the lungs and digestive system [1]. This leads to bronchiectasis, inflammation, recurrent infections and eventually respiratory failure [1]. There is no cure for CF, but advances in treatment mean that people with CF have a greater life expectancy than previous generations [2]. However, treatment is demanding; comprising a complex regime of pharmacological treatments, physiotherapy and airway clearance, high calorie diets and physical activity [3].

Physical activity, inclusive of sport, exercise, and recreational activities are widely recommended in the management of CF [4] due to the beneficial impact on aerobic capacity and lung function [5, 6], as well as improvements in cardiovascular endurance [7], muscular strength [8], and mucus clearance [9]. Physical activity also has a positive impact on health-related quality of life [6], fatigue [10], and psychological wellbeing [11]. The role of physical activity in the management of CF is viewed favourably by both healthcare professionals [12, 13] and people with CF [14, 15]. Despite this, like their healthy peers, many children with CF are failing to achieve the national recommended 60 minutes of daily moderate to vigorous activity [16, 17], with levels reducing further throughout adolescence [18]. Not only does this have implications for physical health [19], it also has a detrimental impact on psychological health [6], as well as reducing opportunities for social interaction [6].

The impact of physical activity on the physical and psychological health of individuals with cystic fibrosis has been well established. However, in contrast to the literature regarding the

1  
2  
3 benefits of physical activity, there is a paucity of literature regarding how best to support  
4  
5 young people with CF to be more physically active. One quantitative review, of interventions  
6  
7 for promoting physical activity among individuals with CF [20], found little evidence to  
8  
9 support the effectiveness of any approach to promote physical activity. However, in order to  
10  
11 successfully change behaviour, it is necessary to identify and target determinants of the  
12  
13 behaviour in question [21]. However, the quantitative review did not consider the  
14  
15 modifiable determinants of physical activity and is therefore not able to explain what these  
16  
17 approaches were targeting (i.e., mechanisms of action) and why they may have failed to  
18  
19 promote physical activity.  
20  
21  
22  
23  
24

25 A large body of literature has explored deterrents, barriers and facilitators to physical  
26  
27 activity among young people without chronic conditions [22]. Individual level (e.g.,  
28  
29 enjoyment, motivation), interpersonal (social relationships) and environmental factors (e.g.,  
30  
31 access to green space) have been highlighted as important determinants of physical activity  
32  
33 [22, 23, 24]. However, young people with CF have a unique set of circumstances, for  
34  
35 example, fluctuating health, which is likely to influence participation in physical activity. It is  
36  
37 therefore necessary to explore barriers and facilitators to physical activity among this  
38  
39 population. There is widespread agreement among intervention developers that eliciting  
40  
41 and addressing the needs and perspectives of the target audience is a critical part of  
42  
43 intervention development [25]. It is impossible for research teams to predict the needs and  
44  
45 preferences of the target audience, and so it is crucial that we elicit the views of  
46  
47 intervention recipients [26]. This will facilitate the identification of potentially modifiable  
48  
49 psychological, social, environmental and behavioural determinants of physical activity for  
50  
51 young people with CF and will inform the selection of approaches to effectively support  
52  
53 changes in physical activity for this population [27]. As qualitative methods provide in-  
54  
55  
56  
57  
58  
59  
60

1  
2  
3 depth, rich and detailed information about a topic as experienced by target populations  
4  
5 they are well placed to explore this topic. Whilst research relating to motives, barriers and  
6  
7 facilitators of physical activity among young people with CF has been conducted [28-30], as  
8  
9 yet, no review has comprehensively and systematically synthesised this literature.  
10  
11

12  
13 The socio ecological model provides the overarching framework for this review [31]. The  
14  
15 model highlights the multiple layers of influence on the health of the population. The model  
16  
17 recognises that, in addition to personal lifestyle, the physical and social environment, and  
18  
19 wider socio-economic conditions affect population health. As interventions may operate at  
20  
21 any of these levels, the current work aims to explore the barriers and facilitators to physical  
22  
23 activity that operate at these multiple levels. Utilising this model, we explore barriers and  
24  
25 facilitators to physical activity among young people with CF.  
26  
27  
28  
29

## 30 31 **Aims**

32  
33 This systematic review aimed to identify and synthesise the qualitative literature on the  
34  
35 motives for, barriers to, and facilitators of physical activity among young people with CF.  
36  
37 Specifically, we were interested in understanding: 1) What motivates young people with CF  
38  
39 to be active; 2) What are the barriers to being physically active among young people with  
40  
41 CF; 3) What facilitates physical active among young people with CF.  
42  
43  
44  
45

## 46 47 **Methods**

48  
49 The review was conducted and reported in accordance with the Preferred Reporting Items  
50  
51 for Systematic Reviews and Meta-analyses (PRISMA) statement (Supplement 1) [32].  
52  
53  
54  
55  
56  
57  
58  
59  
60



## Search strategy

The following six electronic databases were searched: ASSIA, CINAHL, EMBASE, MEDLINE, MEDLINE-in-process, PsycINFO up to August 2019. Key word search terms included: Cystic Fibrosis; Physical activity; Exercise; Sport; Recreation (See full Search Strategy in Supplement 2). Search terms were adapted for each database. Reference lists of existing reviews were also searched. To identify any unpublished or ongoing work, key authors and experts in the field were contacted.

## Study selection

All titles and abstracts of identified records were reviewed by the lead author. A second reviewer independently reviewed 10% of records. As there was 100% agreement between the two reviewers, it was decided that it was not necessary for all records to be reviewed by a second reviewer. Potentially relevant articles were retrieved in full and all (100%) were assessed independently by both reviewers against the inclusion criteria and quality assessment (as below).

## Inclusion criteria

### *Types of studies to be included*

Any study using qualitative methods to identify motivators, barriers or facilitators to physical activity among young people with CF. We did not limit the search by date or location, but inclusion was limited to studies written in English.

### ***Participants / population***

Our population of interest were children and young people with CF under the age of 24 years. Studies including adults were also eligible for inclusion if the majority of participants fell between the relevant age bracket.

Studies including participants with multiple conditions (e.g., those studying people with chronic disease) were included as long as data provided by individuals with CF were clearly indicated.

### ***Intervention / exposure***

Any study describing motives for or barriers or facilitators to physical activity among young people with CF.

### **Exclusion criteria**

We excluded studies that: 1) did not include individuals with CF; 2) promote physical activity or exercise without consideration of barriers or facilitators; 3) are not reported in enough detail to identify barriers or facilitators to physical activity; 4) do not primarily target young people (under the age of 24); 5) are not published in English; 6) do not use qualitative methods.

### **Primary outcome**

1. Motives for physical activity participation among young people with CF.
2. Barriers to physical activity participation among young people with CF.
3. Facilitators of physical activity participation among young people with CF.

## Data extraction

Data were extracted independently by the first and second author using a data extraction template developed for this purpose. Any disagreements were resolved via discussion.

Data were extracted on:

1. Author and year and location of publication
2. Study design
3. Sample size and characteristics
4. Data collection methods
5. Method of analysis
6. Barriers and facilitators identified or targeted
7. Overall conclusions

## Risk of bias

Risk of bias were assessed independently by the first and second author using the Critical Appraisal Skills Program (CASP) tool for qualitative and observational studies [33]. Kappa statistics indicated excellent levels of agreement (>0.8). Any disagreements were resolved via discussion. The CASP is a 10-item checklist comprising questions relating to the research design, data collection and analysis, reflexivity, ethics, implications of the research. We adopted a three-point rating system as used by a number of authors [34, 35], in which a rating point from 1-3 is given to each article for each of the CASP's questions. Studies receive a score of 1 for issues that are not mentioned or poorly justified; a score of 2 for little elaboration of an issue; and a score of 3 for issues that are well justified. This results in a quality score of between 8 and 24. Those scoring less than 15 were categorised as weak. Those scoring between 16 and 23 were considered moderate, and those scoring 24 points

1  
2  
3 were considered strong. In this review, the CASP was used to describe the quality of the  
4  
5 studies for contextual purposes. No exclusions were made on the basis on CASP scores.  
6  
7

### 8 **Strategy for data synthesis**

9  
10 Data from qualitative studies were synthesised using a thematic method [36] in which  
11  
12 common themes from each study are highlighted and discussed. First, the results and  
13  
14 discussion sections of the manuscripts were read by two reviewers, and relevant data were  
15  
16 extracted and entered into Nvivo for analysis. Thematic analysis followed three stages as  
17  
18 recommended by Thomas and Harden [37]. Focusing on author's interpretations of the  
19  
20 data, the first stage involved the creation of initial codes to describe or summarise relevant  
21  
22 text. In the second and third stage, codes were organised into descriptive themes, and  
23  
24 finally into analytical themes (stage 3). We employed multiple measures to maximise  
25  
26 trustworthiness within this study. This included clear exposure of methods of data collection  
27  
28 and analysis, maintaining an audit trail of the analysis process, attention to negative cases,  
29  
30 and engaging in multiple discussions with the research team to challenge themes as they  
31  
32 develop.  
33  
34  
35  
36  
37  
38  
39  
40

### 41 **Patient and public involvement**

42  
43 A patient and public involvement group was established to inform the development and  
44  
45 direction of our research. The group met regularly (via skype) and consisted of young people  
46  
47 with cystic fibrosis, physiotherapists, technicians, and paediatricians. In the first instance,  
48  
49 the group were asked to suggest research topics and questions they would like to be  
50  
51 answered. Later, the group met to support the development of the protocol. Finally, the  
52  
53 group were very much involved in disseminating the results of the review though the  
54  
55 development and production of short animations.  
56  
57  
58  
59  
60

## Results

### Study selection

The search results (Fig. 1) identified 10,673 records, of which 2631 were duplicates. After application of the exclusion criteria, seven studies were included in the thematic analysis.

### Overview of studies

The included studies were published between 2008 and 2018. One study was conducted in Australia [38], three in Canada [39-41], two in the United States of America [42, 43], and one in the United Kingdom [44]. All studies reported the use of semi-structured interviews. One study used a multifaceted approach to data collection; also utilizing focus groups, mapping, photo-elicitation and traffic light posters [38]. One study reported the use of telephone interviews [43]. Methods of analysis included interpretive phenomenology [38, 44], thematic analysis [40, 42, 43], grounded theory [41] and case study analysis [39]. The rationale for the conduct of the work was to increase understanding of physical activity among children with CF [38], promote children's participation in research [38] and to inform the development of interventions to promote physical activity [40-43].

Participants were between the ages of 4 and 18 years; although only one study included participants that were under the age of 8 years [38]. All had a confirmed diagnosis of CF, although two studies included participants with other chronic conditions; including coronary heart disease [40] asthma [38] and type one diabetes [38]. Three studies also included parents of young people with CF alongside the perspective of the young person with CF [38, 40, 42], and one study included the views of healthcare professionals [44]. Three of the included studies were written by the same lead author [40, 41]. See Table 1 for an overview of included studies.

## Risk of bias

An overview of the quality of the included studies is presented in Table 2. All seven studies were considered to be of moderate quality.

## Thematic synthesis

Thematic synthesis identified nine main themes that encompass motives for physical activity, barriers to, and facilitators of physical activity at the level of the individual, the social environment, and the built and natural environment as outlined in the socio-ecological model. These main themes were: 1) perceptions of physical activity, 2) value for physical activity, 3) social influences, 4) competing priorities, 5) fluctuating health, 6) normality, 7) control beliefs, 8) coping strategies, and 9) availability of facilities. The data provided below are quotes from the participants who had taken part in the primary studies and were reported by the authors of the included studies to illustrate their findings.

### *Perceptions of Physical activity*

Within the seven papers, positive and negative perceptions of physical activity were considered to be influential in engagement with physical activity [39, 42, 43, 44]. Positive perceptions included enjoyment, mastery, and autonomy; and appeared to be highly influenced by previous experiences of physical activity, the health of the individual, and the social environment in which physical activity was performed. A sense of “fun” and “enjoyment” appeared to be important for sustained physical activity [41, 43]; as evidenced by one participant in the study by Swisher et al who states; *“I want to exercise because I like doing the activities... they are fun... I feel good after”* (p110). Likewise, perceptions of “energy” versus “work” were influential; with individuals who report feeling “energetic” and “empowered” after activity more likely to report continued physical activity [43].

1  
2  
3 Participants who had positive perceptions of physical activity also often reported mastery  
4 experiences; mentioning the building of a sense of competence and achievement [41]. One  
5  
6 participant in the study by Moola et al [41] describes how her preferred activity (dance) *“is*  
7  
8 *really exciting. There is a lot of anticipation leading up to it. I like working hard to achieve*  
9  
10 *things”* (P52). In contrast, negative perceptions of physical activity appeared to decrease  
11  
12 motivation for physical activity. Unpleasant sensations such as discomfort, muscle soreness,  
13  
14 fatigue, joint pain and breathlessness [42, 44], and a lack of enjoyment or boredom [43]  
15  
16 were reported. As an example, one participant in the study by Shelley et al [44] dislikes the  
17  
18 way exercise *“gives you the pains the next day. Like you’re dragging your legs up the stairs*  
19  
20 *the next day”* (P340). Feelings of self-consciousness resulted in young people feeling  
21  
22 exposed and vulnerable [39], despondent [40], and anxious to avoid physical activity [40].  
23  
24 Negative perceptions of physical activity appeared to be exacerbated by CF and symptoms  
25  
26 of CF (e.g., tiredness, breathlessness) [41, 44]; as highlighted by a quote from a participant  
27  
28 in Moola et al’s [41] study: *“I know enough times from being sick and trying to run on the*  
29  
30 *treadmill... so then I say, ‘if I am going to be tired, then why do it?’”* (P54).  
31  
32  
33  
34  
35  
36  
37  
38  
39

### 40 ***Value attributed to physical activity***

41  
42  
43 Included studies presented individuals as placing high or low value on physical activity.  
44  
45 Physical activity was considered to be important for improving general health for both  
46  
47 young people with CF [42, 43] and their families [40]. It was also viewed as critical for the  
48  
49 management of CF; both in terms of preventing or delaying deterioration and in managing  
50  
51 symptoms [40, 42, 43, 44]. As an example, one participant in Swisher’s [43] study described  
52  
53 how physical activity *“helps my lungs and stuff...It helps me breathe better...it keeps me*  
54  
55 *active so I could always run around”* (P110). However, this only appeared to be the case for  
56  
57  
58  
59  
60

1  
2  
3 those who enjoyed physical activity; and found they felt better after activity. For those who  
4  
5 did not enjoy PA, the unpleasantness associated with physical activity appeared to outweigh  
6  
7 any positive associations.  
8  
9

10  
11 The role of physical activity in psychological health was not mentioned as frequently as its  
12  
13 contribution to physical health; only being noted as important in one study [43]. Despite  
14  
15 being aware of the benefits of physical activity, some young people with CF placed no value  
16  
17 on physical activity – particularly if it was perceived to be unpleasant [41]. Indeed, health  
18  
19 improvement and CF management were not sufficiently motivational for those who were  
20  
21 not active; with one participant in the study by Moola et al [41] acknowledging that:  
22  
23

24  
25 *“[physical activity] should be higher on the priority list.... But because I know that it is hard, I*  
26  
27 *do not want to make myself work hard” (P54).*  
28  
29

### 30 31 ***Social influences*** 32

33  
34 All studies included in the review highlighted the role of the parents /care providers in  
35  
36 influencing physical activity behaviour. Parents were described as knowledgeable about the  
37  
38 role played by physical activity in the health of their child [38, 41], and appeared to play a  
39  
40 key role in acting as strong physical activity role models [40-42]. This included providing  
41  
42 children with the skills they need to be active [42] providing tangible support [38, 44],  
43  
44 planning, structuring activities and overcoming barriers [38, 41, 42] providing opportunities  
45  
46 for physical activity, and providing encouragement and motivation [41, 42, 44]. For example,  
47  
48 one parent in Fereday’s study [38] describing a willingness to drive her daughter to a dance  
49  
50 class (an hour round trip) five nights a week because *“we are relieved she loves dancing so*  
51  
52 *much because it is something she can do all year round, it's indoors, dry and warm” (P6).*  
53  
54  
55  
56  
57  
58  
59  
60



1  
2  
3 Parental support could be detrimental to physical activity behaviour if parents were  
4  
5 sedentary [40-42] or overbearing [44]. This is demonstrated by a quote from a participant in  
6  
7 Shelley's study [44] in which the participant states "*I did a mile on the treadmill the other*  
8  
9 *day, and Dad was like, 'No, you're going to do another one... (I feel like) I'm going to slap*  
10  
11 *him. Push him off his bike. You do another mile'" (P340). Parents themselves were aware of*  
12  
13 the impact of their physical activity on their child's physical activity behaviour; although  
14  
15 often struggled to motivate themselves and their child to be active, with one parent  
16  
17 participant in Happ's study [42] reporting that "*It is hard for me to make him exercise just*  
18  
19 *because I don't, I guess" (P309).*

20  
21 The role of social comparison was strongly noted by three of the seven studies [ 40, 43, 44].  
22  
23 Interestingly, social comparison could be motivational; with young people reporting  
24  
25 increased efforts to ensure that they were able to "keep up" with their peers [44]. For  
26  
27 example, one participant in Shelley's study [44] describes how "*When I can do what my*  
28  
29 *mates are doing I just feel better, because I know that it doesn't show that it's affecting me,*  
30  
31 *and I can keep up with my mates and just do all the exercise" (P340). In contrast, not being*  
32  
33 able to keep up with peers [40] and / or needing to take regular breaks [40] could lead to  
34  
35 embarrassment [43], anger and frustration [44]; making adolescents 'stand out' – something  
36  
37 they are appear motivated to avoid [43]. This was exacerbated by negative comments or  
38  
39 treatment by others; including teachers and coaches [38, 40]. Indeed, one participant in  
40  
41 Moola's study [41] describes feeling that CF precludes him from sport:  
42  
43 "*I feel small, I feel skinny. I do not feel like I fit in with other kids... and they think that I am*  
44  
45 *bad and that I have some disease . . . they talk rudely about me to themselves . . . if it (sports*  
46  
47 *programs) is for kids that are not sick—there is no point in going. It is all healthy kids, and*  
48  
49 *they are active, and it is a place for them" (P55).*

1  
2  
3 Four of the seven studies reported a beneficial effect of positive friendship groups on  
4 physical activity behaviour [38, 40, 41, 44]; either through providing support [38, 39], or  
5 making activity more enjoyable [41, 44]. One study reported how participation in physical  
6 activity could even extend the young persons' social group [38]; with participants describing  
7 how they had made friends through various activities. Shelley et al [44] present a quote  
8 from a young person with CF who uses humour when her CF prevents her from being as  
9 active as her friends:

10  
11  
12  
13  
14  
15  
16  
17  
18  
19  
20  
21 *"Like one of us wins a race or wins a game or something, I can go, 'Oh yes, well, I've got CF',*  
22 *and then it's like pulling a CF card...I just find it funny, because they're like, 'aaaaaah! She's*  
23 *done it again'...we have a laugh about it...."* (P370).

### 24 25 26 27 28 ***Competing priorities***

29  
30  
31 Of the seven included studies, a lack of time for physical activity due to competing priorities  
32 was mentioned in three [40-42]. Busy schedules were reported as a barrier, particularly  
33 when taking into account an already burdensome treatment regime [42]. Participants in the  
34 study by Moola et al [41] described how physiotherapy "robbed them of time" that would  
35 otherwise have been used for physical activity; *"I know that I need to do physical activity,*  
36 *but it is just sometimes hard when things interfere, like medicine or PEP"* (P556).

37  
38  
39 For others, limited time prohibited physical activity because they would rather spend the  
40 time doing something meaningful and enjoyable for them (such as seeing friends) [41]. As a  
41 lack of time due to treatment, one study described how participants alluded to a lack of  
42 time in a symbolic sense [41]. Within this study, participants presented concerns that "time  
43 was running out" due to a shortened lifespan. This increased the pressure to achieve  
44  
45  
46  
47  
48  
49  
50  
51  
52  
53  
54  
55  
56  
57  
58  
59  
60

1  
2  
3 significant milestones (e.g., attaining a career, getting married etc) within a shortened  
4  
5  
6 lifespan [41].  
7

### 8 ***Fluctuating health***

9  
10  
11 Ill health could prevent physical activity either through illness exacerbations, or  
12  
13 exacerbations of symptoms [38, 39, 41, 43, 44]. Indeed, serious or disruptive events such as  
14  
15 hospitalisation and infections could deter even the most motivated of people [38, 39]; with  
16  
17 a participant in Moola et al's study [41] describing how draining physical activity can be  
18  
19 when sick: *"when I am really sick, I even find brushing my teeth difficult"* (P54).  
20  
21  
22

23  
24 Symptoms, such as breathlessness, fatigue, and coughing exacerbated the perceived  
25  
26 unpleasantness associated with physical activity; leading to avoidance of activity whenever  
27  
28 possible [40, 43, 44]. In contrast, relative "wellness" appeared to inspire some to be more  
29  
30 active [39], with one participant from Shelley's study [44] describing that he is active  
31  
32 because: *"I am generally quite well, I can do it... I tend to have quite a high lung function,*  
33  
34 *and I don't really get ill a lot..."*(P340). Depression, although not a strong theme, was an  
35  
36 issue raised in two studies [39, 41] as potentially having a detrimental impact on physical  
37  
38 activity. In particular, Moola et al [39] presents a quote from a participant describing how  
39  
40 her decline in activity signifies a decline in her health:  
41  
42  
43  
44

45  
46  
47 *"I also know that I am not going to live as long as everybody else so that is hard. I feel like it*  
48  
49 *is out of my control, I feel helpless, how I used to be able to do it (physical activity), and now*  
50  
51 *I can't. It is kind of depressing. It makes me think that it is a progressive disease, and it make*  
52  
53 *me think that it is getting worse . . . it makes me worried"* (P55).  
54  
55  
56  
57  
58  
59  
60

## **Normality**

The concept of normality was highlighted in three of the seven studies [40, 41, 44].

Normality appeared to be both a motive for physical activity [39], as well as a barrier to physical activity [39, 40]. For some, physical activity was used to provide an opportunity for the young people to feel normal. It provided a window within which they considered themselves to be 'just like everyone else' [44]. Physical activity appeared to minimise differences between themselves and those without CF. For example, Shelley et al [44] present a quote from one participant who states: *"It's like you're just doing it because you can, and you want to. You kind of feel the same as everyone else for an hour and a half"* (P6).

Interestingly, whilst some were of the opinion that physical activity was something that everyone, with or without chronic conditions, should be doing to improve their health [44], others felt that having CF meant that they had to take part in physical activity whilst their friends (without CF) did not [39]. Participants who felt they were in some way not normal were also more likely to report feeling self-conscious [39, 40]. Indeed, physical activity appeared to accentuate the extent to which some young people felt thin, or body conscious, or "not good at sport" compared with their peers [39, 40]. One parent participant in Moola et al's study [40] describes how her son: *"wonders if he is different... He avoids team sports where you need a big size... but he does care"* (P606).

## **Control beliefs**

Individual differences in perceptions relating their ability to control or manage their condition appeared to influence participants' use of active or passive coping strategies.

Whilst CF is a chronic condition that cannot be cured, individuals varied in the extent to

1  
2  
3 which they viewed CF as something that could be controlled and managed. Those who  
4  
5 adopted a fatalistic approach; i.e., were of the opinion that there was nothing that they  
6  
7 could do to *cure* CF, were less motivated to adopt positive self-care behaviours such as  
8  
9 physical activity [39, 41]. For example, one participant in Moola et al's study [39] describes  
10  
11 how her inability to cure her CF makes her unwilling to adopt certain selfcare behaviours:  
12  
13

14  
15  
16 *"If there was something that would get rid of CF, I would do it all the time [laughing]! It is*  
17  
18 *not like that.... It's like 'I have to do this for the rest of my life? Screw it! Who cares! I am not*  
19  
20 *going to do it anymore" (P36).*  
21

22  
23 In contrast, a second group of participants were of the opinion that they were in control of  
24  
25 their CF, and reported that having CF did not need to stop them or prevent them from doing  
26  
27 anything [38, 41, 44], provided they put their minds to it. In particular, one participant in  
28  
29 Shelley's study [44] states that: *"I know just because I've got CF doesn't mean I can't do it"*  
30  
31 *(P340).*  
32  
33

### 34 35 36 ***Coping Strategies*** 37

38  
39 Strategies for overcoming barriers to physical activity included both functional and  
40  
41 dysfunctional coping strategies. Studies discussed how participants had integrated  
42  
43 strategies for dealing with symptoms, such as slowing down, or resting when necessary [38].  
44  
45 To deal with structural barriers, people with CF [38, 40] and their parents [38] had a variety  
46  
47 of strategies; often involving elaborate planning [38]. For those who were self-conscious of  
48  
49 symptoms reported tactics such as avoiding physical activity in public places [40]. One  
50  
51 participant in the study by Fereday et al [38] describes a strategy of reducing the intensity of  
52  
53 the activity or resting whenever necessary: *"He coped and he kept wanting to play but he*  
54  
55 *really needed a break. After resting a couple of minutes he is as good as gold" (P8).*  
56  
57  
58  
59  
60

1  
2  
3 Others had strategies for dealing with difficult emotions [40], such as fear and anxiety [41].

4  
5 In particular, Moola et al [41] present a quote from a participant describing how positive  
6  
7 self-talk prevents them from giving up: *“When it is talked about it is a different issue... I tell  
8  
9 myself ‘that’s not true. You can do it – it is going to be harder, but you can still do it’” (P32).*

10  
11  
12  
13 However, for some, avoidance of physical activity was the preferred method of coping with  
14  
15 any embarrassment [40]. Indeed, one participant in Moola et al’s [40] study describes how  
16  
17 the embarrassment prevents her from taking part in certain activities: *“You can see my ribs  
18  
19 and I do not want to wear a two piece bathing suit or go swimming” (P605).*

### 22 23 **Facilities and opportunities**

24  
25  
26 Finally, availability of facilities was considered to have an impact on physical activity  
27  
28 behaviour [42, 44]. Good access to local community facilities (e.g., swimming pools, sports  
29  
30 centres) and private clubs were reported to increase physical activity among young people  
31  
32 with CF [44]. Having the opportunity to walk to school was also considered to promote  
33  
34 autonomy for physical activity [44]. In contrast, lack of access to “different” facilities, or  
35  
36 opportunities to try new and exciting activities were mentioned as barriers to physical  
37  
38 activity [44]. The emphasis here appeared to be not on the availability per se, but on the  
39  
40 availability of facilities that were not considered to be boring; for example, one participant  
41  
42 in Shelley’s study [44] described a limited range of facilities for different sports: *“A few more  
43  
44 different clubs that do different sports that are around, because there isn’t many” (P340).*

45  
46  
47 However, facilities and opportunities for physical activity appeared to be influenced by  
48  
49 seasonal variation; with more young people reportedly being more active in the summer  
50  
51 months [42].  
52  
53  
54  
55  
56  
57  
58  
59  
60

## Discussion

The aim of this systematic review was to examine and synthesise the qualitative literature on the barriers of and facilitators to physical activity among young people with CF. In contrast to previous reviews, the current review used systematic methods to identify and retrieve all relevant research. In accordance with the social-ecological model, our analysis highlights multiple and interacting influences on physical activity behaviour at the level of the individual, and the social and physical environment in which physical activity occurs. The value and importance placed on physical activity by the young people, as well as well as perceptions of normality, control, and coping strategies utilised by young people all appeared to be influenced by the social and physical environment in which they lived and performed activity.

As well as barriers and facilitators to physical activity that are specific to young people with chronic conditions, we also identified barriers and facilitators that are often cited in the literature in relation to young people without chronic conditions. In accordance with previous research [23, 24] highly valuing and/or enjoying physical activity, and having an active family or social group were identified as having a key role in facilitating physical activity. Likewise, a low value for physical activity, lack of enjoyment of physical activity, and sedentary or overbearing families have all been shown to negatively influence participation in physical activity. However, within this review, we were also able to identify key barriers and facilitators that are specific to young people with CF. Having relatively stable health- or the perception that CF does not need to prevent physical activity, and using physical activity as a vehicle to normality, appeared to facilitate engagement with physical activity. In contrast, fluctuating health status increased the potential for negative perceptions of

1  
2  
3 physical activity, low perception of control over CF, and use of passive coping strategies  
4  
5 appeared to hinder engagement in physical activity. Whilst the presence of competing  
6  
7 priorities is not limited to those with CF, this theme appeared to be particularly significant  
8  
9 for this population; largely due to a very time-consuming treatment regime combined with  
10  
11 time pressures faced by those with a reduced life expectancy. Systematic reviews have  
12  
13 shown that beliefs relating to the extent to which conditions (and associated symptoms) can  
14  
15 be cured or control influence behaviour among multiple populations [45] including  
16  
17 individuals with CF [46, 47]. The current review provides evidence to show that such beliefs  
18  
19 are also influential in physical activity CF behaviour. CF cannot be cured, and this at times  
20  
21 led to reports of despondency and feelings of hopelessness. In these circumstances,  
22  
23 engagement in physical activity was viewed as “pointless” given that it could not cure the  
24  
25 condition. Beliefs relating to the controllability of symptoms during physical activity could  
26  
27 also lead to avoidance of physical activity. In contrast, individuals who felt in control of their  
28  
29 CF and able to prevent or manage their symptoms – even during activity – were more likely  
30  
31 to have reported developing strategies to enable them to be active. These findings indicate  
32  
33 that identifying and modifying beliefs about the controllability of CF may facilitate attempts  
34  
35 to promote physical activity.  
36  
37  
38  
39  
40  
41  
42  
43  
44

45 The concept of “normality” is often used to explain the extent to which people adapt to or  
46  
47 accept life with a chronic condition [48-50]. The term is most frequently used to describe  
48  
49 the process of adjustment following a diagnosis of a chronic condition (e.g., cancer) [48],  
50  
51 and numerous typologies of normality have been proposed [51, 52]. For example,  
52  
53 individuals may develop a “normality” in which the condition is integrated and accepted  
54  
55 [51]. At the other end of the spectrum, individuals accept a disrupted normality in which  
56  
57 maintaining a normal life is rejected due to the overwhelming disruptions caused by the  
58  
59  
60



1  
2  
3 condition. Situated between these extremes are a group of individuals who strive to present  
4 a “normal life” despite the severity of symptoms or disruption [49]. Whilst this literature is  
5 usually referring to individuals with a biographical disruption [51], the concept of normality  
6 still appears to be relevant to individuals with CF. The seven studies included in this review  
7 provide examples of individuals for whom normality includes their CF. Such individuals were  
8 able to partake in physical activity through adaptations when necessary (e.g., resting, or  
9 slowing the pace of the activity). There were also examples of individuals who, in an attempt  
10 to appear normal, would avoid activity due to its potential to accentuate differences  
11 between the young person with CF and their peers. However, within the current review  
12 there were a group of individuals who used physical activity as a way of enabling normality;  
13 engaging in physical activity because it made them feel normal. Whilst this review has  
14 highlighted the influence of perceptions of normality in physical activity behaviour, further  
15 exploration of this concept in relation to individuals with CF is clearly needed.

16  
17  
18  
19  
20  
21  
22  
23  
24  
25  
26  
27  
28  
29  
30  
31  
32  
33  
34  
35 A key barrier to physical activity identified through this review was that of competing  
36 priorities. Young people with CF described reduced time for enjoyable activities as a result  
37 of a demanding treatment regime. This combined with an increased sense of urgency for  
38 spending time with friends and family and achieving key milestones as a result of a reduced  
39 life expectancy resulted in less enjoyable pursuits (such as physical activity) being  
40 overlooked. Promotion of physical activity as an enjoyable and social pastime could reduce  
41 the tension associated with these competing demands.

42  
43  
44  
45  
46  
47  
48  
49  
50  
51  
52  
53 Perceiving physical activity as fun, enjoyable, and enhancing autonomy appeared to be  
54 more important for long term engagement in physical activity, than the associated health  
55 benefits. This is consistent with self-determination theory [53]; which suggests that  
56  
57  
58  
59  
60

1  
2  
3 motivation for a particular activity can be either intrinsic or extrinsic. Intrinsic motivation  
4  
5 describes engagement in activities for the pleasure or satisfaction it provides. Extrinsic  
6  
7 motivation, in contrast, describes motivation for activities for an external outcome; for  
8  
9 example, avoiding ill health, or pressure from healthcare professionals. Whilst intrinsic  
10  
11 motivation is the most autonomous form of motivation, extrinsic motivation may be more  
12  
13 or less autonomous. Motivation that is not autonomous is less likely to be sustained over  
14  
15 time [54]. Self-determination theory has informed the development of a multitude of  
16  
17 successful interventions aiming to promote physical activity among a wide range of  
18  
19 populations [55-57], and the current research highlights that use of this theory in informing  
20  
21 interventions to support physical activity among individuals with CF may also be beneficial.  
22  
23 In accordance with the social-ecological model, the role of the social and physical  
24  
25 environment were identified as key influencers in the physical activity of young people. The  
26  
27 role of the family in influencing perceptions of physical activity and physical activity  
28  
29 behaviour among young people is widely accepted [58]. Studies included in the present  
30  
31 review provide additional support for the role of the family in acting as role models and  
32  
33 providing tangible and emotional support to promote and maintain physical activity.  
34  
35 However, in order to support young people to be active, families must have the necessary  
36  
37 knowledge regarding the importance of physical activity, in addition to knowing how to  
38  
39 support young people to be active. They must also have the physical and psychological  
40  
41 capacity to be able to support young people to be active; and this could be a challenge when  
42  
43 taking into consideration the stress and emotional consequences of having a young child  
44  
45 with a chronic condition. Indeed, some parents reported using physical activity to manage  
46  
47 their own stress and anxiety. This strongly supports a strategy that involving families in  
48  
49 attempts to promote physical activity among young people with CF is critical.  
50  
51  
52  
53  
54  
55  
56  
57  
58  
59  
60

1  
2  
3 Environmental factors; including access to social facilities and safe spaces have been  
4  
5 identified as key influencers in physical activity behaviour [24]. Congruent with previous  
6  
7 research, the current review identified a lack of facilities as a key barrier to physical activity.  
8  
9  
10 However, active travel, particularly when young people were able to do this independently  
11  
12 were identified as facilitators to physical activity [22]. A focus on facilitating and supporting  
13  
14 active travel may be beneficial.  
15  
16

### 17 18 **Strengths and limitations** 19

20  
21 The main strength of this work is that it brings together the qualitative literature that has  
22  
23 provided an in-depth account of the barriers and facilitators to physical activity among  
24  
25 young people with CF. To our knowledge, this is the first systematic review and meta-  
26  
27 synthesis to do so for this population. Through synthesising this work, we have presented  
28  
29 barriers and facilitators to physical activity among a wider sample of young people with CF  
30  
31 than could be obtained through individual qualitative studies alone, and with greater depth  
32  
33 than can be obtained through quantitative studies.  
34  
35  
36

37  
38 It must be noted that the perspective brought to the analysis is psychological. Interpretation  
39  
40 of the data in relation to the COM-B model and the Self Determination Theory may have  
41  
42 been influenced by prior exposure to these theories. We acknowledge that consideration of  
43  
44 other theories may have resulted in the data being organised and presented differently.  
45  
46  
47 However, every effort was made to ensure that all themes were clearly representative of  
48  
49 the data as presented in the original studies.  
50  
51

52  
53 Sixteen potentially relevant studies were only reported in abstract format. Although we  
54  
55 contacted authors to request full unpublished reports where available, none had plans to  
56  
57 develop manuscripts of their work in time for the work to be included in this review. Whilst  
58  
59  
60

1  
2  
3 the included studies were of moderate to high quality, reflexivity was often poorly  
4  
5 described. Future studies should provide greater detail about the relationship between the  
6  
7 researcher and the research process. As three of the studies included in the review were  
8  
9 authored by one research team, this may reflect a smaller distribution of participants,  
10  
11 potentially reducing the transferability of findings.  
12  
13

14  
15 We acknowledge that barriers and facilitators to physical activity are likely to be influenced  
16  
17 by demographic factors (age, gender, location) and current levels of physical activity. The  
18  
19 primary research included in the current review did not attempt to explore variations  
20  
21 between these populations, therefore we were limited in our ability to explore these issues  
22  
23 in the current analysis. For example, only one study required participants to monitor or  
24  
25 report their physical activity levels, and this study did not link activity levels to the quotes  
26  
27 provided.  
28  
29  
30  
31

### 32 33 **Implications for research and practice** 34

35  
36 This review provides further support for the idea that individuals with CF are likely to  
37  
38 engage with activities that are fun and enjoyable rather than focusing exclusively on the  
39  
40 health benefits of physical activity. In order to promote long-term, sustainable engagement  
41  
42 with physical activity, healthcare professionals should encourage and support young people  
43  
44 to identify activities that they find enjoyable, rather than focusing exclusively on the health  
45  
46 benefits associated with physical activity. Involving families in the process could also be  
47  
48 beneficial; as families are able to provide tangible and emotional support, as well as dealing  
49  
50 with organisational demands. However, this review also identified a range of psychosocial  
51  
52 issues, such as stress and poor coping skills that may hinder physical activity among young  
53  
54 people and their families. Engagement in physical activity is likely to increase if healthcare  
55  
56  
57  
58  
59  
60

1  
2  
3 professionals can facilitate a supportive environment in which physical activity can occur.

4  
5 This could necessitate dealing with psychological issues (e.g., stress or coping skills) before  
6  
7 attempting to promote physical activity.  
8  
9

10  
11 The number of potentially relevant articles identified through our search strategy implies  
12  
13 that promotion of physical activity is an important topic and of interest to clinical care  
14  
15 teams. We had to reject sixteen potentially relevant documents as they were only available  
16  
17 in abstract form. Developing methods for sharing or disseminating these data would be  
18  
19 beneficial as it would ensure that researchers do not duplicate work that has already been  
20  
21 completed and would also allow completed work to be included in systematic reviews or  
22  
23 synthesis so that they may be used to inform clinical practice.  
24  
25  
26  
27

## 28 **Conclusions**

29  
30  
31 In summary, this is the first synthesis of qualitative work that has explored barriers and  
32  
33 facilitators to physical activity among young people with CF. Previous reviews have been  
34  
35 unable to identify intervention characteristics that influence physical activity behaviour. It is  
36  
37 therefore unclear how best to support physical activity among this population. This review  
38  
39 provides detailed information on the physical, psychological and social influences of physical  
40  
41 activity behaviour, thus providing numerous targets for future interventions. Identifying and  
42  
43 targeting issues at any of these levels could facilitate promotion of physical activity among  
44  
45 this population. Our key recommendation would be that healthcare professionals work with their  
46  
47 patients to identify barriers and facilitators to physical activity that are specific to each individual.  
48  
49 We suggest that the findings from this review may provide a framework that healthcare  
50  
51 practitioners may use to structure discussions relating to physical activity, and could potentially  
52  
53 highlight some barriers (or facilitators) that may not previously have been considered.  
54  
55  
56  
57  
58  
59  
60

1  
2  
3  
4  
5  
6  
7  
8  
9  
10  
11  
12  
13  
14  
15  
16  
17  
18  
19  
20  
21  
22  
23  
24  
25  
26  
27  
28  
29  
30  
31  
32  
33  
34  
35  
36  
37  
38  
39  
40  
41  
42  
43  
44  
45  
46  
47  
48  
49  
50  
51  
52  
53  
54  
55  
56  
57  
58  
59  
60

For peer review only

## References

1. The Cystic Fibrosis Foundation. About Cystic Fibrosis. 2017. Available from <https://www.cff.org/What-is-CF/About-Cystic-Fibrosis/>
2. The Cystic Fibrosis Trust. UK Cystic Fibrosis Registry 2016 Annual Data Report. London. The Cystic Fibrosis Trust; 2017.
3. The Cystic Fibrosis Trust. Cystic Fibrosis Insight Survey - Report on the 2017 and 2018 surveys. London. The Cystic Fibrosis Trust; 2018.
4. The Cystic Fibrosis Trust. Standards of care and good clinical practice for the physiotherapy management of cystic fibrosis. Third edition. London, The Cystic Fibrosis Trust; 2017.
5. Pianosi, P., Leblanc, J., and Almudevar, A. Peak oxygen uptake and mortality in children with cystic fibrosis. *Thorax*, 2005. **60**(1): p. 50-4.
6. Radtke, T., Nolan, S., Hebestreit, H., and Kriemler, S. Physical exercise training for cystic fibrosis. *Cochrane Database of Systematic Reviews*, 2017. **11**: p. CD002768.
7. Gulmans, V.A., de Meer, K., Brackel, H.J., Faber, J.A., Berger, R., Helders, P.J. Outpatient exercise training in children with cystic fibrosis: physiological effects, perceived competence, and acceptability. *Pediatric Pulmonology*, 1999. **28**(1): p. 39-46.
8. Orenstein, D.M., Hovell, M.F., Mulvihill, M., Keating, K.K., Hofstetter, C.R., Kelsey, S., Morris, K., Nixon, P.A. Strength vs aerobic training in children with cystic fibrosis: a randomized controlled trial. *Chest*, 2004. **126**(4): p. 1204-14.

- 1  
2  
3 9. Barak, A., Wexler, I.D., Efrati, O., Bentur, L., Augarten, A., Mussaffi, H., Avital, A.,  
4 Rivlin, J., Aviram, M., Yahav, Y., Kerem, E. Trampoline use as physiotherapy for  
5 cystic fibrosis patients. *Pediatric Pulmonology*, 2005. **39**(1): p. 70-3.  
6  
7
- 8  
9  
10  
11 10. Orava, C., Fitzgerald, J., Figliomeni, S., Lam, D., Naccarato, A., Szego, E., Yoshida,  
12 K., Fox, P., Sykes, J., Wu, K. Relationship between Physical Activity and Fatigue in  
13 Adults with Cystic Fibrosis. *Physiotherapy Canada*, 2018. **70**(1): p. 42-48.  
14  
15
- 16  
17  
18  
19 11. Backstrom-Eriksson, L., Bergsten-Brucefors, A., Hjelte, L., Melin, B., Sorjonen, K.  
20 Associations between genetics, medical status, physical exercise and  
21 psychological well-being in adults with cystic fibrosis. *BMJ open respiratory*  
22 *research*, 2016. **3**(1): p. e000141.  
23  
24
- 25  
26  
27  
28  
29 12. Denford S; MackIntosh K; McNarry M, Barker, A., Williams C, Promotion of  
30 physical activity for adolescents with cystic fibrosis: A qualitative study of UK  
31 multi-disciplinary cystic fibrosis teams. *Physiotherapy* 2019.  
32  
33
- 34  
35  
36  
37 13. Stevens, D., et al., Oades, P., Armstrong, N., Williams, C. A survey of exercise  
38 testing and training in UK cystic fibrosis clinics. *Journal of Cystic Fibrosis*, 2010.  
39  
40  
41  
42 **9**(5): p. 302-6.  
43  
44
- 45  
46  
47  
48 14. Rowbotham, N. Question CF: A James Lind Alliance Priority Setting Partnership in  
49 cystic fibrosis. *Journal of Cystic Fibrosis*, 2017. **16**(Supplement 1): p. S38.  
50  
51
- 52  
53  
54  
55 15. Rowbotham, N., Smith, S., Leighton, P.A., Raynor, O.C., Gathercole, K., Elliot, Z.C.,  
56 Nash, E.F., Daniels, T., Duff, A.J.A., Collins, S, Chandran, S., People, U., Hurley,  
57 M.N., Brownlee, K., Smyth, A. The top 10 research priorities in cystic fibrosis  
58 developed by a partnership between people with CF and healthcare providers.  
59 *Thorax*, 2018. **73**(4): p. 388-390.  
60



- 1  
2  
3 16. Nixon, P.A., D.M. Orenstein, and S.F. Kelsey, Habitual physical activity in children  
4 and adolescents with cystic fibrosis. *Medicine and Science in Sports and Exercise*,  
5  
6 2001. **33**(1): p. 30-35.  
7  
8  
9
- 10  
11 17. Guthold, R., Stevens, G.A., Riley, L.M., Bull, F.C. Worldwide trends in insufficient  
12  
13 physical activity from 2001 to 2016: a pooled analysis of 358 population-based  
14  
15 surveys with 1.9 millions participants. *The Lancet Global Health*, 2018. **6**(10).  
16  
17
- 18  
19 18. Selvadurai, H.C., Blimkie, C.J., Cooper, P.J., Mellis, C.M., Van Asperen, P.P. Gender  
20  
21 differences in habitual activity in children with cystic fibrosis. *Archives of Disease*  
22  
23 in Childhood, 2004. **89**(10): p. 928-33.  
24  
25
- 26  
27 19. Nixon, P.A., Orenstein, D.M., Kelsey, S.F., Doershuk, C.F. The Prognostic Value of  
28  
29 Exercise Testing in Patients with Cystic-Fibrosis. *New England Journal of*  
30  
31 *Medicine*, 1992. **327**(25): p. 1785-1788.  
32  
33
- 34  
35 20. Cox, N.S., Alison, J.A., Holland, A.E. Interventions to promote physical activity in  
36  
37 people with cystic fibrosis. *Paediatric Respiratory Reviews*, 2014. **15**(3): p. 237-9.  
38  
39
- 40  
41 21. Craig, P., Peticrew, M. Developing and evaluating complex interventions:  
42  
43 Reflections on the 2008 MRC guidance. *International Journal of Nursing Studies*,  
44  
45 2013. **50**(5): p. 585-592.  
46  
47
- 48  
49 22. Condello, G., Puggina, A., Aleksovskaja, K. et al. Behavioral determinants of  
50  
51 physical activity across the life course: a “DEterminants of Diet and Physical  
52  
53 ACTivity” (DEDIPAC) umbrella systematic literature review. *Int J Behav Nutr Phys*  
54  
55 *Act* 14, 58 (2017) doi:10.1186/s12966-017-0510-2  
56  
57  
58  
59  
60

- 1  
2  
3 23. Allender, S., Cowburn, G., & Foster, C. Understanding participation in sport and  
4 physical activity among children and adults: a review of qualitative studies.  
5  
6 Health education research. 2006. **21**(6), 826-835.  
7  
8  
9  
10  
11 24. Martins, J., Marques, A., Sarmiento, H., & Carreiro da Costa, F. Adolescents'  
12 perspectives on the barriers and facilitators of physical activity: a systematic  
13 review of qualitative studies. Health education research. 2015. **30**(5), 742-755  
14  
15  
16  
17  
18 25. Moore, G. F., Audrey, S., Barker, M., Bond, L., Bonell, C., Hardeman, W., ... &  
19 Baird, J. Process evaluation of complex interventions: Medical Research Council  
20 guidance. BMJ, 2015. **350**, h1258  
21  
22  
23  
24  
25  
26 26. Yardley L, Morrison L, Bradbury K, Muller I. The person-based approach to  
27 intervention development: application to digital health-related behaviour change  
28 interventions. J Med Internet Res. 2015. **17**(1):e30.  
29  
30  
31  
32  
33  
34 27. Michie, S., Johnston, M., Francis, J., Hardeman, W., Eccles, M. From Theory to  
35 Intervention: Mapping Theoretical Derived Behavioural Determinants to  
36 Behaviour Change Techniques. Applied Psychology, 2008. **57**(4): p. 660-680.  
37  
38  
39  
40  
41  
42 28. Prasad, S.A., & Cerny, F.J. Factors that influence adherence to exercise and their  
43 effectiveness: application to cystic fibrosis. Pediatr Pulmonol, 2002. **34**(1): p. 66-  
44 72.  
45  
46  
47  
48  
49  
50 29. Moran, F. and J. Bradley, Incorporating exercise into the routine care of  
51 individuals with cystic fibrosis: is the time right? Expert Rev Respir Med, 2010.  
52  
53  
54  
55 **4**(2): p. 139-42.  
56  
57  
58  
59  
60

- 1  
2  
3  
4  
5  
6  
7  
8  
9  
10  
11  
12  
13  
14  
15  
16  
17  
18  
19  
20  
21  
22  
23  
24  
25  
26  
27  
28  
29  
30  
31  
32  
33  
34  
35  
36  
37  
38  
39  
40  
41  
42  
43  
44  
45  
46  
47  
48  
49  
50  
51  
52  
53  
54  
55  
56  
57  
58  
59  
60
30. Rand, S.P., & Prasad, S.A. Exercise as part of a cystic fibrosis therapeutic routine. *Expert Review of Respiratory Medicine*, 2012. **6**(3): p. 341-51.
31. Sallis, J., & Owen, N. (2015). Ecological models of health behavior. In K. Glanz, B. Rimer, & 724 K. Viswanath (Eds.), *Health behavior. Theory, research and practice* (5th ed., pp. 43-725 64). CA, USA: Joessey-Bass
32. Moher, D., Liberati, A., Tetzlaff, J., Douglas, G., Altman, D.S. Preferred reporting items for systematic reviews and meta-analyses: The PRISMA statement. *Annals of Internal Medicine*, 2009. **151**(4): p. 264-269.
33. Critical Appraisal Skills Programme: Making sense of evidence; 1993. Available from <https://casp-uk.net/>
34. Moolchaem, P., Liamputtong, P., O'Halloran, P., Muhamad, R. The Lived Experience of Transgender Persons: A Meta-Synthesis. *Journal of Gay & Lesbian Social Services*, 2015. **27**(2): p. 143-171.
35. Duggleby, W., Holtslander, L., Kylma, J., Hammond, C., Williams, A. Meta-synthesis of the Hope Experience of Family Caregivers of Persons With Chronic Illness. *Qualitative Health Research*, 2010. **20**(2): p. 148-58.
36. Barnett-Page, E., & Thomas, J. Methods for the synthesis of qualitative research: a critical review. *BMC medical research methodology*, 2009. **9**(1): p. 1.
37. Thomas, J., & Harden, A. Methods for the thematic synthesis of qualitative research in systematic reviews. *BMC Medical Research Methodology*, 2008. **8**(45).

- 1  
2  
3  
4  
5  
6  
7  
8  
9  
10  
11  
12  
13  
14  
15  
16  
17  
18  
19  
20  
21  
22  
23  
24  
25  
26  
27  
28  
29  
30  
31  
32  
33  
34  
35  
36  
37  
38  
39  
40  
41  
42  
43  
44  
45  
46  
47  
48  
49  
50  
51  
52  
53  
54  
55  
56  
57  
58  
59  
60
38. Fereday, J., macDougal, C., Spizzo, M., Darbyshire, P., Schiller, W. "There's nothing I can't do--I just put my mind to anything and I can do it": a qualitative analysis of how children with chronic disease and their parents account for and manage physical activity. *BMC Pediatrics*, 2009. **9**: p. 1.
  39. Moola, F.J., & Faulkner, G.E. 'A tale of two cases:' the health, illness, and physical activity stories of two children living with cystic fibrosis. *Clinical Child Psychology & Psychiatry*, 2014. **19**(1): p. 24-42.
  40. Moola, F.J., Faulkner, G.R., Kirsh, J.A., Schneiderman, J. Developing physical activity interventions for youth with cystic fibrosis and congenital heart disease: Learning from their parents. *Psychology of Sport and Exercise*, 2011. **12**(6): p. 599-608.
  41. Moola, F.J., Faulkner, G.E., Schneiderman, J.E. "No time to play": perceptions toward physical activity in youth with cystic fibrosis. *Adapted Physical Activity Quarterly*, 2012. **29**(1): p. 44-62.
  42. Happ, M.B., Hoffman, L.A., Higgins, L.W., Divirgilio, D., Orenstein, D.M. Parent and child perceptions of a self-regulated, home-based exercise program for children with cystic fibrosis. *Nursing Research*, 2013. **62**(5): p. 305-314.
  43. Swisher, A.K., & Erickson, M. Perceptions of physical activity in a group of adolescents with cystic fibrosis. *Cardiopulmonary Physical Therapy Journal*, 2008. **19**(4): p. 107-13.
  44. Shelley, J., Fairclough, S.J., Knowles, Z.R., Southern, K.W., McCormack, P., Dawson, E.A., Graves, L.E.F., Hanlon, C. A formative study exploring perceptions

- 1  
2  
3 of physical activity monitoring among children and young people with cystic  
4  
5 fibrosis and health care professionals. *BMC Pediatrics*, 2018. **18**: p. 335.  
6  
7  
8  
9 45. Hagger, M., & Orbell, M. A Meta-Analytic Review of the Common-Sense Model of  
10  
11 Illness Representations. *Psychology & Health*, 2003. **18**(2): p. 141-184.  
12  
13  
14 46. Sylvain, C., Iamothe, L., Berthiaume, Y., Rabasa-Lhoret, R. How patients'  
15  
16 representations of cystic fibrosis-related diabetes inform their health behaviours.  
17  
18 *Psychology & Health*, 2016. **31**(10): p. 1129-1144.  
19  
20  
21 47. Bucks, R.S., Hawkins, K., Skinner, T.C., Horn, S., Seddon, P., Horne, R. Adherence  
22  
23 to treatment in adolescents with cystic fibrosis: The role of illness perceptions  
24  
25 and treatment beliefs. *Journal of Pediatric Psychology*, 2009. **34**(8): p. 893-902.  
26  
27  
28  
29 48. Bury, M. Chronic illness as a biographical disruption. *Sociology of Health and*  
30  
31 *Illness*, 1982. **4**: p. 167-182.  
32  
33  
34  
35 49. Knafl, K., & Deatrick, J. How families manage chronic conditions: An analysis of  
36  
37 the concept of normalisation *Research in Nursing and Health*, 1986. **9**: p. 215.  
38  
39  
40  
41 50. Taylor, M., Gibson, F., Franck, L. The experience of living with a chronic illness  
42  
43 during adolescence: a critical review of the literature *Journal of clinical nursing*,  
44  
45 2008. **17**(23): p. 3083.  
46  
47  
48  
49 51. Sanderson, T., Calnan, M., Morris, M., Richards, P, Hewlett, S. Shifting  
50  
51 normalities: interactions of changing conceptions of a normal life and the  
52  
53 normalisation of symptoms in rheumatoid arthritis. *Sociology of Health and*  
54  
55 *Illness*, 2011. **4**: p. 618-33.  
56  
57  
58  
59  
60

- 1  
2  
3 52. Frank, A. *The Wounded Story Teller: Body, Illness and Ethics*. 1997, Chicago, IL:  
4 Chicago University Press.  
5  
6  
7  
8  
9 53. Deci, E.L., & Ryan, R.M. *Intrinsic motivation and self-determination in human*  
10 *behavior. Perspectives in social psychology*. 1985, New York: Plenum. xv, 371 p.  
11  
12  
13  
14 54. Deci, E., & Ryan, R. *Self-determination theory: A macrotheory of human*  
15 *motivation, development and health. Canadian Psychology/Psychologie*  
16 *canadienne*, 2008. **49**(3): p. 182-185.  
17  
18  
19  
20  
21  
22 55. Russell, K.L., & Bray, S.R. *Promoting self-determined motivation for exercise in*  
23 *cardiac rehabilitation: the role of autonomy support. Rehabil Psychol*, 2010.  
24  
25  
26 **55**(1): p. 74-80.  
27  
28  
29  
30 56. Silva, M.N., Vieira, P.N., Coutinho, S.R., Minderico, C.S., Matos, M.G., Sardinha,  
31 L.B., Teixeira, P.J. *Using self-determination theory to promote physical activity*  
32 *and weight control: a randomized controlled trial in women. J Behav Med*, 2010.  
33  
34  
35  
36 **33**(2): p. 110-22.  
37  
38  
39  
40 57. Sweet, S.N., Fortia, M.S., Strachan, S.M., Blanchard, C.M., Boulay, P. *Testing a*  
41 *Longitudinal Integrated Self-Efficacy and Self-Determination Theory Model for*  
42 *Physical Activity Post-Cardiac Rehabilitation. Health Psychol Res*, 2014. **2**(1): p.  
43  
44  
45  
46  
47  
48  
49  
50 58. Brown, H., Atkin, A.J., Panter, J., Wong, G., Chinapaw, M.J., van Sluijs, E.M. *Family*  
51 *based interventions to increase physical activity in children: A systematic review,*  
52 *meta-analysis and realist synthesis. Obesity Reviews*, 2016. **17**.  
53  
54  
55  
56  
57  
58  
59  
60

1  
2  
3  
4  
5  
6  
7  
8  
9  
10  
11  
12  
13  
14  
15  
16  
17  
18  
19  
20  
21  
22  
23  
24  
25  
26  
27  
28  
29  
30  
31  
32  
33  
34  
35  
36  
37  
38  
39  
40  
41  
42  
43  
44  
45  
46  
47  
48  
49  
50  
51  
52  
53  
54  
55  
56  
57  
58  
59  
60

Figure legends:

Figure 1. PRISMA flow diagram

For peer review only

Table 1: Characteristics of included studies

| Reference    | Location  | Participants                                                                                                          | Data collection                                                                                    | Data analysis                          | Summary of findings                                                                                                                                                                                                                                                                                                                                                                                         |
|--------------|-----------|-----------------------------------------------------------------------------------------------------------------------|----------------------------------------------------------------------------------------------------|----------------------------------------|-------------------------------------------------------------------------------------------------------------------------------------------------------------------------------------------------------------------------------------------------------------------------------------------------------------------------------------------------------------------------------------------------------------|
| Fereday 2009 | Australia | 25 participants (aged 4 to 16 years).<br>Fourteen had a diagnosis of type 1 diabetes, 6 asthma and 5 cystic fibrosis. | A combination of focus groups, interviews, drawing maps, taking photos, and traffic light posters. | Interpretive phenomenological analysis | Children and young people described their active participation in a wide variety of physical activities including organised sports and play but made very little mention of any negative influence or impact due to their disease. Their parents' stories described the diligent background planning and management undertaken to enable their child to participate in a wide range of physical activities. |



1  
2  
3  
4  
5  
6  
7  
8  
9  
10  
11  
12  
13  
14  
15  
16  
17  
18  
19  
20  
21  
22  
23  
24  
25  
26  
27  
28  
29  
30  
31  
32  
33  
34  
35  
36  
37  
38  
39  
40  
41  
42  
43  
44  
45  
46

---

|      |     |                             |              |                   |                                                       |
|------|-----|-----------------------------|--------------|-------------------|-------------------------------------------------------|
| Happ | USA | Eleven child-parent         | Individual   | Thematic analysis | Five major thematic categories describing child       |
| 2013 |     | pairs. Five girls, six boys | child and    |                   | and parent perceptions and experience of the          |
|      |     | (aged 10-16 years). All     | parent       |                   | bicycle exercise program were identified in the       |
|      |     | had a diagnosis of CF.      | interviews,  |                   | transcripts: (a) motivators; (b) barriers; (c)        |
|      |     | Six children were from      | conducted at |                   | effort/work; (d) exercise routine; (e) sustaining     |
|      |     | the experimental group,     | two months   |                   | exercise. Research participation, parent-family       |
|      |     | and five from the           | into the     |                   | participation, health benefits, and the child's       |
|      |     | attention-control group.    | exercise     |                   | personality traits were primary motivators.           |
|      |     | Parent interview            | program and  |                   | Competing activities, priorities and responsibilities |
|      |     | participants were nine      | again at six |                   | were the major barriers to implementing the           |
|      |     | mothers and four            | months       |                   | exercise program as prescribed. Motivation waned      |
|      |     | fathers, ages 29–51         |              |                   | and the novelty wore off for several                  |
|      |     | years.                      |              |                   | (approximately half) parent-child dyads, who          |

---

|               |        |                                                                                                           |                                                        |                     |                                                                                                                                                                                                                                                                                                                                                                                                                                                                                                  |
|---------------|--------|-----------------------------------------------------------------------------------------------------------|--------------------------------------------------------|---------------------|--------------------------------------------------------------------------------------------------------------------------------------------------------------------------------------------------------------------------------------------------------------------------------------------------------------------------------------------------------------------------------------------------------------------------------------------------------------------------------------------------|
|               |        | All participants were<br>Caucasian.                                                                       |                                                        |                     | planned to decrease or stop the exercise program<br>after the study ended.                                                                                                                                                                                                                                                                                                                                                                                                                       |
| Moola<br>2014 | Canada | Two children. One male,<br>one female.<br>Participants were<br>randomly selected from<br>an ongoing trial | Semi<br>structured<br>interviews<br>and field<br>notes | Case study analysis | The findings beg researchers to consider (a) how<br>children with life-limiting diseases borrow multiple<br>illness narrative types, (b) the role of development<br>in influencing the kinds of stories that children can<br>tell, and (c) the impact of illness narratives on<br>physical activity. By rendering the tales of two CF<br>youth in this study, we respond to Aurthur Frank's<br>call; taking a multiple narrative turn, we listen to<br>stories of a different kind of suffering. |
| Moola<br>2012 | Canada | Fourteen participants.<br>Ten males, five females                                                         | Semi<br>structured<br>interviews                       | Grounded theory     | The participants demonstrated positive or<br>negative perceptions toward physical activity and<br>different experiences—such as parental support                                                                                                                                                                                                                                                                                                                                                 |

1  
2  
3  
4  
5  
6  
7  
8  
9  
10  
11  
12  
13  
14  
15  
16  
17  
18  
19  
20  
21  
22  
23  
24  
25  
26  
27  
28  
29  
30  
31  
32  
33  
34  
35  
36  
37  
38  
39  
40  
41  
42  
43  
44  
45  
46

---

(aged 11 to 17). All had

a diagnosis of CF.

Although the majority of

the sample was

Caucasian, one

participant self-

identified as Black and

the other as East Indian.

and illness narratives—influenced youths’

perceptions. In addition, the participants

experienced physical activity within the context of

reduced time. Recommendations for developing

physical activity interventions, including the

particular need to ensure that such interventions

are not perceived as wasteful of time, are

provided.

---

Moola

Canada

Twenty-nine parents

Semi

Thematic analysis

Parents discussed the numerous benefits and

2011

who provided care to a

structured

barriers associated with physical activity for both

CF or CHD child between

interviews

child and self. Role modelling was a critical social

the ages of 10 and 18,

process to overcoming barriers. Parents

participated (16 parents

experiences were situated within the broader

from the CF clinic and 13

---

parents from the CHD  
centre).

family context characterized by a prevailing sense  
of stress and complexity.

Parents were from a  
range of urban and rural  
locations across Ontario  
and Quebec and access  
to physical activity  
opportunities varied

|                 |    |                                                                                                                                  |                                  |                                              |                                                                                                                                                                                                                                                                                                                  |
|-----------------|----|----------------------------------------------------------------------------------------------------------------------------------|----------------------------------|----------------------------------------------|------------------------------------------------------------------------------------------------------------------------------------------------------------------------------------------------------------------------------------------------------------------------------------------------------------------|
| Shelley<br>2018 | UK | Nine participants, five<br>female, four male (aged<br>8 to 16 years). All<br>participants had a<br>confirmed diagnosis of<br>CF. | Semi<br>structured<br>interviews | Interpretive<br>phenomenological<br>analysis | Findings suggest that experiences of PA in children<br>and young people with CF are largely comparable<br>to their non-CF peers, with individuals engaging in<br>a variety of activities. CF was not perceived as a<br>barrier per se, although participants<br>acknowledged that they could be limited by their |
|-----------------|----|----------------------------------------------------------------------------------------------------------------------------------|----------------------------------|----------------------------------------------|------------------------------------------------------------------------------------------------------------------------------------------------------------------------------------------------------------------------------------------------------------------------------------------------------------------|

1  
2  
3  
4  
5  
6  
7  
8  
9  
10  
11  
12  
13  
14  
15  
16  
17  
18  
19  
20  
21  
22  
23  
24  
25  
26  
27  
28  
29  
30  
31  
32  
33  
34  
35  
36  
37  
38  
39  
40  
41  
42  
43  
44  
45  
46

---

symptoms. Maintenance of health emerged as a key facilitator, in some cases PA offered patients the opportunity to 'normalise' their condition. Participants reported enjoying wearing the monitoring devices and had good compliance. Wrist-worn devices and devices providing feedback were preferred. HCPs recognised the potential benefits of the devices in clinical practice. Recommendations based on these findings are that interventions to promote PA in children and young people with CF should be individualised and involve families to promote PA as part of an active lifestyle. Patients should

---

receive support alongside the PA data obtained from monitoring devices.

|    |         |     |                        |            |                     |
|----|---------|-----|------------------------|------------|---------------------|
| 1  |         |     |                        |            |                     |
| 2  |         |     |                        |            |                     |
| 3  |         |     |                        |            |                     |
| 4  |         |     |                        |            |                     |
| 5  |         |     |                        |            |                     |
| 6  |         |     |                        |            |                     |
| 7  |         |     |                        |            |                     |
| 8  |         |     |                        |            |                     |
| 9  |         |     |                        |            |                     |
| 10 |         |     |                        |            |                     |
| 11 |         |     |                        |            |                     |
| 12 |         |     |                        |            |                     |
| 13 | Swisher | USA | Ten participants (aged | Semi       | Verbatim and        |
| 14 |         |     | 13 to 17 years). All   | structured | transcripts were    |
| 15 | 2008    |     | participants had a     | telephone  | coded using the     |
| 16 |         |     | diagnosis of CF.       | interviews | line-by-line coding |
| 17 |         |     |                        |            | process; thus       |
| 18 |         |     |                        |            | allowing the        |
| 19 |         |     |                        |            | researcher to       |
| 20 |         |     |                        |            | deconstruct the     |
| 21 |         |     |                        |            | data into discrete  |
| 22 |         |     |                        |            | pieces of           |
| 23 |         |     |                        |            | information that    |
| 24 |         |     |                        |            |                     |
| 25 |         |     |                        |            |                     |
| 26 |         |     |                        |            |                     |
| 27 |         |     |                        |            |                     |
| 28 |         |     |                        |            |                     |
| 29 |         |     |                        |            |                     |
| 30 |         |     |                        |            |                     |
| 31 |         |     |                        |            |                     |
| 32 |         |     |                        |            |                     |
| 33 |         |     |                        |            |                     |
| 34 |         |     |                        |            |                     |
| 35 |         |     |                        |            |                     |
| 36 |         |     |                        |            |                     |
| 37 |         |     |                        |            |                     |
| 38 |         |     |                        |            |                     |
| 39 |         |     |                        |            |                     |
| 40 |         |     |                        |            |                     |
| 41 |         |     |                        |            |                     |
| 42 |         |     |                        |            |                     |
| 43 |         |     |                        |            |                     |
| 44 |         |     |                        |            |                     |
| 45 |         |     |                        |            |                     |
| 46 |         |     |                        |            |                     |

1  
2  
3  
4 could be compared

5  
6 and grouped into

7  
8 categories. In order

9  
10 for a code to be

11  
12 assigned to a

13  
14 response, the code

15  
16 had to be identified

17  
18 by both principal

19  
20 investigators and

21  
22 the graduate

23  
24 student.  
25  
26  
27  
28  
29  
30

Table 2. Quality assessment

| Article         | Clear Aim | Appropriate methodology | Appropriate research design | Appropriate recruitment strategy | Data collection addressed the research issues | Adequate consideration of reflexivity | Ethical issues | Sufficient rigor of data analysis | Clear statements of findings | Valuable research | Total |
|-----------------|-----------|-------------------------|-----------------------------|----------------------------------|-----------------------------------------------|---------------------------------------|----------------|-----------------------------------|------------------------------|-------------------|-------|
| Fereday         | Yes       | Yes                     | 3                           | 2                                | 3                                             | 1                                     | 3              | 3                                 | 3                            | 3                 | 21    |
| Happ            | Yes       | Yes                     | 3                           | 2                                | 3                                             | 1                                     | 3              | 3                                 | 3                            | 3                 | 21    |
| Moola<br>(2014) | Yes       | Yes                     | 3                           | 3                                | 3                                             | 2                                     | 3              | 3                                 | 3                            | 3                 | 23    |
| Moola<br>(2012) | Yes       | Yes                     | 3                           | 2                                | 3                                             | 2                                     | 3              | 3                                 | 3                            | 3                 | 22    |



|         |     |     |   |   |   |   |   |   |   |   |    |
|---------|-----|-----|---|---|---|---|---|---|---|---|----|
| Moola   | Yes | Yes | 3 | 3 | 3 | 2 | 3 | 3 | 3 | 3 | 23 |
| (2011)  |     |     |   |   |   |   |   |   |   |   |    |
| Shelley | Yes | Yes | 3 | 3 | 3 | 1 | 3 | 3 | 2 | 3 | 21 |
| Swisher | Yes | Yes | 3 | 2 | 3 | 2 | 3 | 3 | 3 | 3 | 22 |

For peer review only

1  
2  
3  
4  
5  
6  
7  
8  
9  
10  
11  
12  
13  
14  
15  
16  
17  
18  
19  
20  
21  
22  
23  
24  
25  
26  
27  
28  
29  
30  
31  
32  
33  
34  
35  
36  
37  
38  
39  
40  
41  
42  
43  
44  
45  
46  
47

For peer review only

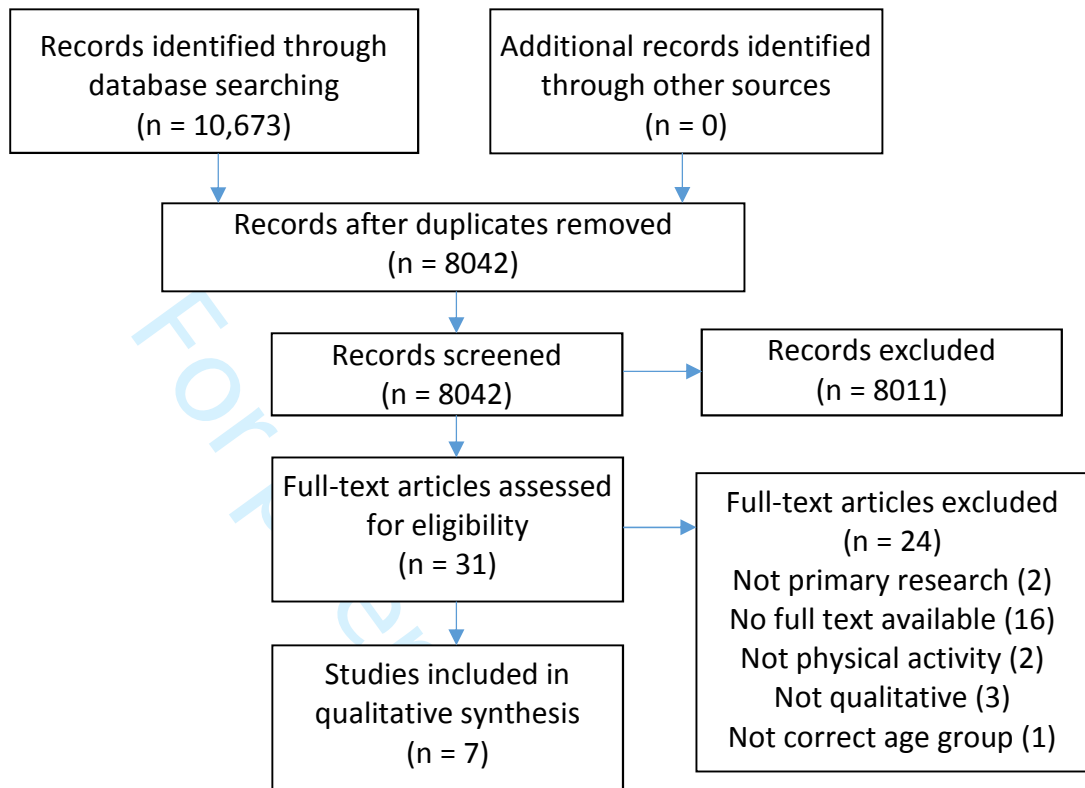

Figure 1. PRISMA flow diagram

| Section/topic       | # | Checklist item                                                                                                                                                                                                                                                                                              | Reported on page # |
|---------------------|---|-------------------------------------------------------------------------------------------------------------------------------------------------------------------------------------------------------------------------------------------------------------------------------------------------------------|--------------------|
| <b>TITLE</b>        |   |                                                                                                                                                                                                                                                                                                             |                    |
| Title               | 1 | Identify the report as a systematic review, meta-analysis, or both.                                                                                                                                                                                                                                         | 1                  |
| <b>ABSTRACT</b>     |   |                                                                                                                                                                                                                                                                                                             |                    |
| Structured summary  | 2 | Provide a structured summary including, as applicable: background; objectives; data sources; study eligibility criteria, participants, and interventions; study appraisal and synthesis methods; results; limitations; conclusions and implications of key findings; systematic review registration number. | 4                  |
| <b>INTRODUCTION</b> |   |                                                                                                                                                                                                                                                                                                             |                    |
| Rationale           | 3 | Describe the rationale for the review in the context of what is already known.                                                                                                                                                                                                                              | 7/8                |
| Objectives          | 4 | Provide an explicit statement of questions being addressed with reference to participants, interventions, comparisons, outcomes, and study design (PICOS).                                                                                                                                                  | 9                  |
| <b>METHODS</b>      |   |                                                                                                                                                                                                                                                                                                             |                    |

|                           |    |                                                                                                                                                                                                        |            |
|---------------------------|----|--------------------------------------------------------------------------------------------------------------------------------------------------------------------------------------------------------|------------|
| Protocol and registration | 5  | Indicate if a review protocol exists, if and where it can be accessed (e.g., Web address), and, if available, provide registration information including registration number.                          | NA         |
| Eligibility criteria      | 6  | Specify study characteristics (e.g., PICOS, length of follow-up) and report characteristics (e.g., years considered, language, publication status) used as criteria for eligibility, giving rationale. | 10/11      |
| Information sources       | 7  | Describe all information sources (e.g., databases with dates of coverage, contact with study authors to identify additional studies) in the search and date last searched.                             | 10/11      |
| Search                    | 8  | Present full electronic search strategy for at least one database, including any limits used, such that it could be repeated.                                                                          | Appendix 1 |
| Study selection           | 9  | State the process for selecting studies (i.e., screening, eligibility, included in systematic review, and, if applicable, included in the meta-analysis).                                              | 10/11      |
| Data collection process   | 10 | Describe method of data extraction from reports (e.g., piloted forms, independently, in duplicate) and any processes for obtaining and confirming data from investigators.                             | 12         |
| Data items                | 11 | List and define all variables for which data were sought (e.g., PICOS, funding sources) and any assumptions and simplifications made.                                                                  | 11         |

1  
2  
3  
4  
5  
6  
7  
8  
9  
10  
11  
12  
13  
14  
15  
16  
17  
18  
19  
20  
21  
22  
23  
24  
25  
26  
27  
28  
29  
30  
31  
32  
33  
34  
35  
36  
37  
38  
39  
40  
41  
42  
43  
44  
45  
46

|                                    |    |                                                                                                                                                                                                                        |                    |
|------------------------------------|----|------------------------------------------------------------------------------------------------------------------------------------------------------------------------------------------------------------------------|--------------------|
| Risk of bias in individual studies | 12 | Describe methods used for assessing risk of bias of individual studies (including specification of whether this was done at the study or outcome level), and how this information is to be used in any data synthesis. | 12                 |
| Summary measures                   | 13 | State the principal summary measures (e.g., risk ratio, difference in means).                                                                                                                                          | 13                 |
| Synthesis of results               | 14 | Describe the methods of handling data and combining results of studies, if done, including measures of consistency (e.g., $I^2$ ) for each meta-analysis.                                                              | 13                 |
| Section/topic                      | #  | Checklist item                                                                                                                                                                                                         | Reported on page # |
| Risk of bias across studies        | 15 | Specify any assessment of risk of bias that may affect the cumulative evidence (e.g., publication bias, selective reporting within studies).                                                                           |                    |
| Additional analyses                | 16 | Describe methods of additional analyses (e.g., sensitivity or subgroup analyses, meta-regression), if done, indicating which were pre-specified.                                                                       |                    |
| <b>RESULTS</b>                     |    |                                                                                                                                                                                                                        |                    |
| Study selection                    | 17 | Give numbers of studies screened, assessed for eligibility, and included in the review, with                                                                                                                           | Flow               |

|                               |    |                                                                                                                                                                                                          |              |
|-------------------------------|----|----------------------------------------------------------------------------------------------------------------------------------------------------------------------------------------------------------|--------------|
|                               |    | reasons for exclusions at each stage, ideally with a flow diagram.                                                                                                                                       | diagram<br>1 |
| Study characteristics         | 18 | For each study, present characteristics for which data were extracted (e.g., study size, PICOS, follow-up period) and provide the citations.                                                             | Table 1      |
| Risk of bias within studies   | 19 | Present data on risk of bias of each study and, if available, any outcome level assessment (see item 12).                                                                                                | Table 2      |
| Results of individual studies | 20 | For all outcomes considered (benefits or harms), present, for each study: (a) simple summary data for each intervention group (b) effect estimates and confidence intervals, ideally with a forest plot. | Table 1      |
| Synthesis of results          | 21 | Present results of each meta-analysis done, including confidence intervals and measures of consistency.                                                                                                  | NA           |
| Risk of bias across studies   | 22 | Present results of any assessment of risk of bias across studies (see Item 15).                                                                                                                          | Table 2      |
| Additional analysis           | 23 | Give results of additional analyses, if done (e.g., sensitivity or subgroup analyses, meta-regression [see Item 16]).                                                                                    | NA           |

| <b>DISCUSSION</b>   |    |                                                                                                                                                                                      |       |
|---------------------|----|--------------------------------------------------------------------------------------------------------------------------------------------------------------------------------------|-------|
| Summary of evidence | 24 | Summarize the main findings including the strength of evidence for each main outcome; consider their relevance to key groups (e.g., healthcare providers, users, and policy makers). | 25    |
| Limitations         | 25 | Discuss limitations at study and outcome level (e.g., risk of bias), and at review-level (e.g., incomplete retrieval of identified research, reporting bias).                        | 29    |
| Conclusions         | 26 | Provide a general interpretation of the results in the context of other evidence, and implications for future research.                                                              | 31/32 |
| <b>FUNDING</b>      |    |                                                                                                                                                                                      |       |
| Funding             | 27 | Describe sources of funding for the systematic review and other support (e.g., supply of data); role of funders for the systematic review.                                           | 6     |



## Search strategy

1. Exp Cystic Fibrosis/
2. Cystic fibrosis.[tiab]
3. CF.[tiab]
4. Or/1-3
5. Exp Physical Activity/
6. Exp Exercise /
7. Exp Sport /
8. Active\*
9. Fitness
10. Training
11. Exercise\*
12. Movement\*
13. Physical\*
14. Sport\*
15. Yoga
16. "Active minutes"
17. "Leisure time"
18. "Resistance training"
19. "Strength training"
20. Cardiovascular
21. Or/5-20

1  
2  
3 ASSIA on ProQuest  
4

5  
6 CINAHL on EBSCOHost  
7

8  
9 EMBASE on OVIDSP,  
10

11  
12 MEDLINE on OVIDSP  
13

14  
15 MEDLINE-in-process on OVIDSP  
16

17  
18 PsycINFO on OVIDSP  
19  
20  
21  
22  
23  
24  
25  
26  
27  
28  
29  
30  
31  
32  
33  
34  
35  
36  
37  
38  
39  
40  
41  
42  
43  
44  
45  
46  
47  
48  
49  
50  
51  
52  
53  
54  
55  
56  
57  
58  
59  
60

For peer review only

# BMJ Open

## Barriers and facilitators to physical activity among children, adolescents, and young adults with cystic fibrosis: A systematic review and thematic synthesis of qualitative of research

|                                 |                                                                                                                                                                                                                                                                                                                                                                                                   |
|---------------------------------|---------------------------------------------------------------------------------------------------------------------------------------------------------------------------------------------------------------------------------------------------------------------------------------------------------------------------------------------------------------------------------------------------|
| Journal:                        | <i>BMJ Open</i>                                                                                                                                                                                                                                                                                                                                                                                   |
| Manuscript ID                   | bmjopen-2019-035261.R2                                                                                                                                                                                                                                                                                                                                                                            |
| Article Type:                   | Original research                                                                                                                                                                                                                                                                                                                                                                                 |
| Date Submitted by the Author:   | 24-Jan-2020                                                                                                                                                                                                                                                                                                                                                                                       |
| Complete List of Authors:       | Denford, Sarah; University of Exeter, Children's Health & Exercise Research Centre, Sport and Health Sciences<br>van Beurden, Samantha; University of Exeter, Children's Health & Exercise Research Centre, Sport and Health Sciences<br>O'Halloran, Paul; La Trobe University,<br>Williams, Craig; University of Exeter, Children's Health & Exercise Research Centre, Sport and Health Sciences |
| <b>Primary Subject Heading</b>: | Respiratory medicine                                                                                                                                                                                                                                                                                                                                                                              |
| Secondary Subject Heading:      | Qualitative research, Paediatrics, Respiratory medicine                                                                                                                                                                                                                                                                                                                                           |
| Keywords:                       | QUALITATIVE RESEARCH, RESPIRATORY MEDICINE (see Thoracic Medicine), SPORTS MEDICINE, Cystic fibrosis < THORACIC MEDICINE, Paediatric thoracic medicine < PAEDIATRICS                                                                                                                                                                                                                              |
|                                 |                                                                                                                                                                                                                                                                                                                                                                                                   |

SCHOLARONE™  
Manuscripts



I, the Submitting Author has the right to grant and does grant on behalf of all authors of the Work (as defined in the below author licence), an exclusive licence and/or a non-exclusive licence for contributions from authors who are: i) UK Crown employees; ii) where BMJ has agreed a CC-BY licence shall apply, and/or iii) in accordance with the terms applicable for US Federal Government officers or employees acting as part of their official duties; on a worldwide, perpetual, irrevocable, royalty-free basis to BMJ Publishing Group Ltd ("BMJ") its licensees and where the relevant Journal is co-owned by BMJ to the co-owners of the Journal, to publish the Work in this journal and any other BMJ products and to exploit all rights, as set out in our [licence](#).

The Submitting Author accepts and understands that any supply made under these terms is made by BMJ to the Submitting Author unless you are acting as an employee on behalf of your employer or a postgraduate student of an affiliated institution which is paying any applicable article publishing charge ("APC") for Open Access articles. Where the Submitting Author wishes to make the Work available on an Open Access basis (and intends to pay the relevant APC), the terms of reuse of such Open Access shall be governed by a Creative Commons licence – details of these licences and which [Creative Commons](#) licence will apply to this Work are set out in our licence referred to above.

Other than as permitted in any relevant BMJ Author's Self Archiving Policies, I confirm this Work has not been accepted for publication elsewhere, is not being considered for publication elsewhere and does not duplicate material already published. I confirm all authors consent to publication of this Work and authorise the granting of this licence.

1  
2  
3 Barriers and facilitators to physical activity among children,  
4  
5  
6 adolescents, and young adults with cystic fibrosis: A systematic review  
7  
8  
9 and thematic synthesis of qualitative of research  
10  
11  
12  
13  
14  
15

16 Denford, S., van Beurden, SB., O'Halloran, P., Williams, CA.  
17  
18  
19  
20  
21

22 **Corresponding author:**  
23  
24

25 Sarah Denford,  
26  
27

28 Children's Health and Exercise Research Centre,  
29  
30

31 Sport and Health Sciences, University of Exeter,  
32  
33

34 St. Luke's Campus,  
35  
36

37 Heavitree Road,  
38  
39

40 Exeter, EX1 2LU, UK.  
41  
42

43 Email: [S.Denford@exeter.ac.uk](mailto:S.Denford@exeter.ac.uk)  
44  
45  
46  
47  
48

49 Samantha B van Beurden,  
50  
51

52 Children's Health and Exercise Research Centre,  
53  
54

55 Sport and Health Sciences,  
56  
57

58 University of Exeter,  
59  
60

1  
2  
3 St. Luke's Campus,  
4

5  
6 Heavitree Road,  
7

8  
9 Exeter, EX1 2LU, UK.  
10

11  
12 Email: [S.Van-Beurden@exeter.ac.uk](mailto:S.Van-Beurden@exeter.ac.uk)  
13  
14

15  
16  
17 Paul O'Halloran,  
18

19  
20 School of Psychology and Public Health,  
21

22  
23 La Trobe University,  
24

25  
26 Bundoora Victoria 3086  
27

28  
29 Email: [P.OHalloran@latrobe.edu.au](mailto:P.OHalloran@latrobe.edu.au)  
30  
31

32  
33  
34  
35 Craig A Williams,  
36

37  
38 Children's Health and Exercise Research Centre,  
39

40  
41 Sport and Health Sciences,  
42

43  
44 University of Exeter, St. Luke's Campus,  
45

46  
47 Heavitree Road,  
48

49  
50 Exeter, EX1 2LU, UK.  
51

52  
53 Email: [C.A.Williams@Exeter.ac.uk](mailto:C.A.Williams@Exeter.ac.uk)  
54  
55  
56  
57  
58  
59  
60

1  
2  
3  
4  
5  
6 **Word count: 5886**  
7  
8

9 **Key words:** Respiratory, Exercise, Self-determination theory, Intrinsic motivation, Family.  
10  
11  
12  
13  
14  
15  
16  
17  
18  
19  
20  
21  
22  
23  
24  
25  
26  
27  
28  
29  
30  
31  
32  
33  
34  
35  
36  
37  
38  
39  
40  
41  
42  
43  
44  
45  
46  
47  
48  
49  
50  
51  
52  
53  
54  
55  
56  
57  
58  
59  
60

For peer review only

## Abstract

Objectives: Physical activity is widely recommended in the treatment and management of cystic fibrosis (CF). Despite the numerous physical and psychological benefits, many young people with CF are not achieving the recommended levels of physical activity. The aim of this systematic review was to identify and synthesise available qualitative investigations exploring the motives for, barriers to and facilitators of physical activity among young people with CF.

Methods: The following six electronic databases were systematically searched: ASSIA, CINAHL, EMBASE, MEDLINE, MEDLINE-in-process, PsycINFO up to August 2019. Keywords were used to identify qualitative research that explored engagement in physical activity among young people with CF. Titles and abstracts were screened by two independent reviewers, and potentially relevant articles were retrieved in full. Articles were eligible for inclusion if they employed any qualitative method and recruited participants under the age of 24 years with CF. Risk of bias of included studies were assessed via the Critical Appraisal Skills Program. Results were synthesised using a thematic approach.

Results: Seven studies met our inclusion criteria and were included in the review. Overall, studies were of moderate to high quality. Thematic synthesis identified nine main themes that encompass motives for, barriers to and facilitators of physical activity among young people with CF. These were 1) perceptions of physical activity, 2) value attributed to physical activity, 3) social influences, 4) competing priorities, 5) fluctuating health, 6) normality, 7) control beliefs, 8) coping strategies, and 9) availability of facilities. Previous reviews have been unable to identify intervention characteristics that influence physical activity behaviour.



1  
2  
3 Conclusions: This review provides detailed information on the physical (biological – clinical),  
4  
5 psychological, social, and environmental influences on physical activity behaviour, thus  
6  
7 providing numerous targets for future interventions. This in turn could facilitate promotion  
8  
9 of physical activity among young people with CF.  
10  
11  
12

### 13 **Article summary**

#### 14 **Strengths and limitations of this study**

- 15  
16  
17 • This is the first synthesis of qualitative work that has explored barriers and  
18  
19 facilitators to physical activity among young people with CF.  
20  
21  
22 • Risk of bias were assessed independently by two authors using the Critical Appraisal  
23  
24 Skills Program (CASP) tool for qualitative and observational studies.  
25  
26  
27 • We were only able to include studies that were published in full in English, therefore  
28  
29 we may have missed potentially relevant data.  
30  
31  
32 • Three of the studies included in the review were authored by one research team,  
33  
34 this may reflect a smaller distribution of participants, potentially reducing the  
35  
36 transferability of findings.  
37  
38  
39  
40  
41  
42  
43  
44  
45  
46  
47  
48  
49  
50  
51  
52  
53  
54  
55  
56  
57  
58  
59  
60

1  
2  
3 **Declarations of conflicting interests**  
4

5  
6 The authors declare that there is no conflict of interest.  
7

8  
9 **Ethics approval and consent to participate**  
10

11  
12 Not applicable  
13

14  
15 **Consent for publication**  
16

17  
18 Not applicable  
19

20  
21 **Availability of data and material**  
22

23  
24 All data relevant to the study are included in the article or uploaded as supplementary  
25  
26 information.  
27

28  
29 **Funding**  
30

31  
32 The following work was supported by the Cystic Fibrosis Trust Strategic Research Centre:  
33  
34 grant number 008 and Vertex Pharmaceuticals Circle of Care Award. The funders had no  
35  
36 involvement in the research.  
37

38  
39 **Author contributions**  
40

41  
42 This study was designed by SD with considerable input from SvB, CW and PO. Studies were  
43  
44 identified by SD with input from colleagues with expertise in systematic reviewing. Data  
45  
46 were extracted and analysed by SD and SvB with input from PO and CW. The manuscript  
47  
48 was prepared by SD with considerable input from SvB, CW and PO. All authors approved the  
49  
50 final manuscript prior to publication.  
51  
52  
53  
54  
55  
56  
57  
58  
59  
60

## Background

Cystic fibrosis (CF) is a progressive, genetic condition affecting more than 10,400 people in the United Kingdom, and more than 70,000 worldwide [1]. Mutations in the cystic fibrosis transmembrane (CFTR) affect the regulation of salt and water movement across cell membranes, resulting in abnormally thick mucus in the lungs and digestive system [1]. This leads to bronchiectasis, inflammation, recurrent infections and eventually respiratory failure [1]. There is no cure for CF, but advances in treatment mean that people with CF have a greater life expectancy than previous generations [2]. However, treatment is demanding; comprising a complex regime of pharmacological treatments, physiotherapy and airway clearance, high calorie diets and physical activity [3].

Physical activity, inclusive of sport, exercise, and recreational activities are widely recommended in the management of CF [4] due to the beneficial impact on aerobic capacity and lung function [5, 6], as well as improvements in cardiovascular endurance [7], muscular strength [8], and mucus clearance [9]. Physical activity also has a positive impact on health-related quality of life [6], fatigue [10], and psychological wellbeing [11]. The role of physical activity in the management of CF is viewed favourably by both healthcare professionals [12, 13] and people with CF [14, 15]. Despite this, like their healthy peers, many children with CF are failing to achieve the national recommended 60 minutes of daily moderate to vigorous activity [16, 17], with levels reducing further throughout adolescence [18]. Not only does this have implications for physical health [19], it also has a detrimental impact on psychological health [6], as well as reducing opportunities for social interaction [6].

The impact of physical activity on the physical and psychological health of individuals with CF has been well established. However, in contrast to the literature regarding the benefits

1  
2  
3 of physical activity, there is a paucity of literature regarding how best to support young  
4  
5 people with CF to be more physically active. One quantitative review, of interventions for  
6  
7 promoting physical activity among individuals with CF [20], found little evidence to support  
8  
9 the effectiveness of any approach to promote physical activity. However, in order to  
10  
11 successfully change behaviour, it is necessary to identify and target determinants of the  
12  
13 behaviour in question [21]. However, the quantitative review did not consider the  
14  
15 modifiable determinants of physical activity and is therefore not able to explain what these  
16  
17 approaches were targeting (i.e., mechanisms of action) and why they may have failed to  
18  
19 promote physical activity.  
20  
21  
22  
23  
24

25  
26 A large body of literature has explored deterrents, barriers and facilitators to physical  
27  
28 activity among young people without chronic conditions [22]. Individual level (e.g.,  
29  
30 enjoyment, motivation), interpersonal (social relationships) and environmental factors (e.g.,  
31  
32 access to green space) have been highlighted as important determinants of physical activity  
33  
34 [22, 23, 24]. However, young people with CF have a unique set of circumstances, for  
35  
36 example, fluctuating health, which is likely to influence participation in physical activity. It is  
37  
38 therefore necessary to explore barriers and facilitators to physical activity among this  
39  
40 population. There is widespread agreement among intervention developers that eliciting  
41  
42 and addressing the needs and perspectives of the target audience is a critical part of  
43  
44 intervention development [25]. It is impossible for research teams to predict the needs and  
45  
46 preferences of the target audience, and so it is crucial that we elicit the views of  
47  
48 intervention recipients [26]. This will facilitate the identification of potentially modifiable  
49  
50 psychological, social, environmental and behavioural determinants of physical activity for  
51  
52 young people with CF and will inform the selection of approaches to effectively support  
53  
54 changes in physical activity for this population [27]. As qualitative methods provide in-  
55  
56  
57  
58  
59  
60

1  
2  
3 depth, rich and detailed information about a topic as experienced by target populations  
4  
5 they are well placed to explore this topic. Whilst research relating to motives, barriers and  
6  
7 facilitators of physical activity among young people with CF has been conducted [28-30], as  
8  
9 yet, no review has comprehensively and systematically synthesised this literature.  
10  
11

12  
13 The socio ecological model provides the overarching framework for this review [31]. The  
14  
15 model highlights the multiple layers of influence on the health of the population. The model  
16  
17 recognises that, in addition to personal lifestyle, the physical and social environment, and  
18  
19 wider socio-economic conditions affect population health. As interventions may operate at  
20  
21 any of these levels, the current work aims to explore the barriers and facilitators to physical  
22  
23 activity that operate at these multiple levels. Utilising this model, we explore barriers and  
24  
25 facilitators to physical activity among young people with CF.  
26  
27  
28  
29

## 30 31 **Aims**

32  
33 This systematic review aimed to identify and synthesise the qualitative literature on the  
34  
35 motives for, barriers to, and facilitators of physical activity among young people with CF.  
36  
37 Specifically, we were interested in understanding: 1) What motivates young people with CF  
38  
39 to be active; 2) What are the barriers to being physically active among young people with  
40  
41 CF; 3) What facilitates physical active among young people with CF.  
42  
43  
44  
45

## 46 47 **Methods**

48  
49 The review was conducted and reported in accordance with the Preferred Reporting Items  
50  
51 for Systematic Reviews and Meta-analyses (PRISMA) statement (Supplement 1) [32].  
52  
53  
54  
55  
56  
57  
58  
59  
60

## Search strategy

The following six electronic databases were searched: ASSIA, CINAHL, EMBASE, MEDLINE, MEDLINE-in-process, PsycINFO up to August 2019. Key word search terms included: Cystic Fibrosis; Physical activity; Exercise; Sport; Recreation (See full Search Strategy in Supplement 2). Search terms were adapted for each database. Reference lists of existing reviews were also searched. To identify any unpublished or ongoing work, key authors and experts in the field were contacted.

## Study selection

All titles and abstracts of identified records were reviewed by the lead author. A second reviewer independently reviewed 10% of records. As there were 100% agreement between the two reviewers, it was decided that it was not necessary for all records to be reviewed by a second reviewer. Potentially relevant articles were retrieved in full and all (100%) were assessed independently by both reviewers against the inclusion criteria and quality assessment (as below).

## Inclusion criteria

### *Types of studies to be included*

Any study using qualitative methods to identify motivators, barriers or facilitators to physical activity among young people with CF. We did not limit the search by date or location, but inclusion was limited to studies written in English.

### ***Participants / population***

Our population of interest were children and young people with CF under the age of 24 years. Studies including adults were also eligible for inclusion if the majority of participants fell between the relevant age bracket.

Studies including participants with multiple conditions (e.g., those studying people with chronic disease) were included as long as data provided by individuals with CF were clearly indicated.

### ***Intervention / exposure***

Any study describing motives for or barriers or facilitators to physical activity among young people with CF.

### **Exclusion criteria**

We excluded studies that: 1) did not include individuals with CF; 2) promote physical activity or exercise without consideration of barriers or facilitators; 3) are not reported in enough detail to identify barriers or facilitators to physical activity; 4) do not primarily target young people (under the age of 24); 5) are not published in English; 6) do not use qualitative methods.

### **Primary outcome**

1. Motives for physical activity participation among young people with CF.
2. Barriers to physical activity participation among young people with CF.
3. Facilitators of physical activity participation among young people with CF.

## Data extraction

Data were extracted independently by the first and second author using a data extraction template developed for this purpose. Any disagreements were resolved via discussion.

Data were extracted on:

1. Author and year and location of publication
2. Study design
3. Sample size and characteristics
4. Data collection methods
5. Method of analysis
6. Barriers and facilitators identified or targeted
7. Overall conclusions

## Risk of bias

Risk of bias were assessed independently by the first and second author using the Critical Appraisal Skills Program (CASP) tool for qualitative and observational studies [33]. Kappa statistics indicated excellent levels of agreement (>0.8). Any disagreements were resolved via discussion. The CASP is a 10-item checklist comprising questions relating to the research design, data collection and analysis, reflexivity, ethics, implications of the research. We adopted a three-point rating system as used by a number of authors [34, 35], in which a rating point from 1-3 is given to each article for each of the CASP's questions. Studies receive a score of 1 for issues that are not mentioned or poorly justified; a score of 2 for little elaboration of an issue; and a score of 3 for issues that are well justified. This results in a quality score of between 8 and 24. Those scoring less than 15 were categorised as weak. Those scoring between 16 and 23 were considered moderate, and those scoring 24 points



1  
2  
3 were considered strong. In this review, the CASP was used to describe the quality of the  
4  
5 studies for contextual purposes. No exclusions were made on the basis on CASP scores.  
6  
7

### 8 **Strategy for data synthesis**

9  
10 Data from qualitative studies were synthesised using a thematic method [36] in which  
11  
12 common themes from each study are highlighted and discussed. First, the results and  
13  
14 discussion sections of the manuscripts were read by two reviewers, and relevant data were  
15  
16 extracted and entered into Nvivo for analysis. Thematic analysis followed three stages as  
17  
18 recommended by Thomas and Harden [37]. Focusing on author's interpretations of the  
19  
20 data, the first stage involved the creation of initial codes to describe or summarise relevant  
21  
22 text. In the second and third stage, codes were organised into descriptive themes, and  
23  
24 finally into analytical themes (stage 3). We employed multiple measures to maximise  
25  
26 trustworthiness within this study. This included clear exposure of methods of data collection  
27  
28 and analysis, maintaining an audit trail of the analysis process, attention to negative cases,  
29  
30 and engaging in multiple discussions with the research team to challenge themes as they  
31  
32 develop.  
33  
34  
35  
36  
37  
38  
39  
40

### 41 **Patient and public involvement**

42  
43 A patient and public involvement group was established to inform the development and  
44  
45 direction of our research. The group met regularly (via skype) and consisted of young people  
46  
47 with cystic fibrosis, physiotherapists, technicians, and paediatricians. In the first instance,  
48  
49 the group were asked to suggest research topics and questions they would like to be  
50  
51 answered. Later, the group met to support the development of the protocol. Finally, the  
52  
53 group were very much involved in disseminating the results of the review though the  
54  
55 development and production of short animations.  
56  
57  
58  
59  
60

## Results

### Study selection

The search results (Fig. 1) identified 10,673 records, of which 2631 were duplicates. After application of the exclusion criteria, seven studies were included in the thematic analysis.

### Overview of studies

The included studies were published between 2008 and 2018. One study was conducted in Australia [38], three in Canada [39-41], two in the United States of America [42, 43], and one in the United Kingdom [44]. All studies reported the use of semi-structured interviews. One study used a multifaceted approach to data collection; also utilising focus groups, mapping, photo-elicitation and traffic light posters [38]. One study reported the use of telephone interviews [43]. Methods of analysis included interpretive phenomenology [38, 44], thematic analysis [40, 42, 43], grounded theory [41] and case study analysis [39]. The rationale for the conduct of the work was to increase understanding of physical activity among children with CF [38], promote children's participation in research [38] and to inform the development of interventions to promote physical activity [40-43].

Participants were between the ages of 4 and 18 years; although only one study included participants that were under the age of 8 years [38]. All had a confirmed diagnosis of CF, although two studies included participants with other chronic conditions; including coronary heart disease [40] asthma [38] and type one diabetes [38]. Three studies also included parents of young people with CF alongside the perspective of the young person with CF [38, 40, 42], and one study included the views of healthcare professionals [44]. Three of the included studies were written by the same lead author [40, 41]. See Table 1 for an overview of included studies.

## Risk of bias

An overview of the quality of the included studies is presented in Table 2. All seven studies were considered to be of moderate quality.

## Thematic synthesis

Thematic synthesis identified nine main themes that encompass motives for physical activity, barriers to, and facilitators of physical activity at the level of the individual, the social environment, and the built and natural environment as outlined in the socio-ecological model. These main themes were: 1) perceptions of physical activity, 2) value for physical activity, 3) social influences, 4) competing priorities, 5) fluctuating health, 6) normality, 7) control beliefs, 8) coping strategies, and 9) availability of facilities. The data provided below are quotes from the participants who had taken part in the primary studies and were reported by the authors of the included studies to illustrate their findings.

### *Perceptions of Physical activity*

Within the seven papers, positive and negative perceptions of physical activity were considered to be influential in engagement with physical activity [39, 42, 43, 44]. Positive perceptions included enjoyment, mastery, and autonomy; and appeared to be highly influenced by previous experiences of physical activity, the health of the individual, and the social environment in which physical activity was performed. A sense of “fun” and “enjoyment” appeared to be important for sustained physical activity [41, 43]; as evidenced by one participant in the study by Swisher et al who states; *“I want to exercise because I like doing the activities... they are fun... I feel good after”* (p110). Likewise, perceptions of “energy” versus “work” were influential; with individuals who report feeling “energetic” and “empowered” after activity more likely to report continued physical activity [43].

1  
2  
3 Participants who had positive perceptions of physical activity also often reported mastery  
4 experiences; mentioning the building of a sense of competence and achievement [41]. One  
5  
6 participant in the study by Moola et al [41] describes how her preferred activity (dance) *“is*  
7  
8 *really exciting. There is a lot of anticipation leading up to it. I like working hard to achieve*  
9  
10 *things”* (P52). In contrast, negative perceptions of physical activity appeared to decrease  
11  
12 motivation for physical activity. Unpleasant sensations such as discomfort, muscle soreness,  
13  
14 fatigue, joint pain and breathlessness [42, 44], and a lack of enjoyment or boredom [43]  
15  
16 were reported. As an example, one participant in the study by Shelley et al [44] dislikes the  
17  
18 way exercise *“gives you the pains the next day. Like you’re dragging your legs up the stairs*  
19  
20 *the next day”* (P340). Feelings of self-consciousness resulted in young people feeling  
21  
22 exposed and vulnerable [39], despondent [40], and anxious to avoid physical activity [40].  
23  
24 Negative perceptions of physical activity appeared to be exacerbated by CF and symptoms  
25  
26 of CF (e.g., tiredness, breathlessness) [41, 44]; as highlighted by a quote from a participant  
27  
28 in Moola et al’s [41] study: *“I know enough times from being sick and trying to run on the*  
29  
30 *treadmill... so then I say, ‘if I am going to be tired, then why do it?’”* (P54).  
31  
32  
33  
34  
35  
36  
37  
38  
39

### 40 ***Value attributed to physical activity***

41  
42  
43 Included studies presented individuals as placing high or low value on physical activity.  
44  
45 Physical activity was considered to be important for improving general health for both  
46  
47 young people with CF [42, 43] and their families [40]. It was also viewed as critical for the  
48  
49 management of CF; both in terms of preventing or delaying deterioration and in managing  
50  
51 symptoms [40, 42, 43, 44]. As an example, one participant in Swisher’s [43] study described  
52  
53 how physical activity *“helps my lungs and stuff...It helps me breathe better...it keeps me*  
54  
55 *active so I could always run around”* (P110). However, this only appeared to be the case for  
56  
57  
58  
59  
60

1  
2  
3 those who enjoyed physical activity; and found they felt better after activity. For those who  
4  
5 did not enjoy PA, the unpleasantness associated with physical activity appeared to outweigh  
6  
7 any positive associations.  
8  
9

10  
11 The role of physical activity in psychological health was not mentioned as frequently as its  
12  
13 contribution to physical health; only being noted as important in one study [43]. Despite  
14  
15 being aware of the benefits of physical activity, some young people with CF placed no value  
16  
17 on physical activity – particularly if it was perceived to be unpleasant [41]. Indeed, health  
18  
19 improvement and CF management were not sufficiently motivational for those who were  
20  
21 not active; with one participant in the study by Moola et al [41] acknowledging that:  
22  
23

24  
25 *“[physical activity] should be higher on the priority list.... But because I know that it is hard, I*  
26  
27 *do not want to make myself work hard” (P54).*  
28  
29

### 30 31 **Social influences** 32

33  
34 All studies included in the review highlighted the role of the parents /care providers in  
35  
36 influencing physical activity behaviour. Parents were described as knowledgeable about the  
37  
38 role played by physical activity in the health of their child [38, 41], and appeared to play a  
39  
40 key role in acting as strong physical activity role models [40-42]. This included providing  
41  
42 children with the skills they need to be active [42] providing tangible support [38, 44],  
43  
44 planning, structuring activities and overcoming barriers [38, 41, 42] providing opportunities  
45  
46 for physical activity, and providing encouragement and motivation [41, 42, 44]. For example,  
47  
48 one parent in Fereday’s study [38] describing a willingness to drive her daughter to a dance  
49  
50 class (an hour round trip) five nights a week because *“we are relieved she loves dancing so*  
51  
52 *much because it is something she can do all year round, it's indoors, dry and warm” (P6).*  
53  
54  
55  
56  
57  
58  
59  
60

1  
2  
3 Parental support could be detrimental to physical activity behaviour if parents were  
4  
5 sedentary [40-42] or overbearing [44]. This is demonstrated by a quote from a participant in  
6  
7 Shelley's study [44] in which the participant states "*I did a mile on the treadmill the other*  
8  
9 *day, and Dad was like, 'No, you're going to do another one... (I feel like) I'm going to slap*  
10  
11 *him. Push him off his bike. You do another mile'" (P340). Parents themselves were aware of*  
12  
13 the impact of their physical activity on their child's physical activity behaviour; although  
14  
15 often struggled to motivate themselves and their child to be active, with one parent  
16  
17 participant in Happ's study [42] reporting that "*It is hard for me to make him exercise just*  
18  
19 *because I don't, I guess" (P309).*

20  
21 The role of social comparison was strongly noted by three of the seven studies [ 40, 43, 44].  
22  
23 Interestingly, social comparison could be motivational; with young people reporting  
24  
25 increased efforts to ensure that they were able to "keep up" with their peers [44]. For  
26  
27 example, one participant in Shelley's study [44] describes how "*When I can do what my*  
28  
29 *mates are doing I just feel better, because I know that it doesn't show that it's affecting me,*  
30  
31 *and I can keep up with my mates and just do all the exercise" (P340). In contrast, not being*  
32  
33 able to keep up with peers [40] and / or needing to take regular breaks [40] could lead to  
34  
35 embarrassment [43], anger and frustration [44]; making adolescents 'stand out' – something  
36  
37 they are appear motivated to avoid [43]. This was exacerbated by negative comments or  
38  
39 treatment by others; including teachers and coaches [38, 40]. Indeed, one participant in  
40  
41 Moola's study [41] describes feeling that CF precludes him from sport:  
42  
43 "*I feel small, I feel skinny. I do not feel like I fit in with other kids... and they think that I am*  
44  
45 *bad and that I have some disease . . . they talk rudely about me to themselves . . . if it (sports*  
46  
47 *programs) is for kids that are not sick—there is no point in going. It is all healthy kids, and*  
48  
49 *they are active, and it is a place for them" (P55).*

1  
2  
3 Four of the seven studies reported a beneficial effect of positive friendship groups on  
4 physical activity behaviour [38, 40, 41, 44]; either through providing support [38, 39], or  
5 making activity more enjoyable [41, 44]. One study reported how participation in physical  
6 activity could even extend the young persons' social group [38]; with participants describing  
7 how they had made friends through various activities. Shelley et al [44] present a quote  
8 from a young person with CF who uses humour when her CF prevents her from being as  
9 active as her friends:

10  
11  
12  
13  
14  
15  
16  
17  
18  
19  
20  
21 *"Like one of us wins a race or wins a game or something, I can go, 'Oh yes, well, I've got CF',*  
22 *and then it's like pulling a CF card...I just find it funny, because they're like, 'aaaaaah! She's*  
23 *done it again'...we have a laugh about it...."* (P370).

### 24 25 26 27 28 ***Competing priorities***

29  
30  
31 Of the seven included studies, a lack of time for physical activity due to competing priorities  
32 was mentioned in three [40-42]. Busy schedules were reported as a barrier, particularly  
33 when taking into account an already burdensome treatment regime [42]. Participants in the  
34 study by Moola et al [41] described how physiotherapy "robbed them of time" that would  
35 otherwise have been used for physical activity; *"I know that I need to do physical activity,*  
36 *but it is just sometimes hard when things interfere, like medicine or PEP"* (P556).

37  
38  
39 For others, limited time prohibited physical activity because they would rather spend the  
40 time doing something meaningful and enjoyable for them (such as seeing friends) [41]. As a  
41 lack of time due to treatment, one study described how participants alluded to a lack of  
42 time in a symbolic sense [41]. Within this study, participants presented concerns that "time  
43 was running out" due to a shortened lifespan. This increased the pressure to achieve  
44  
45  
46  
47  
48  
49  
50  
51  
52  
53  
54  
55  
56  
57  
58  
59  
60

1  
2  
3 significant milestones (e.g., attaining a career, getting married etc) within a shortened  
4  
5  
6 lifespan [41].  
7

### 8 ***Fluctuating health***

9  
10  
11 Ill health could prevent physical activity either through illness exacerbations, or  
12  
13 exacerbations of symptoms [38, 39, 41, 43, 44]. Indeed, serious or disruptive events such as  
14  
15 hospitalisation and infections could deter even the most motivated of people [38, 39]; with  
16  
17 a participant in Moola et al's study [41] describing how draining physical activity can be  
18  
19 when sick: *"when I am really sick, I even find brushing my teeth difficult"* (P54).  
20  
21  
22

23  
24 Symptoms, such as breathlessness, fatigue, and coughing exacerbated the perceived  
25  
26 unpleasantness associated with physical activity; leading to avoidance of activity whenever  
27  
28 possible [40, 43, 44]. In contrast, relative "wellness" appeared to inspire some to be more  
29  
30 active [39], with one participant from Shelley's study [44] describing that he is active  
31  
32 because: *"I am generally quite well, I can do it... I tend to have quite a high lung function,*  
33  
34 *and I don't really get ill a lot..."* (P340). Depression, although not a strong theme, was an  
35  
36 issue raised in two studies [39, 41] as potentially having a detrimental impact on physical  
37  
38 activity. In particular, Moola et al [39] presents a quote from a participant describing how  
39  
40 her decline in activity signifies a decline in her health:  
41  
42  
43  
44

45  
46  
47 *"I also know that I am not going to live as long as everybody else so that is hard. I feel like it*  
48  
49 *is out of my control, I feel helpless, how I used to be able to do it (physical activity), and now*  
50  
51 *I can't. It is kind of depressing. It makes me think that it is a progressive disease, and it make*  
52  
53 *me think that it is getting worse . . . it makes me worried"* (P55).  
54  
55  
56  
57  
58  
59  
60



## **Normality**

The concept of normality was highlighted in three of the seven studies [40, 41, 44].

Normality appeared to be both a motive for physical activity [39], as well as a barrier to physical activity [39, 40]. For some, physical activity was used to provide an opportunity for the young people to feel normal. It provided a window within which they considered themselves to be 'just like everyone else' [44]. Physical activity appeared to minimise differences between themselves and those without CF. For example, Shelley et al [44] present a quote from one participant who states: *"It's like you're just doing it because you can, and you want to. You kind of feel the same as everyone else for an hour and a half"* (P6).

Interestingly, whilst some were of the opinion that physical activity was something that everyone, with or without chronic conditions, should be doing to improve their health [44], others felt that having CF meant that they had to take part in physical activity whilst their friends (without CF) did not [39]. Participants who felt they were in some way not normal were also more likely to report feeling self-conscious [39, 40]. Indeed, physical activity appeared to accentuate the extent to which some young people felt thin, or body conscious, or "not good at sport" compared with their peers [39, 40]. One parent participant in Moola et al's study [40] describes how her son: *"wonders if he is different... He avoids team sports where you need a big size... but he does care"* (P606).

## **Control beliefs**

Individual differences in perceptions relating their ability to control or manage their condition appeared to influence participants' use of active or passive coping strategies.

Whilst CF is a chronic condition that cannot be cured, individuals varied in the extent to

1  
2  
3 which they viewed CF as something that could be controlled and managed. Those who  
4  
5 adopted a fatalistic approach; i.e., were of the opinion that there was nothing that they  
6  
7 could do to *cure* CF, were less motivated to adopt positive self-care behaviours such as  
8  
9 physical activity [39, 41]. For example, one participant in Moola et al's study [39] describes  
10  
11 how her inability to cure her CF makes her unwilling to adopt certain self-care behaviours:  
12  
13

14  
15  
16 *"If there was something that would get rid of CF, I would do it all the time [laughing]! It is*  
17  
18 *not like that.... It's like 'I have to do this for the rest of my life? Screw it! Who cares! I am not*  
19  
20 *going to do it anymore" (P36).*  
21  
22

23  
24 In contrast, a second group of participants were of the opinion that they were in control of  
25  
26 their CF, and reported that having CF did not need to stop them or prevent them from doing  
27  
28 anything [38, 41, 44], provided they put their minds to it. In particular, one participant in  
29  
30 Shelley's study [44] states that: *"I know just because I've got CF doesn't mean I can't do it"*  
31  
32 *(P340).*  
33  
34

### 35 36 ***Coping Strategies*** 37

38  
39 Strategies for overcoming barriers to physical activity included both functional and  
40  
41 dysfunctional coping strategies. Studies discussed how participants had integrated  
42  
43 strategies for dealing with symptoms, such as slowing down, or resting when necessary [38].  
44  
45 To deal with structural barriers, people with CF [38, 40] and their parents [38] had a variety  
46  
47 of strategies; often involving elaborate planning [38]. For those who were self-conscious of  
48  
49 symptoms reported tactics such as avoiding physical activity in public places [40]. One  
50  
51 participant in the study by Fereday et al [38] describes a strategy of reducing the intensity of  
52  
53 the activity or resting whenever necessary: *"He coped and he kept wanting to play but he*  
54  
55 *really needed a break. After resting a couple of minutes he is as good as gold" (P8).*  
56  
57  
58  
59  
60

1  
2  
3 Others had strategies for dealing with difficult emotions [40], such as fear and anxiety [41].

4  
5 In particular, Moola et al [41] present a quote from a participant describing how positive  
6  
7 self-talk prevents them from giving up: *“When it is talked about it is a different issue... I tell  
8  
9 myself ‘that’s not true. You can do it – it is going to be harder, but you can still do it’” (P32).*

10  
11  
12  
13 However, for some, avoidance of physical activity was the preferred method of coping with  
14  
15 any embarrassment [40]. Indeed, one participant in Moola et al’s [40] study describes how  
16  
17 the embarrassment prevents her from taking part in certain activities: *“You can see my ribs  
18  
19 and I do not want to wear a two piece bathing suit or go swimming” (P605).*

### 22 23 **Facilities and opportunities**

24  
25  
26 Finally, availability of facilities was considered to have an impact on physical activity  
27  
28 behaviour [42, 44]. Good access to local community facilities (e.g., swimming pools, sports  
29  
30 centres) and private clubs were reported to increase physical activity among young people  
31  
32 with CF [44]. Having the opportunity to walk to school was also considered to promote  
33  
34 autonomy for physical activity [44]. In contrast, lack of access to “different” facilities, or  
35  
36 opportunities to try new and exciting activities were mentioned as barriers to physical  
37  
38 activity [44]. The emphasis here appeared to be not on the availability per se, but on the  
39  
40 availability of facilities that were not considered to be boring; for example, one participant  
41  
42 in Shelley’s study [44] described a limited range of facilities for different sports: *“A few more  
43  
44 different clubs that do different sports that are around, because there isn’t many” (P340).*

45  
46  
47 However, facilities and opportunities for physical activity appeared to be influenced by  
48  
49 seasonal variation; with more young people reportedly being more active in the summer  
50  
51 months [42].  
52  
53  
54  
55  
56  
57  
58  
59  
60

## Discussion

The aim of this systematic review was to examine and synthesise the qualitative literature on the barriers of and facilitators to physical activity among young people with CF. In contrast to previous reviews, the current review used systematic methods to identify and retrieve all relevant research. In accordance with the social-ecological model, our analysis highlights multiple and interacting influences on physical activity behaviour at the level of the individual, and the social and physical environment in which physical activity occurs. The value and importance placed on physical activity by the young people, as well as well as perceptions of normality, control, and coping strategies utilised by young people all appeared to be influenced by the social and physical environment in which they lived and performed activity.

As well as barriers and facilitators to physical activity that are specific to young people with chronic conditions, we also identified barriers and facilitators that are often cited in the literature in relation to young people without chronic conditions. In accordance with previous research [23, 24] highly valuing and/or enjoying physical activity, and having an active family or social group were identified as having a key role in facilitating physical activity. Likewise, a low value for physical activity, lack of enjoyment of physical activity, and sedentary or overbearing families have all been shown to negatively influence participation in physical activity. However, within this review, we were also able to identify key barriers and facilitators that are specific to young people with CF. Having relatively stable health- or the perception that CF does not need to prevent physical activity, and using physical activity as a vehicle to normality, appeared to facilitate engagement with physical activity. In contrast, fluctuating health status increased the potential for negative perceptions of

1  
2  
3 physical activity, low perception of control over CF, and use of passive coping strategies  
4  
5 appeared to hinder engagement in physical activity. Whilst the presence of competing  
6  
7 priorities is not limited to those with CF, this theme appeared to be particularly significant  
8  
9 for this population; largely due to a very time-consuming treatment regime combined with  
10  
11 time pressures faced by those with a reduced life expectancy. Systematic reviews have  
12  
13 shown that beliefs relating to the extent to which conditions (and associated symptoms) can  
14  
15 be cured or control influence behaviour among multiple populations [45] including  
16  
17 individuals with CF [46, 47]. The current review provides evidence to show that such beliefs  
18  
19 are also influential in physical activity CF behaviour. CF cannot be cured, and this at times  
20  
21 led to reports of despondency and feelings of hopelessness. In these circumstances,  
22  
23 engagement in physical activity was viewed as “pointless” given that it could not cure the  
24  
25 condition. Beliefs relating to the controllability of symptoms during physical activity could  
26  
27 also lead to avoidance of physical activity. In contrast, individuals who felt in control of their  
28  
29 CF and able to prevent or manage their symptoms – even during activity – were more likely  
30  
31 to have reported developing strategies to enable them to be active. These findings indicate  
32  
33 that identifying and modifying beliefs about the controllability of CF may facilitate attempts  
34  
35 to promote physical activity.  
36  
37  
38  
39  
40  
41  
42  
43  
44

45 The concept of “normality” is often used to explain the extent to which people adapt to or  
46  
47 accept life with a chronic condition [48-50]. The term is most frequently used to describe  
48  
49 the process of adjustment following a diagnosis of a chronic condition (e.g., cancer) [48],  
50  
51 and numerous typologies of normality have been proposed [51, 52]. For example,  
52  
53 individuals may develop a “normality” in which the condition is integrated and accepted  
54  
55 [51]. At the other end of the spectrum, individuals accept a disrupted normality in which  
56  
57 maintaining a normal life is rejected due to the overwhelming disruptions caused by the  
58  
59  
60

1  
2  
3 condition. Situated between these extremes are a group of individuals who strive to present  
4 a “normal life” despite the severity of symptoms or disruption [49]. Whilst this literature is  
5 usually referring to individuals with a biographical disruption [51], the concept of normality  
6 still appears to be relevant to individuals with CF. The seven studies included in this review  
7 provide examples of individuals for whom normality includes their CF. Such individuals were  
8 able to partake in physical activity through adaptations when necessary (e.g., resting, or  
9 slowing the pace of the activity). There were also examples of individuals who, in an attempt  
10 to appear normal, would avoid activity due to its potential to accentuate differences  
11 between the young person with CF and their peers. However, within the current review  
12 there were a group of individuals who used physical activity as a way of enabling normality;  
13 engaging in physical activity because it made them feel normal. Whilst this review has  
14 highlighted the influence of perceptions of normality in physical activity behaviour, further  
15 exploration of this concept in relation to individuals with CF is clearly needed.

16  
17  
18  
19  
20  
21  
22  
23  
24  
25  
26  
27  
28  
29  
30  
31  
32  
33  
34  
35 A key barrier to physical activity identified through this review was that of competing  
36 priorities. Young people with CF described reduced time for enjoyable activities as a result  
37 of a demanding treatment regime. This combined with an increased sense of urgency for  
38 spending time with friends and family and achieving key milestones as a result of a reduced  
39 life expectancy resulted in less enjoyable pursuits (such as physical activity) being  
40 overlooked. Promotion of physical activity as an enjoyable and social pastime could reduce  
41 the tension associated with these competing demands.

42  
43  
44  
45  
46  
47  
48  
49  
50  
51  
52  
53 Perceiving physical activity as fun, enjoyable, and enhancing autonomy appeared to be  
54 more important for long term engagement in physical activity, than the associated health  
55 benefits. This is consistent with self-determination theory [53]; which suggests that  
56  
57  
58  
59  
60

1  
2  
3 motivation for a particular activity can be either intrinsic or extrinsic. Intrinsic motivation  
4  
5 describes engagement in activities for the pleasure or satisfaction it provides. Extrinsic  
6  
7 motivation, in contrast, describes motivation for activities for an external outcome; for  
8  
9 example, avoiding ill health, or pressure from healthcare professionals. Whilst intrinsic  
10  
11 motivation is the most autonomous form of motivation, extrinsic motivation may be more  
12  
13 or less autonomous. Motivation that is not autonomous is less likely to be sustained over  
14  
15 time [54]. Self-determination theory has informed the development of a multitude of  
16  
17 successful interventions aiming to promote physical activity among a wide range of  
18  
19 populations [55-57], and the current research highlights that use of this theory in informing  
20  
21 interventions to support physical activity among individuals with CF may also be beneficial.  
22  
23 In accordance with the social-ecological model, the role of the social and physical  
24  
25 environment were identified as key influencers in the physical activity of young people. The  
26  
27 role of the family in influencing perceptions of physical activity and physical activity  
28  
29 behaviour among young people is widely accepted [58]. Studies included in the present  
30  
31 review provide additional support for the role of the family in acting as role models and  
32  
33 providing tangible and emotional support to promote and maintain physical activity.  
34  
35 However, in order to support young people to be active, families must have the necessary  
36  
37 knowledge regarding the importance of physical activity, in addition to knowing how to  
38  
39 support young people to be active. They must also have the physical and psychological  
40  
41 capacity to be able to support young people to be active; and this could be a challenge when  
42  
43 taking into consideration the stress and emotional consequences of having a young child  
44  
45 with a chronic condition. Indeed, some parents reported using physical activity to manage  
46  
47 their own stress and anxiety. This strongly supports a strategy that involving families in  
48  
49 attempts to promote physical activity among young people with CF is critical.  
50  
51  
52  
53  
54  
55  
56  
57  
58  
59  
60

1  
2  
3 Environmental factors; including access to social facilities and safe spaces have been  
4  
5 identified as key influencers in physical activity behaviour [24]. Congruent with previous  
6  
7 research, the current review identified a lack of facilities as a key barrier to physical activity.  
8  
9  
10 However, active travel, particularly when young people were able to do this independently  
11  
12 were identified as facilitators to physical activity [22]. A focus on facilitating and supporting  
13  
14 active travel may be beneficial.  
15  
16

### 17 18 **Strengths and limitations** 19

20  
21 The main strength of this work is that it brings together the qualitative literature that has  
22  
23 provided an in-depth account of the barriers and facilitators to physical activity among  
24  
25 young people with CF. To our knowledge, this is the first systematic review and meta-  
26  
27 synthesis to do so for this population. Through synthesising this work, we have presented  
28  
29 barriers and facilitators to physical activity among a wider sample of young people with CF  
30  
31 than could be obtained through individual qualitative studies alone, and with greater depth  
32  
33 than can be obtained through quantitative studies.  
34  
35  
36

37  
38 It must be noted that the perspective brought to the analysis is psychological. Interpretation  
39  
40 of the data in relation to Self Determination Theory may have been influenced by prior  
41  
42 exposure to these theories. We acknowledge that consideration of other theories may have  
43  
44 resulted in the data being organised and presented differently. However, every effort was  
45  
46 made to ensure that all themes were clearly representative of the data as presented in the  
47  
48 original studies.  
49  
50  
51

52  
53 Sixteen potentially relevant studies were only reported in abstract format. Although we  
54  
55 contacted authors to request full unpublished reports where available, none had plans to  
56  
57 develop manuscripts of their work in time for the work to be included in this review. Whilst  
58  
59  
60



1  
2  
3 the included studies were of moderate to high quality, reflexivity was often poorly  
4  
5 described. Future studies should provide greater detail about the relationship between the  
6  
7 researcher and the research process. As three of the studies included in the review were  
8  
9 authored by one research team, this may reflect a smaller distribution of participants,  
10  
11 potentially reducing the transferability of findings.  
12  
13

14  
15 We acknowledge that barriers and facilitators to physical activity are likely to be influenced  
16  
17 by demographic factors (age, gender, location) and current levels of physical activity. The  
18  
19 primary research included in the current review did not attempt to explore variations  
20  
21 between these populations, therefore we were limited in our ability to explore these issues  
22  
23 in the current analysis. For example, only one study required participants to monitor or  
24  
25 report their physical activity levels, and this study did not link activity levels to the quotes  
26  
27 provided.  
28  
29  
30  
31

### 32 33 **Implications for research and practice** 34

35  
36 This review provides further support for the idea that individuals with CF are likely to  
37  
38 engage with activities that are fun and enjoyable rather than focusing exclusively on the  
39  
40 health benefits of physical activity. In order to promote long-term, sustainable engagement  
41  
42 with physical activity, healthcare professionals should encourage and support young people  
43  
44 to identify activities that they find enjoyable, rather than focusing exclusively on the health  
45  
46 benefits associated with physical activity. Involving families in the process could also be  
47  
48 beneficial; as families are able to provide tangible and emotional support, as well as dealing  
49  
50 with organisational demands. However, this review also identified a range of psychosocial  
51  
52 issues, such as stress and poor coping skills that may hinder physical activity among young  
53  
54 people and their families. Engagement in physical activity is likely to increase if healthcare  
55  
56  
57  
58  
59  
60

1  
2  
3 professionals can facilitate a supportive environment in which physical activity can occur.

4  
5 This could necessitate dealing with psychological issues (e.g., stress or coping skills) before  
6  
7 attempting to promote physical activity.  
8  
9

10  
11 The number of potentially relevant articles identified through our search strategy implies  
12  
13 that promotion of physical activity is an important topic and of interest to clinical care  
14  
15 teams. We had to reject sixteen potentially relevant documents as they were only available  
16  
17 in abstract form. Developing methods for sharing or disseminating these data would be  
18  
19 beneficial as it would ensure that researchers do not duplicate work that has already been  
20  
21 completed and would also allow completed work to be included in systematic reviews or  
22  
23 synthesis so that they may be used to inform clinical practice.  
24  
25  
26  
27

## 28 **Conclusions**

29  
30  
31 In summary, this is the first synthesis of qualitative work that has explored barriers and  
32  
33 facilitators to physical activity among young people with CF. Previous reviews have been  
34  
35 unable to identify intervention characteristics that influence physical activity behaviour. It is  
36  
37 therefore unclear how best to support physical activity among this population. This review  
38  
39 provides detailed information on the physical, psychological and social influences of physical  
40  
41 activity behaviour, thus providing numerous targets for future interventions. Identifying and  
42  
43 targeting issues at any of these levels could facilitate promotion of physical activity among  
44  
45 this population. Our key recommendation would be that healthcare professionals work with their  
46  
47 patients to identify barriers and facilitators to physical activity that are specific to each individual.  
48  
49 We suggest that the findings from this review may provide a framework that healthcare  
50  
51 practitioners may use to structure discussions relating to physical activity, and could potentially  
52  
53 highlight some barriers (or facilitators) that may not previously have been considered.  
54  
55  
56  
57  
58  
59  
60

1  
2  
3  
4  
5  
6  
7  
8  
9  
10  
11  
12  
13  
14  
15  
16  
17  
18  
19  
20  
21  
22  
23  
24  
25  
26  
27  
28  
29  
30  
31  
32  
33  
34  
35  
36  
37  
38  
39  
40  
41  
42  
43  
44  
45  
46  
47  
48  
49  
50  
51  
52  
53  
54  
55  
56  
57  
58  
59  
60

For peer review only

## References

1. The Cystic Fibrosis Foundation. About Cystic Fibrosis. 2017. Available from <https://www.cff.org/What-is-CF/About-Cystic-Fibrosis/>
2. The Cystic Fibrosis Trust. UK Cystic Fibrosis Registry 2016 Annual Data Report. London. The Cystic Fibrosis Trust; 2017.
3. The Cystic Fibrosis Trust. Cystic Fibrosis Insight Survey - Report on the 2017 and 2018 surveys. London. The Cystic Fibrosis Trust; 2018.
4. The Cystic Fibrosis Trust. Standards of care and good clinical practice for the physiotherapy management of cystic fibrosis. Third edition. London, The Cystic Fibrosis Trust; 2017.
5. Pianosi, P., Leblanc, J., and Almudevar, A. Peak oxygen uptake and mortality in children with cystic fibrosis. *Thorax*, 2005. **60**(1): p. 50-4.
6. Radtke, T., Nolan, S., Hebestreit, H., and Kriemler, S. Physical exercise training for cystic fibrosis. *Cochrane Database of Systematic Reviews*, 2017. **11**: p. CD002768.
7. Gulmans, V.A., de Meer, K., Brackel, H.J., Faber, J.A., Berger, R., Helders, P.J. Outpatient exercise training in children with cystic fibrosis: physiological effects, perceived competence, and acceptability. *Pediatric Pulmonology*, 1999. **28**(1): p. 39-46.
8. Orenstein, D.M., Hovell, M.F., Mulvihill, M., Keating, K.K., Hofstetter, C.R., Kelsey, S., Morris, K., Nixon, P.A. Strength vs aerobic training in children with cystic fibrosis: a randomised controlled trial. *Chest*, 2004. **126**(4): p. 1204-14.

- 1  
2  
3 9. Barak, A., Wexler, I.D., Efrati, O., Bentur, L., Augarten, A., Mussaffi, H., Avital, A.,  
4  
5 Rivlin, J., Aviram, M., Yahav, Y., Kerem, E. Trampoline use as physiotherapy for  
6  
7 cystic fibrosis patients. *Pediatric Pulmonology*, 2005. **39**(1): p. 70-3.  
8  
9
- 10  
11 10. Orava, C., Fitzgerald, J., Figliomeni, S., Lam, D., Naccarato, A., Szego, E., Yoshida,  
12  
13 K., Fox, P., Sykes, J., Wu, K. Relationship between Physical Activity and Fatigue in  
14  
15 Adults with Cystic Fibrosis. *Physiotherapy Canada*, 2018. **70**(1): p. 42-48.  
16  
17
- 18  
19 11. Backstrom-Eriksson, L., Bergsten-Brucefors, A., Hjelte, L., Melin, B., Sorjonen, K.  
20  
21 Associations between genetics, medical status, physical exercise and  
22  
23 psychological well-being in adults with cystic fibrosis. *BMJ open respiratory*  
24  
25 research, 2016. **3**(1): p. e000141.  
26  
27
- 28  
29 12. Denford S; MackIntosh K; McNarry M, Barker, A., Williams C, Promotion of  
30  
31 physical activity for adolescents with cystic fibrosis: A qualitative study of UK  
32  
33 multi-disciplinary cystic fibrosis teams. *Physiotherapy* 2019.  
34  
35
- 36  
37 13. Stevens, D., et al., Oades, P., Armstrong, N., Williams, C. A survey of exercise  
38  
39 testing and training in UK cystic fibrosis clinics. *Journal of Cystic Fibrosis*, 2010.  
40  
41 **9**(5): p. 302-6.  
42  
43
- 44  
45 14. Rowbotham, N. Question CF: A James Lind Alliance Priority Setting Partnership in  
46  
47 cystic fibrosis. *Journal of Cystic Fibrosis*, 2017. **16**(Supplement 1): p. S38.  
48  
49
- 50  
51 15. Rowbotham, N., Smith, S., Leighton, P.A., Raynor, O.C., Gathercole, K., Elliot, Z.C.,  
52  
53 Nash, E.F., Daniels, T., Duff, A.J.A., Collins, S, Chandran, S., People, U., Hurley,  
54  
55 M.N., Brownlee, K., Smyth, A. The top 10 research priorities in cystic fibrosis  
56  
57 developed by a partnership between people with CF and healthcare providers.  
58  
59 *Thorax*, 2018. **73**(4): p. 388-390.  
60

- 1  
2  
3 16. Nixon, P.A., D.M. Orenstein, and S.F. Kelsey, Habitual physical activity in children  
4 and adolescents with cystic fibrosis. *Medicine and Science in Sports and Exercise*,  
5  
6 2001. **33**(1): p. 30-35.  
7  
8  
9
- 10  
11 17. Guthold, R., Stevens, G.A., Riley, L.M., Bull, F.C. Worldwide trends in insufficient  
12 physical activity from 2001 to 2016: a pooled analysis of 358 population-based  
13 surveys with 1.9 million participants. *The Lancet Global Health*, 2018. **6**(10).  
14  
15  
16  
17
- 18  
19 18. Selvadurai, H.C., Blimkie, C.J., Cooper, P.J., Mellis, C.M., Van Asperen, P.P. Gender  
20 differences in habitual activity in children with cystic fibrosis. *Archives of Disease  
21 in Childhood*, 2004. **89**(10): p. 928-33.  
22  
23  
24  
25
- 26  
27 19. Nixon, P.A., Orenstein, D.M., Kelsey, S.F., Doershuk, C.F. The Prognostic Value of  
28 Exercise Testing in Patients with Cystic-Fibrosis. *New England Journal of  
29 Medicine*, 1992. **327**(25): p. 1785-1788.  
30  
31  
32  
33
- 34  
35 20. Cox, N.S., Alison, J.A., Holland, A.E. Interventions to promote physical activity in  
36 people with cystic fibrosis. *Paediatric Respiratory Reviews*, 2014. **15**(3): p. 237-9.  
37  
38  
39
- 40  
41 21. Craig, P., Petticrew, M. Developing and evaluating complex interventions:  
42 Reflections on the 2008 MRC guidance. *International Journal of Nursing Studies*,  
43 2013. **50**(5): p. 585-592.  
44  
45  
46  
47
- 48  
49 22. Condello, G., Puggina, A., Aleksovskaja, K. et al. Behavioral determinants of  
50 physical activity across the life course: a “DEterminants of Diet and Physical  
51 ACTivity” (DEDIPAC) umbrella systematic literature review. *Int J Behav Nutr Phys  
52 Act* 14, 58 (2017) doi:10.1186/s12966-017-0510-2  
53  
54  
55  
56  
57  
58  
59  
60

- 1  
2  
3 23. Allender, S., Cowburn, G., & Foster, C. Understanding participation in sport and  
4  
5 physical activity among children and adults: a review of qualitative studies.  
6  
7 Health education research. 2006. **21**(6), 826-835.  
8  
9  
10  
11 24. Martins, J., Marques, A., Sarmiento, H., & Carreiro da Costa, F. Adolescents'  
12  
13 perspectives on the barriers and facilitators of physical activity: a systematic  
14  
15 review of qualitative studies. Health education research. 2015. **30**(5), 742-755  
16  
17  
18  
19 25. Moore, G. F., Audrey, S., Barker, M., Bond, L., Bonell, C., Hardeman, W., ... &  
20  
21 Baird, J. Process evaluation of complex interventions: Medical Research Council  
22  
23 guidance. BMJ, 2015. **350**, h1258  
24  
25  
26  
27 26. Yardley L, Morrison L, Bradbury K, Muller I. The person-based approach to  
28  
29 intervention development: application to digital health-related behaviour change  
30  
31 interventions. J Med Internet Res. 2015. **17**(1):e30.  
32  
33  
34  
35 27. Michie, S., Johnston, M., Francis, J., Hardeman, W., Eccles, M. From Theory to  
36  
37 Intervention: Mapping Theoretical Derived Behavioural Determinants to  
38  
39 Behaviour Change Techniques. Applied Psychology, 2008. **57**(4): p. 660-680.  
40  
41  
42  
43 28. Prasad, S.A., & Cerny, F.J. Factors that influence adherence to exercise and their  
44  
45 effectiveness: application to cystic fibrosis. Pediatr Pulmonol, 2002. **34**(1): p. 66-  
46  
47 72.  
48  
49  
50  
51 29. Moran, F. and J. Bradley, Incorporating exercise into the routine care of  
52  
53 individuals with cystic fibrosis: is the time right? Expert Rev Respir Med, 2010.  
54  
55 **4**(2): p. 139-42.  
56  
57  
58  
59  
60

- 1  
2  
3  
4  
5  
6  
7  
8  
9  
10  
11  
12  
13  
14  
15  
16  
17  
18  
19  
20  
21  
22  
23  
24  
25  
26  
27  
28  
29  
30  
31  
32  
33  
34  
35  
36  
37  
38  
39  
40  
41  
42  
43  
44  
45  
46  
47  
48  
49  
50  
51  
52  
53  
54  
55  
56  
57  
58  
59  
60
30. Rand, S.P., & Prasad, S.A. Exercise as part of a cystic fibrosis therapeutic routine. *Expert Review of Respiratory Medicine*, 2012. **6**(3): p. 341-51.
31. Sallis, J., & Owen, N. (2015). Ecological models of health behavior. In K. Glanz, B. Rimer, & 724 K. Viswanath (Eds.), *Health behavior. Theory, research and practice* (5th ed., pp. 43-725 64). CA, USA: Joessey-Bass
32. Moher, D., Liberati, A., Tetzlaff, J., Douglas, G., Altman, D.S. Preferred reporting items for systematic reviews and meta-analyses: The PRISMA statement. *Annals of Internal Medicine*, 2009. **151**(4): p. 264-269.
33. Critical Appraisal Skills Programme: Making sense of evidence; 1993. Available from <https://casp-uk.net/>
34. Moolchaem, P., Liamputtong, P., O'Halloran, P., Muhamad, R. The Lived Experience of Transgender Persons: A Meta-Synthesis. *Journal of Gay & Lesbian Social Services*, 2015. **27**(2): p. 143-171.
35. Duggleby, W., Holtslander, L., Kylma, J., Hammond, C., Williams, A. Meta-synthesis of the Hope Experience of Family Caregivers of Persons With Chronic Illness. *Qualitative Health Research*, 2010. **20**(2): p. 148-58.
36. Barnett-Page, E., & Thomas, J. Methods for the synthesis of qualitative research: a critical review. *BMC medical research methodology*, 2009. **9**(1): p. 1.
37. Thomas, J., & Harden, A. Methods for the thematic synthesis of qualitative research in systematic reviews. *BMC Medical Research Methodology*, 2008. **8**(45).



- 1  
2  
3  
4  
5  
6  
7  
8  
9  
10  
11  
12  
13  
14  
15  
16  
17  
18  
19  
20  
21  
22  
23  
24  
25  
26  
27  
28  
29  
30  
31  
32  
33  
34  
35  
36  
37  
38  
39  
40  
41  
42  
43  
44  
45  
46  
47  
48  
49  
50  
51  
52  
53  
54  
55  
56  
57  
58  
59  
60
38. Fereday, J., macDougal, C., Spizzo, M., Darbyshire, P., Schiller, W. "There's nothing I can't do--I just put my mind to anything and I can do it": a qualitative analysis of how children with chronic disease and their parents account for and manage physical activity. *BMC Pediatrics*, 2009. **9**: p. 1.
  39. Moola, F.J., & Faulkner, G.E. 'A tale of two cases:' the health, illness, and physical activity stories of two children living with cystic fibrosis. *Clinical Child Psychology & Psychiatry*, 2014. **19**(1): p. 24-42.
  40. Moola, F.J., Faulkner, G.R., Kirsh, J.A., Schneiderman, J. Developing physical activity interventions for youth with cystic fibrosis and congenital heart disease: Learning from their parents. *Psychology of Sport and Exercise*, 2011. **12**(6): p. 599-608.
  41. Moola, F.J., Faulkner, G.E., Schneiderman, J.E. "No time to play": perceptions toward physical activity in youth with cystic fibrosis. *Adapted Physical Activity Quarterly*, 2012. **29**(1): p. 44-62.
  42. Happ, M.B., Hoffman, L.A., Higgins, L.W., Divirgilio, D., Orenstein, D.M. Parent and child perceptions of a self-regulated, home-based exercise program for children with cystic fibrosis. *Nursing Research*, 2013. **62**(5): p. 305-314.
  43. Swisher, A.K., & Erickson, M. Perceptions of physical activity in a group of adolescents with cystic fibrosis. *Cardiopulmonary Physical Therapy Journal*, 2008. **19**(4): p. 107-13.
  44. Shelley, J., Fairclough, S.J., Knowles, Z.R., Southern, K.W., McCormack, P., Dawson, E.A., Graves, L.E.F., Hanlon, C. A formative study exploring perceptions

- 1  
2  
3 of physical activity monitoring among children and young people with cystic  
4  
5 fibrosis and health care professionals. *BMC Pediatrics*, 2018. **18**: p. 335.  
6  
7  
8  
9 45. Hagger, M., & Orbell, M. A Meta-Analytic Review of the Common-Sense Model of  
10  
11 Illness Representations. *Psychology & Health*, 2003. **18**(2): p. 141-184.  
12  
13  
14 46. Sylvain, C., Iamothe, L., Berthiaume, Y., Rabasa-Lhoret, R. How patients'  
15  
16 representations of cystic fibrosis-related diabetes inform their health behaviours.  
17  
18 *Psychology & Health*, 2016. **31**(10): p. 1129-1144.  
19  
20  
21 47. Bucks, R.S., Hawkins, K., Skinner, T.C., Horn, S., Seddon, P., Horne, R. Adherence  
22  
23 to treatment in adolescents with cystic fibrosis: The role of illness perceptions  
24  
25 and treatment beliefs. *Journal of Pediatric Psychology*, 2009. **34**(8): p. 893-902.  
26  
27  
28  
29 48. Bury, M. Chronic illness as a biographical disruption. *Sociology of Health and*  
30  
31 *Illness*, 1982. **4**: p. 167-182.  
32  
33  
34  
35 49. Knafl, K., & Deatrick, J. How families manage chronic conditions: An analysis of  
36  
37 the concept of normalisation *Research in Nursing and Health*, 1986. **9**: p. 215.  
38  
39  
40  
41 50. Taylor, M., Gibson, F., Franck, L. The experience of living with a chronic illness  
42  
43 during adolescence: a critical review of the literature *Journal of clinical nursing*,  
44  
45 2008. **17**(23): p. 3083.  
46  
47  
48  
49 51. Sanderson, T., Calnan, M., Morris, M., Richards, P, Hewlett, S. Shifting  
50  
51 normalities: interactions of changing conceptions of a normal life and the  
52  
53 normalisation of symptoms in rheumatoid arthritis. *Sociology of Health and*  
54  
55 *Illness*, 2011. **4**: p. 618-33.  
56  
57  
58  
59  
60

- 1  
2  
3 52. Frank, A. *The Wounded Story Teller: Body, Illness and Ethics*. 1997, Chicago, IL:  
4 Chicago University Press.  
5  
6  
7  
8  
9 53. Deci, E.L., & Ryan, R.M. *Intrinsic motivation and self-determination in human*  
10 *behavior. Perspectives in social psychology*. 1985, New York: Plenum. xv, 371 p.  
11  
12  
13  
14 54. Deci, E., & Ryan, R. *Self-determination theory: A macrotheory of human*  
15 *motivation, development and health. Canadian Psychology/Psychologie*  
16 *canadienne*, 2008. **49**(3): p. 182-185.  
17  
18  
19  
20  
21  
22 55. Russell, K.L., & Bray, S.R. *Promoting self-determined motivation for exercise in*  
23 *cardiac rehabilitation: the role of autonomy support. Rehabil Psychol*, 2010.  
24  
25  
26 **55**(1): p. 74-80.  
27  
28  
29  
30 56. Silva, M.N., Vieira, P.N., Coutinho, S.R., Minderico, C.S., Matos, M.G., Sardinha,  
31 L.B., Teixeira, P.J. *Using self-determination theory to promote physical activity*  
32 *and weight control: a randomized controlled trial in women. J Behav Med*, 2010.  
33  
34  
35  
36 **33**(2): p. 110-22.  
37  
38  
39  
40 57. Sweet, S.N., Fortia, M.S., Strachan, S.M., Blanchard, C.M., Boulay, P. *Testing a*  
41 *Longitudinal Integrated Self-Efficacy and Self-Determination Theory Model for*  
42 *Physical Activity Post-Cardiac Rehabilitation. Health Psychol Res*, 2014. **2**(1): p.  
43  
44  
45  
46  
47  
48  
49  
50 58. Brown, H., Atkin, A.J., Panter, J., Wong, G., Chinapaw, M.J., van Sluijs, E.M. *Family*  
51 *based interventions to increase physical activity in children: A systematic review,*  
52 *meta-analysis and realist synthesis. Obesity Reviews*, 2016. **17**.  
53  
54  
55  
56  
57  
58  
59  
60

1  
2  
3  
4  
5  
6  
7  
8  
9  
10  
11  
12  
13  
14  
15  
16  
17  
18  
19  
20  
21  
22  
23  
24  
25  
26  
27  
28  
29  
30  
31  
32  
33  
34  
35  
36  
37  
38  
39  
40  
41  
42  
43  
44  
45  
46  
47  
48  
49  
50  
51  
52  
53  
54  
55  
56  
57  
58  
59  
60

Figure legends:

Figure 1. PRISMA flow diagram

For peer review only

Table 1: Characteristics of included studies

| Reference    | Location  | Participants                                                                                                          | Data collection                                                                                    | Data analysis                          | Summary of findings                                                                                                                                                                                                                                                                                                                                                                                         |
|--------------|-----------|-----------------------------------------------------------------------------------------------------------------------|----------------------------------------------------------------------------------------------------|----------------------------------------|-------------------------------------------------------------------------------------------------------------------------------------------------------------------------------------------------------------------------------------------------------------------------------------------------------------------------------------------------------------------------------------------------------------|
| Fereday 2009 | Australia | 25 participants (aged 4 to 16 years).<br>Fourteen had a diagnosis of type 1 diabetes, 6 asthma and 5 cystic fibrosis. | A combination of focus groups, interviews, drawing maps, taking photos, and traffic light posters. | Interpretive phenomenological analysis | Children and young people described their active participation in a wide variety of physical activities including organised sports and play but made very little mention of any negative influence or impact due to their disease. Their parents' stories described the diligent background planning and management undertaken to enable their child to participate in a wide range of physical activities. |

1  
2  
3  
4  
5  
6  
7  
8  
9  
10  
11  
12  
13  
14  
15  
16  
17  
18  
19  
20  
21  
22  
23  
24  
25  
26  
27  
28  
29  
30  
31  
32  
33  
34  
35  
36  
37  
38  
39  
40  
41  
42  
43  
44  
45  
46

---

|              |     |                                                                                                                                                                                                                                                                              |                                                                                                                   |                   |                                                                                                                                                                                                                                                                                                                                                                                                                                                                                                                                                                                                                                |
|--------------|-----|------------------------------------------------------------------------------------------------------------------------------------------------------------------------------------------------------------------------------------------------------------------------------|-------------------------------------------------------------------------------------------------------------------|-------------------|--------------------------------------------------------------------------------------------------------------------------------------------------------------------------------------------------------------------------------------------------------------------------------------------------------------------------------------------------------------------------------------------------------------------------------------------------------------------------------------------------------------------------------------------------------------------------------------------------------------------------------|
| Happ<br>2013 | USA | Eleven child-parent pairs. Five girls, six boys (aged 10-16 years). All had a diagnosis of CF. Six children were from the experimental group, and five from the attention-control group. Parent interview participants were nine mothers and four fathers, ages 29–51 years. | Individual child and parent interviews, conducted at two months into the exercise program and again at six months | Thematic analysis | Five major thematic categories describing child and parent perceptions and experience of the bicycle exercise program were identified in the transcripts: (a) motivators; (b) barriers; (c) effort/work; (d) exercise routine; (e) sustaining exercise. Research participation, parent-family participation, health benefits, and the child’s personality traits were primary motivators. Competing activities, priorities and responsibilities were the major barriers to implementing the exercise program as prescribed. Motivation waned and the novelty wore off for several (approximately half) parent-child dyads, who |
|--------------|-----|------------------------------------------------------------------------------------------------------------------------------------------------------------------------------------------------------------------------------------------------------------------------------|-------------------------------------------------------------------------------------------------------------------|-------------------|--------------------------------------------------------------------------------------------------------------------------------------------------------------------------------------------------------------------------------------------------------------------------------------------------------------------------------------------------------------------------------------------------------------------------------------------------------------------------------------------------------------------------------------------------------------------------------------------------------------------------------|

---

|               |        |                                                                                                           |                                                        |                     |                                                                                                                                                                                                                                                                                                                                                                                                                                                                                                  |
|---------------|--------|-----------------------------------------------------------------------------------------------------------|--------------------------------------------------------|---------------------|--------------------------------------------------------------------------------------------------------------------------------------------------------------------------------------------------------------------------------------------------------------------------------------------------------------------------------------------------------------------------------------------------------------------------------------------------------------------------------------------------|
|               |        | All participants were<br>Caucasian.                                                                       |                                                        |                     | planned to decrease or stop the exercise program<br>after the study ended.                                                                                                                                                                                                                                                                                                                                                                                                                       |
| Moola<br>2014 | Canada | Two children. One male,<br>one female.<br>Participants were<br>randomly selected from<br>an ongoing trial | Semi<br>structured<br>interviews<br>and field<br>notes | Case study analysis | The findings beg researchers to consider (a) how<br>children with life-limiting diseases borrow multiple<br>illness narrative types, (b) the role of development<br>in influencing the kinds of stories that children can<br>tell, and (c) the impact of illness narratives on<br>physical activity. By rendering the tales of two CF<br>youth in this study, we respond to Aurthur Frank's<br>call; taking a multiple narrative turn, we listen to<br>stories of a different kind of suffering. |
| Moola<br>2012 | Canada | Fourteen participants.<br>Ten males, five females                                                         | Semi<br>structured<br>interviews                       | Grounded theory     | The participants demonstrated positive or<br>negative perceptions toward physical activity and<br>different experiences—such as parental support                                                                                                                                                                                                                                                                                                                                                 |

1  
2  
3  
4  
5  
6  
7  
8  
9  
10  
11  
12  
13  
14  
15  
16  
17  
18  
19  
20  
21  
22  
23  
24  
25  
26  
27  
28  
29  
30  
31  
32  
33  
34  
35  
36  
37  
38  
39  
40  
41  
42  
43  
44  
45  
46

---

(aged 11 to 17). All had

a diagnosis of CF.

Although the majority of

the sample was

Caucasian, one

participant self-

identified as Black and

the other as East Indian.

and illness narratives—influenced youths’

perceptions. In addition, the participants

experienced physical activity within the context of

reduced time. Recommendations for developing

physical activity interventions, including the

particular need to ensure that such interventions

are not perceived as wasteful of time, are

provided.

---

Moola

Canada

Twenty-nine parents

Semi

Thematic analysis

Parents discussed the numerous benefits and

2011

who provided care to a

structured

barriers associated with physical activity for both

CF or CHD child between

interviews

child and self. Role modelling was a critical social

the ages of 10 and 18,

process to overcoming barriers. Parents

participated (16 parents

experiences were situated within the broader

from the CF clinic and 13

---



1  
2  
3  
4  
5  
6  
7  
8  
9  
10  
11  
12  
13  
14  
15  
16  
17  
18  
19  
20  
21  
22  
23  
24  
25  
26  
27  
28  
29  
30  
31  
32  
33  
34  
35  
36  
37  
38  
39  
40  
41  
42  
43  
44  
45  
46

parents from the CHD

family context characterised by a prevailing sense

centre).

of stress and complexity.

Parents were from a

range of urban and rural

locations across Ontario

and Quebec and access

to physical activity

opportunities varied

Shelley

UK

Nine participants, five

Semi

Interpretive

Findings suggest that experiences of PA in children

2018

female, four male (aged

structured

phenomenological

and young people with CF are largely comparable

8 to 16 years). All

interviews

analysis

to their non-CF peers, with individuals engaging in

participants had a

a variety of activities. CF was not perceived as a

confirmed diagnosis of

barrier per se, although participants

CF.

acknowledged that they could be limited by their

---

1  
2  
3  
4  
5  
6  
7  
8  
9  
10  
11  
12  
13  
14  
15  
16  
17  
18  
19  
20  
21  
22  
23  
24  
25  
26  
27  
28  
29  
30  
31  
32  
33  
34  
35  
36  
37  
38  
39  
40  
41  
42  
43  
44  
45  
46

symptoms. Maintenance of health emerged as a key facilitator, in some cases PA offered patients the opportunity to 'normalise' their condition.

Participants reported enjoying wearing the monitoring devices and had good compliance.

Wrist-worn devices and devices providing feedback were preferred. HCPs recognised the potential benefits of the devices in clinical practice. Recommendations based on these findings are that interventions to promote PA in children and young people with CF should be individualised and involve families to promote PA as part of an active lifestyle. Patients should

---

receive support alongside the PA data obtained from monitoring devices.

|    |         |     |                        |            |                     |
|----|---------|-----|------------------------|------------|---------------------|
| 1  |         |     |                        |            |                     |
| 2  |         |     |                        |            |                     |
| 3  |         |     |                        |            |                     |
| 4  |         |     |                        |            |                     |
| 5  |         |     |                        |            |                     |
| 6  |         |     |                        |            |                     |
| 7  |         |     |                        |            |                     |
| 8  |         |     |                        |            |                     |
| 9  |         |     |                        |            |                     |
| 10 |         |     |                        |            |                     |
| 11 |         |     |                        |            |                     |
| 12 |         |     |                        |            |                     |
| 13 | Swisher | USA | Ten participants (aged | Semi       | Verbatim and        |
| 14 |         |     | 13 to 17 years). All   | structured | transcripts were    |
| 15 | 2008    |     | participants had a     | telephone  | coded using the     |
| 16 |         |     | diagnosis of CF.       | interviews | line-by-line coding |
| 17 |         |     |                        |            | process; thus       |
| 18 |         |     |                        |            | allowing the        |
| 19 |         |     |                        |            | researcher to       |
| 20 |         |     |                        |            | deconstruct the     |
| 21 |         |     |                        |            | data into discrete  |
| 22 |         |     |                        |            | pieces of           |
| 23 |         |     |                        |            | information that    |
| 24 |         |     |                        |            |                     |
| 25 |         |     |                        |            |                     |
| 26 |         |     |                        |            |                     |
| 27 |         |     |                        |            |                     |
| 28 |         |     |                        |            |                     |
| 29 |         |     |                        |            |                     |
| 30 |         |     |                        |            |                     |
| 31 |         |     |                        |            |                     |
| 32 |         |     |                        |            |                     |
| 33 |         |     |                        |            |                     |
| 34 |         |     |                        |            |                     |
| 35 |         |     |                        |            |                     |
| 36 |         |     |                        |            |                     |
| 37 |         |     |                        |            |                     |
| 38 |         |     |                        |            |                     |
| 39 |         |     |                        |            |                     |
| 40 |         |     |                        |            |                     |
| 41 |         |     |                        |            |                     |
| 42 |         |     |                        |            |                     |
| 43 |         |     |                        |            |                     |
| 44 |         |     |                        |            |                     |
| 45 |         |     |                        |            |                     |
| 46 |         |     |                        |            |                     |

---

1  
2  
3  
4 could be compared

5  
6 and grouped into

7  
8 categories. In order

9  
10 for a code to be

11  
12 assigned to a

13  
14 response, the code

15  
16 had to be identified

17  
18 by both principal

19  
20 investigators and

21  
22 the graduate

23  
24 student.

---

Table 2. Quality assessment

| Article         | Clear Aim | Appropriate methodology | Appropriate research design | Appropriate recruitment strategy | Data collection addressed the research issues | Adequate consideration of reflexivity | Ethical issues | Sufficient rigor of data analysis | Clear statements of findings | Valuable research | Total |
|-----------------|-----------|-------------------------|-----------------------------|----------------------------------|-----------------------------------------------|---------------------------------------|----------------|-----------------------------------|------------------------------|-------------------|-------|
| Fereday         | Yes       | Yes                     | 3                           | 2                                | 3                                             | 1                                     | 3              | 3                                 | 3                            | 3                 | 21    |
| Happ            | Yes       | Yes                     | 3                           | 2                                | 3                                             | 1                                     | 3              | 3                                 | 3                            | 3                 | 21    |
| Moola<br>(2014) | Yes       | Yes                     | 3                           | 3                                | 3                                             | 2                                     | 3              | 3                                 | 3                            | 3                 | 23    |
| Moola<br>(2012) | Yes       | Yes                     | 3                           | 2                                | 3                                             | 2                                     | 3              | 3                                 | 3                            | 3                 | 22    |

|         |     |     |   |   |   |   |   |   |   |   |    |
|---------|-----|-----|---|---|---|---|---|---|---|---|----|
| Moola   | Yes | Yes | 3 | 3 | 3 | 2 | 3 | 3 | 3 | 3 | 23 |
| (2011)  |     |     |   |   |   |   |   |   |   |   |    |
| Shelley | Yes | Yes | 3 | 3 | 3 | 1 | 3 | 3 | 2 | 3 | 21 |
| Swisher | Yes | Yes | 3 | 2 | 3 | 2 | 3 | 3 | 3 | 3 | 22 |

For peer review only

1  
2  
3  
4  
5  
6  
7  
8  
9  
10  
11  
12  
13  
14  
15  
16  
17  
18  
19  
20  
21  
22  
23  
24  
25  
26  
27  
28  
29  
30  
31  
32  
33  
34  
35  
36  
37  
38  
39  
40  
41  
42  
43  
44  
45  
46  
47

For peer review only

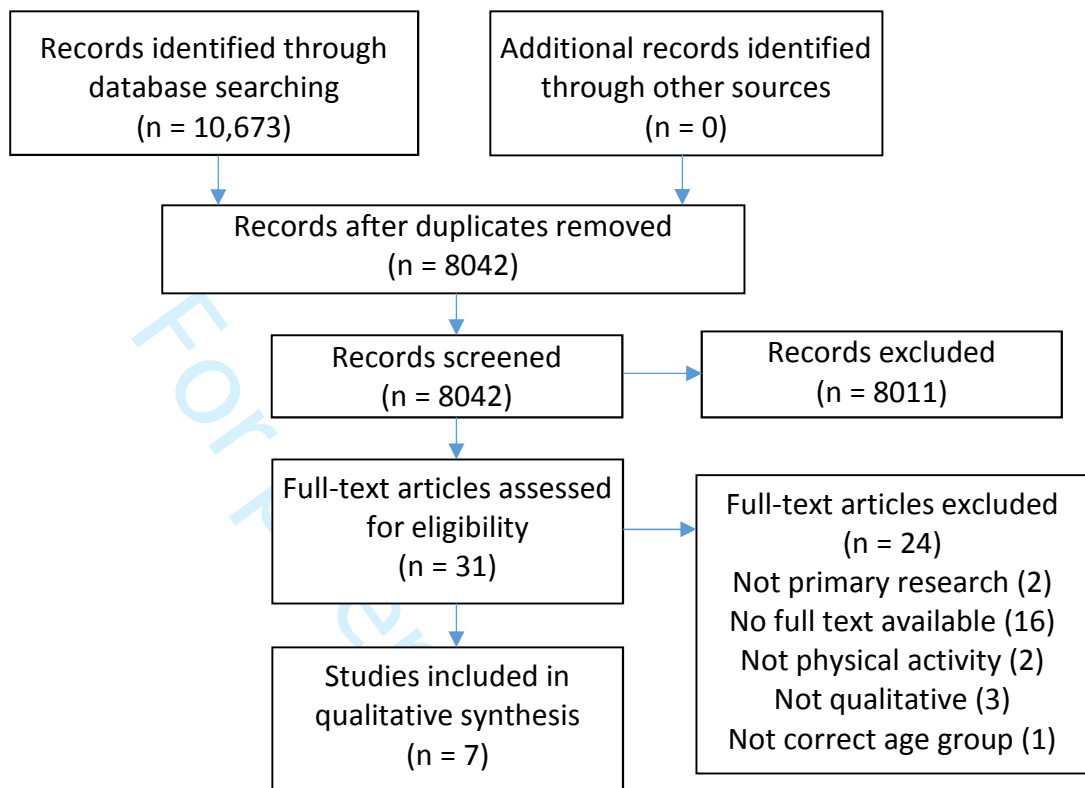

Figure 1. PRISMA flow diagram



| Section/topic       | # | Checklist item                                                                                                                                                                                                                                                                                              | Reported on page # |
|---------------------|---|-------------------------------------------------------------------------------------------------------------------------------------------------------------------------------------------------------------------------------------------------------------------------------------------------------------|--------------------|
| <b>TITLE</b>        |   |                                                                                                                                                                                                                                                                                                             |                    |
| Title               | 1 | Identify the report as a systematic review, meta-analysis, or both.                                                                                                                                                                                                                                         | 1                  |
| <b>ABSTRACT</b>     |   |                                                                                                                                                                                                                                                                                                             |                    |
| Structured summary  | 2 | Provide a structured summary including, as applicable: background; objectives; data sources; study eligibility criteria, participants, and interventions; study appraisal and synthesis methods; results; limitations; conclusions and implications of key findings; systematic review registration number. | 4                  |
| <b>INTRODUCTION</b> |   |                                                                                                                                                                                                                                                                                                             |                    |
| Rationale           | 3 | Describe the rationale for the review in the context of what is already known.                                                                                                                                                                                                                              | 7/8                |
| Objectives          | 4 | Provide an explicit statement of questions being addressed with reference to participants, interventions, comparisons, outcomes, and study design (PICOS).                                                                                                                                                  | 9                  |
| <b>METHODS</b>      |   |                                                                                                                                                                                                                                                                                                             |                    |

|                           |    |                                                                                                                                                                                                        |            |
|---------------------------|----|--------------------------------------------------------------------------------------------------------------------------------------------------------------------------------------------------------|------------|
| Protocol and registration | 5  | Indicate if a review protocol exists, if and where it can be accessed (e.g., Web address), and, if available, provide registration information including registration number.                          | NA         |
| Eligibility criteria      | 6  | Specify study characteristics (e.g., PICOS, length of follow-up) and report characteristics (e.g., years considered, language, publication status) used as criteria for eligibility, giving rationale. | 10/11      |
| Information sources       | 7  | Describe all information sources (e.g., databases with dates of coverage, contact with study authors to identify additional studies) in the search and date last searched.                             | 10/11      |
| Search                    | 8  | Present full electronic search strategy for at least one database, including any limits used, such that it could be repeated.                                                                          | Appendix 1 |
| Study selection           | 9  | State the process for selecting studies (i.e., screening, eligibility, included in systematic review, and, if applicable, included in the meta-analysis).                                              | 10/11      |
| Data collection process   | 10 | Describe method of data extraction from reports (e.g., piloted forms, independently, in duplicate) and any processes for obtaining and confirming data from investigators.                             | 12         |
| Data items                | 11 | List and define all variables for which data were sought (e.g., PICOS, funding sources) and any assumptions and simplifications made.                                                                  | 11         |

|                                    |    |                                                                                                                                                                                                                        |                    |
|------------------------------------|----|------------------------------------------------------------------------------------------------------------------------------------------------------------------------------------------------------------------------|--------------------|
| Risk of bias in individual studies | 12 | Describe methods used for assessing risk of bias of individual studies (including specification of whether this was done at the study or outcome level), and how this information is to be used in any data synthesis. | 12                 |
| Summary measures                   | 13 | State the principal summary measures (e.g., risk ratio, difference in means).                                                                                                                                          | 13                 |
| Synthesis of results               | 14 | Describe the methods of handling data and combining results of studies, if done, including measures of consistency (e.g., $I^2$ ) for each meta-analysis.                                                              | 13                 |
| Section/topic                      | #  | Checklist item                                                                                                                                                                                                         | Reported on page # |
| Risk of bias across studies        | 15 | Specify any assessment of risk of bias that may affect the cumulative evidence (e.g., publication bias, selective reporting within studies).                                                                           |                    |
| Additional analyses                | 16 | Describe methods of additional analyses (e.g., sensitivity or subgroup analyses, meta-regression), if done, indicating which were pre-specified.                                                                       |                    |
| <b>RESULTS</b>                     |    |                                                                                                                                                                                                                        |                    |
| Study selection                    | 17 | Give numbers of studies screened, assessed for eligibility, and included in the review, with                                                                                                                           | Flow               |

|                               |    |                                                                                                                                                                                                          |              |
|-------------------------------|----|----------------------------------------------------------------------------------------------------------------------------------------------------------------------------------------------------------|--------------|
|                               |    | reasons for exclusions at each stage, ideally with a flow diagram.                                                                                                                                       | diagram<br>1 |
| Study characteristics         | 18 | For each study, present characteristics for which data were extracted (e.g., study size, PICOS, follow-up period) and provide the citations.                                                             | Table 1      |
| Risk of bias within studies   | 19 | Present data on risk of bias of each study and, if available, any outcome level assessment (see item 12).                                                                                                | Table 2      |
| Results of individual studies | 20 | For all outcomes considered (benefits or harms), present, for each study: (a) simple summary data for each intervention group (b) effect estimates and confidence intervals, ideally with a forest plot. | Table 1      |
| Synthesis of results          | 21 | Present results of each meta-analysis done, including confidence intervals and measures of consistency.                                                                                                  | NA           |
| Risk of bias across studies   | 22 | Present results of any assessment of risk of bias across studies (see Item 15).                                                                                                                          | Table 2      |
| Additional analysis           | 23 | Give results of additional analyses, if done (e.g., sensitivity or subgroup analyses, meta-regression [see Item 16]).                                                                                    | NA           |

| <b>DISCUSSION</b>   |    |                                                                                                                                                                                      |       |
|---------------------|----|--------------------------------------------------------------------------------------------------------------------------------------------------------------------------------------|-------|
| Summary of evidence | 24 | Summarize the main findings including the strength of evidence for each main outcome; consider their relevance to key groups (e.g., healthcare providers, users, and policy makers). | 25    |
| Limitations         | 25 | Discuss limitations at study and outcome level (e.g., risk of bias), and at review-level (e.g., incomplete retrieval of identified research, reporting bias).                        | 29    |
| Conclusions         | 26 | Provide a general interpretation of the results in the context of other evidence, and implications for future research.                                                              | 31/32 |
| <b>FUNDING</b>      |    |                                                                                                                                                                                      |       |
| Funding             | 27 | Describe sources of funding for the systematic review and other support (e.g., supply of data); role of funders for the systematic review.                                           | 6     |

## Search strategy

1. Exp Cystic Fibrosis/
2. Cystic fibrosis.[tiab]
3. CF.[tiab]
4. Or/1-3
5. Exp Physical Activity/
6. Exp Exercise /
7. Exp Sport /
8. Active\*
9. Fitness
10. Training
11. Exercise\*
12. Movement\*
13. Physical\*
14. Sport\*
15. Yoga
16. "Active minutes"
17. "Leisure time"
18. "Resistance training"
19. "Strength training"
20. Cardiovascular
21. Or/5-20

1  
2  
3 ASSIA on ProQuest  
4

5  
6 CINAHL on EBSCOHost  
7

8  
9 EMBASE on OVIDSP,  
10

11  
12 MEDLINE on OVIDSP  
13

14  
15 MEDLINE-in-process on OVIDSP  
16

17  
18 PsycINFO on OVIDSP  
19  
20  
21  
22  
23  
24  
25  
26  
27  
28  
29  
30  
31  
32  
33  
34  
35  
36  
37  
38  
39  
40  
41  
42  
43  
44  
45  
46  
47  
48  
49  
50  
51  
52  
53  
54  
55  
56  
57  
58  
59  
60

For peer review only
