# Supplementary material for: Barriers and facilitators to physical activity among children, adolescents, and young adults with cystic fibrosis: a systematic review and thematic synthesis of qualitative research
Source: PubMed Central journal article supplement — BMJ Open. 2020 Feb 20;10(2):e035261. doi: 10.1136/bmjopen-2019-035261 (PMC7045130; doi:10.1136/bmjopen-2019-035261), 2020-02-20
Supplement: bmjopen-2019-035261supp002.pdf [file bmjopen-2019-035261supp002.pdf]

## Search strategy

1. Exp Cystic Fibrosis/
2. Cystic fibrosis.[tiab]
3. CF.[tiab]
4. Or/1-3
5. Exp Physical Activity/
6. Exp Exercise /
7. Exp Sport /
8. Active\*
9. Fitness
10. Training
11. Exercise\*
12. Movement\*
13. Physical\*
14. Sport\*
15. Yoga
16. "Active minutes"
17. "Leisure time"
18. "Resistance training"
19. "Strength training"
20. Cardiovascular
21. Or/5-20

ASSIA on ProQuest

CINAHL on EBSCOHost

EMBASE on OVIDSP,

MEDLINE on OVIDSP

MEDLINE-in-process on OVIDSP

PsycINFO on OVIDSP
